# Supplementary material
Source: Research Square preprint supplement (doi:10.21203/rs.3.rs-9655959/v1)

Unprocessed Image Figure 1A  
Spatial transcriptomics ob/ob

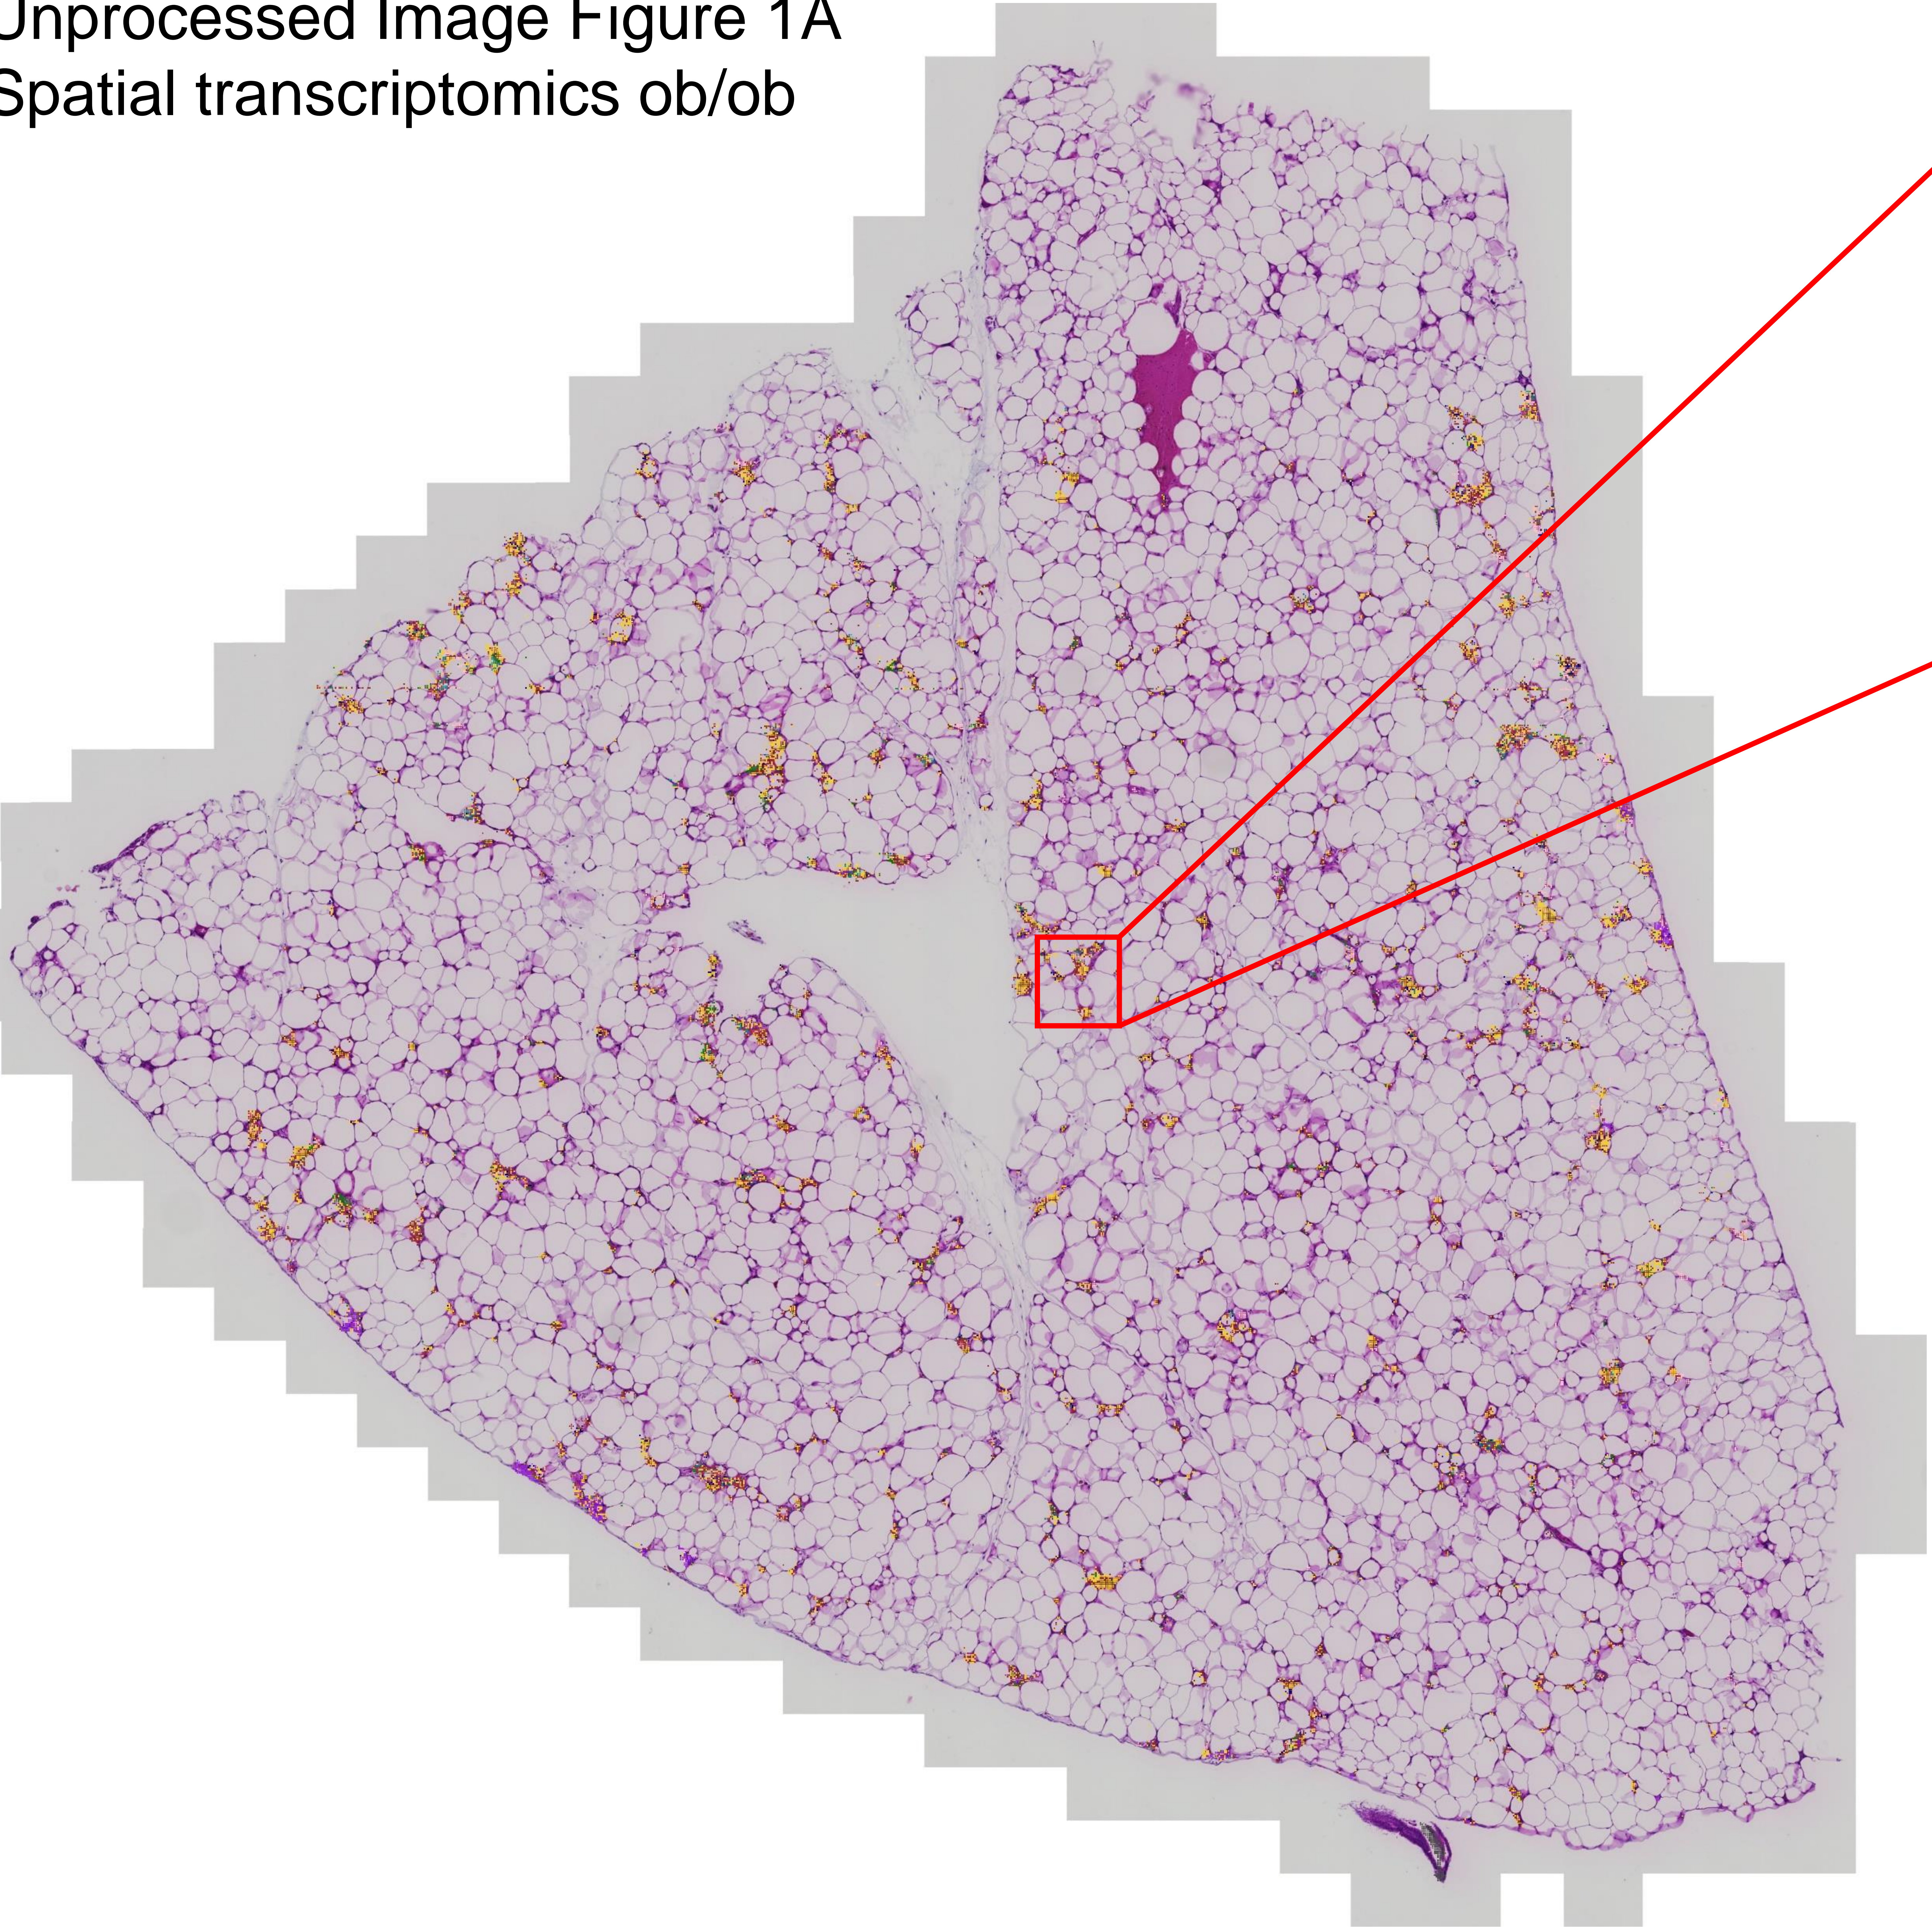

cell types

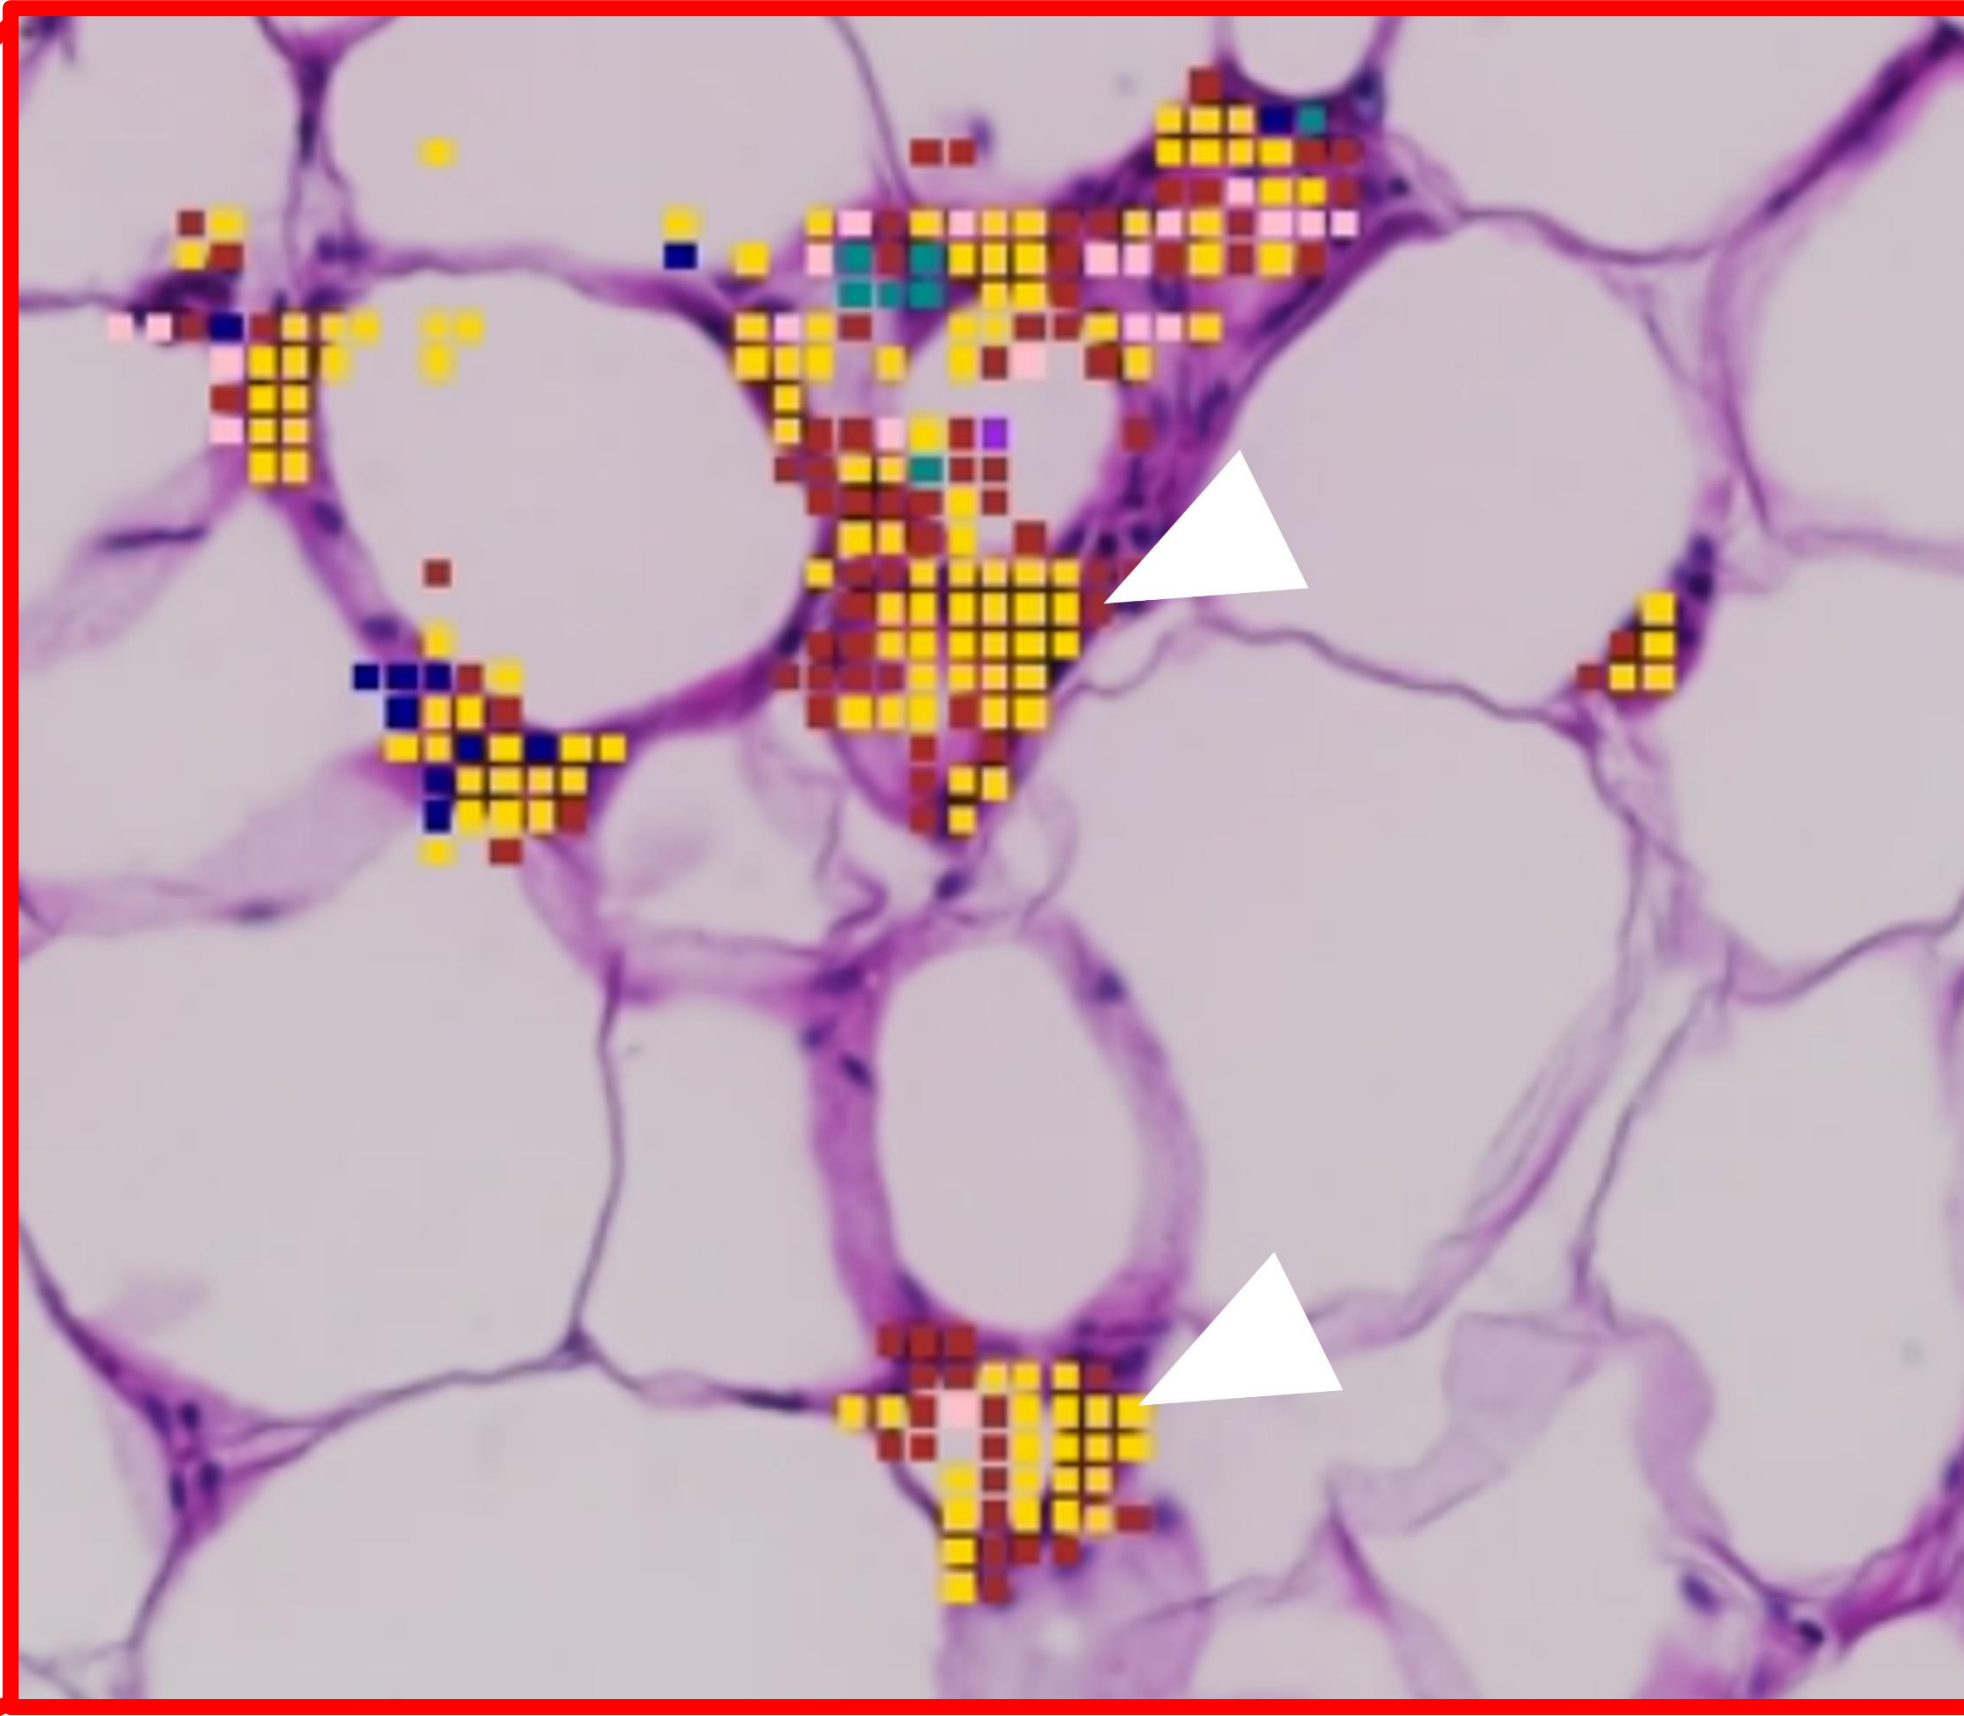

*Itgax*

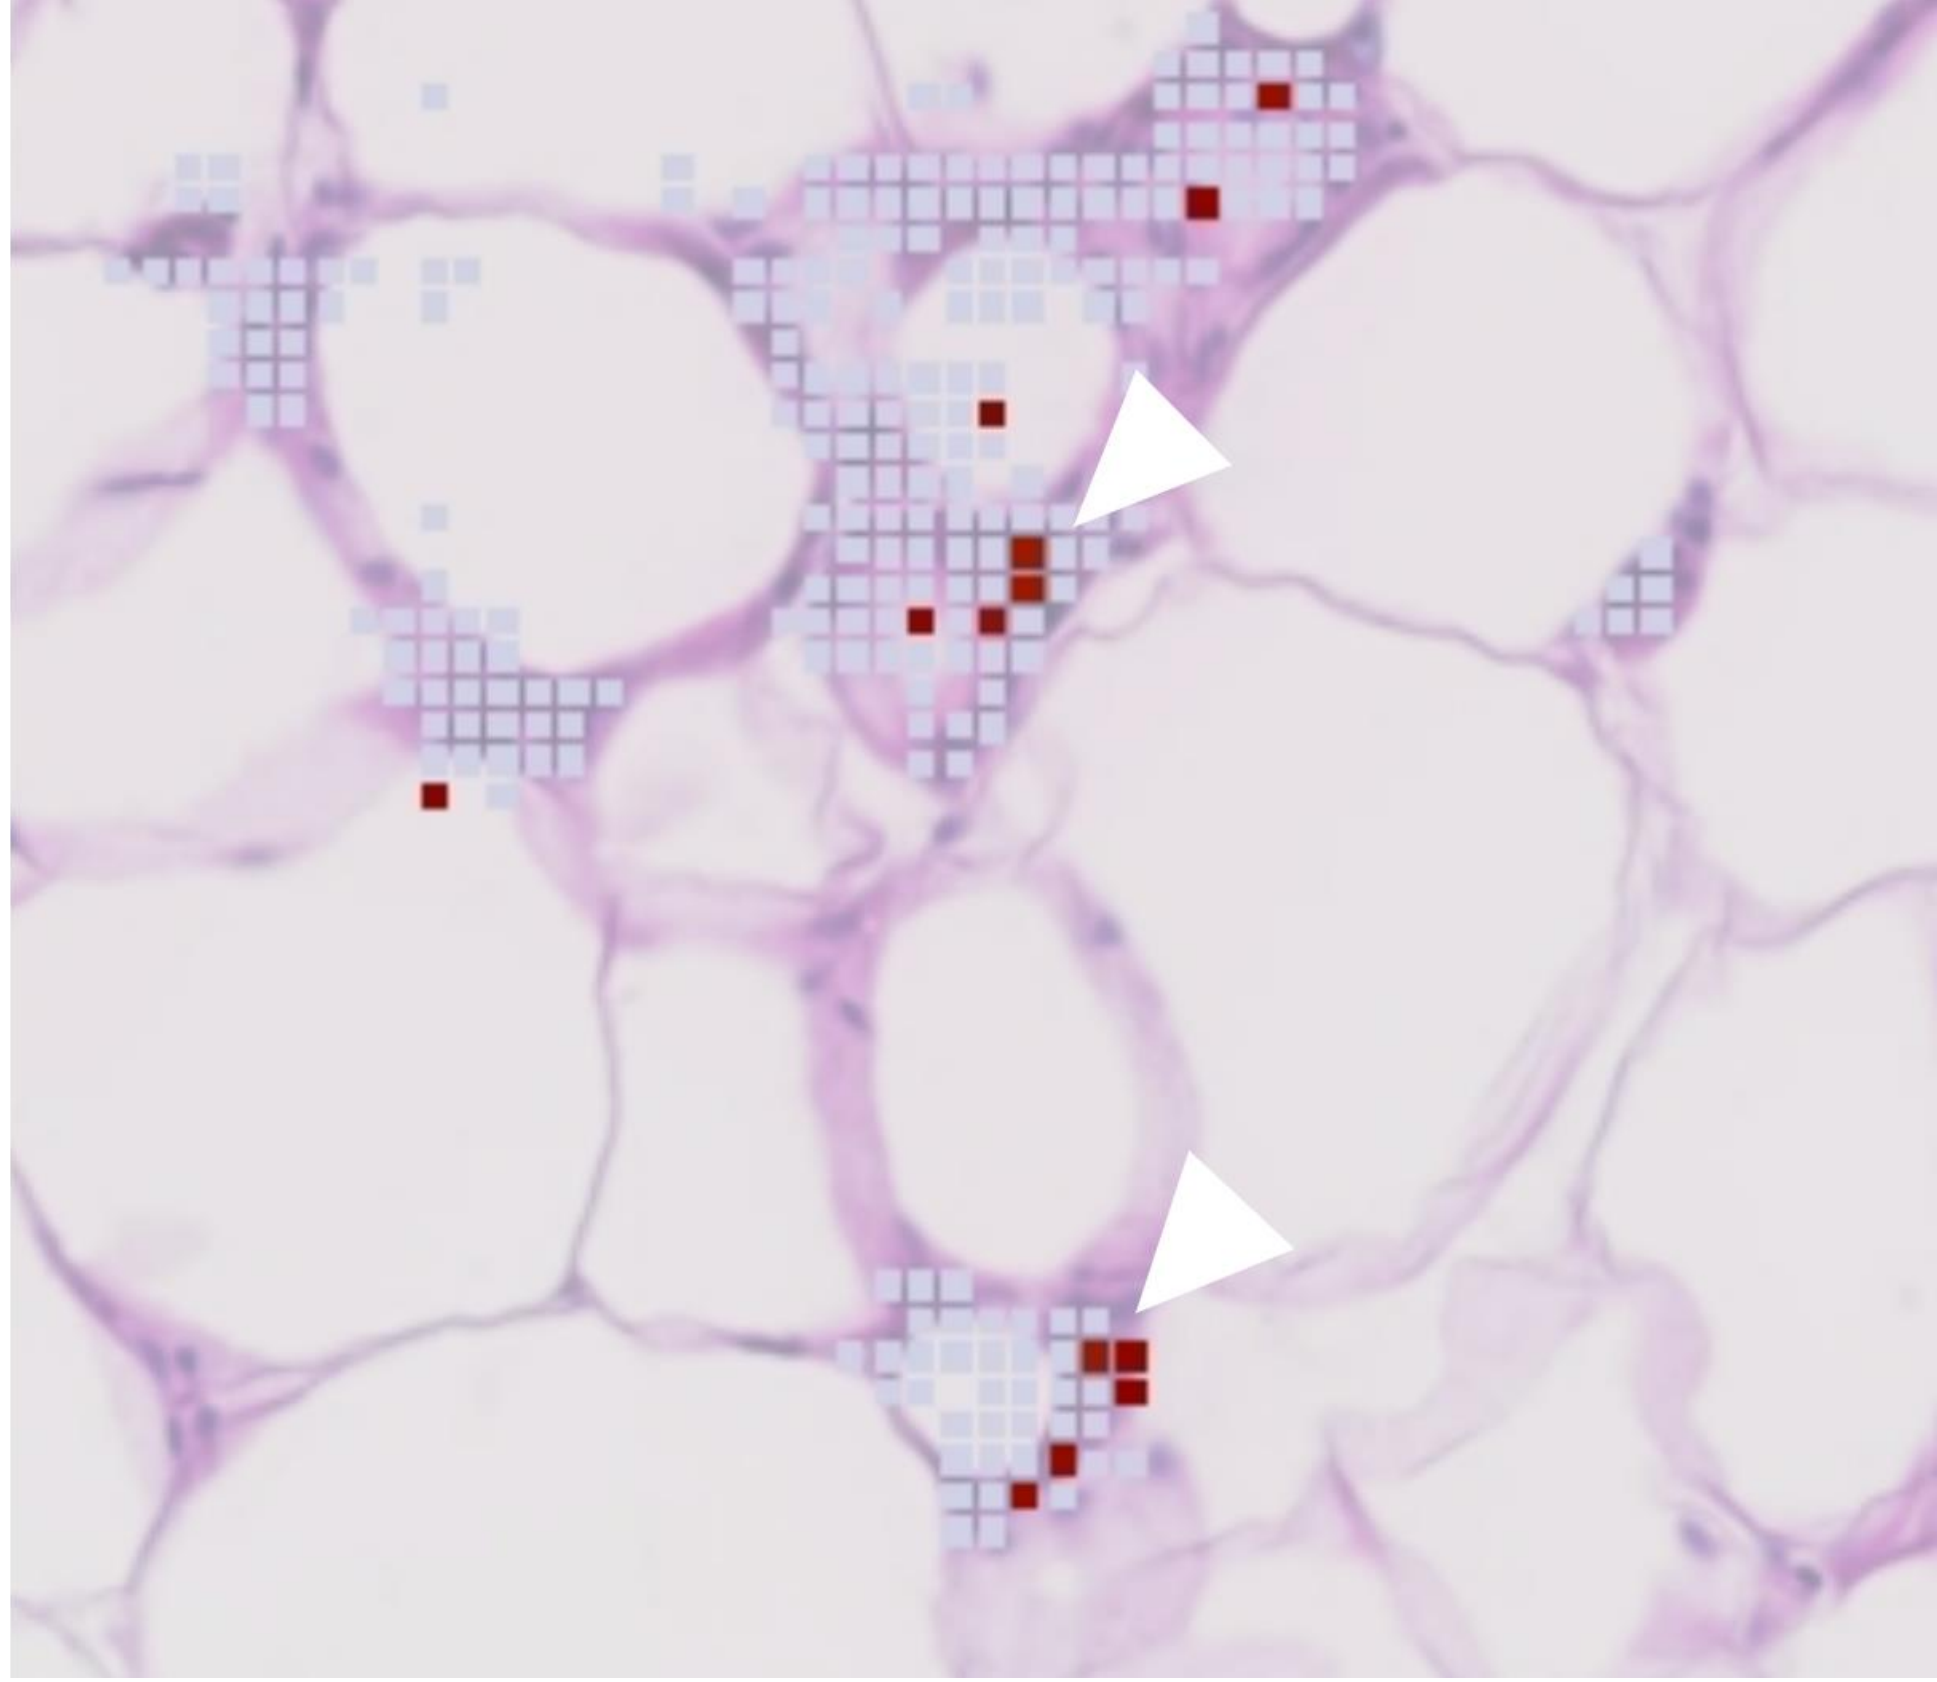

H&E

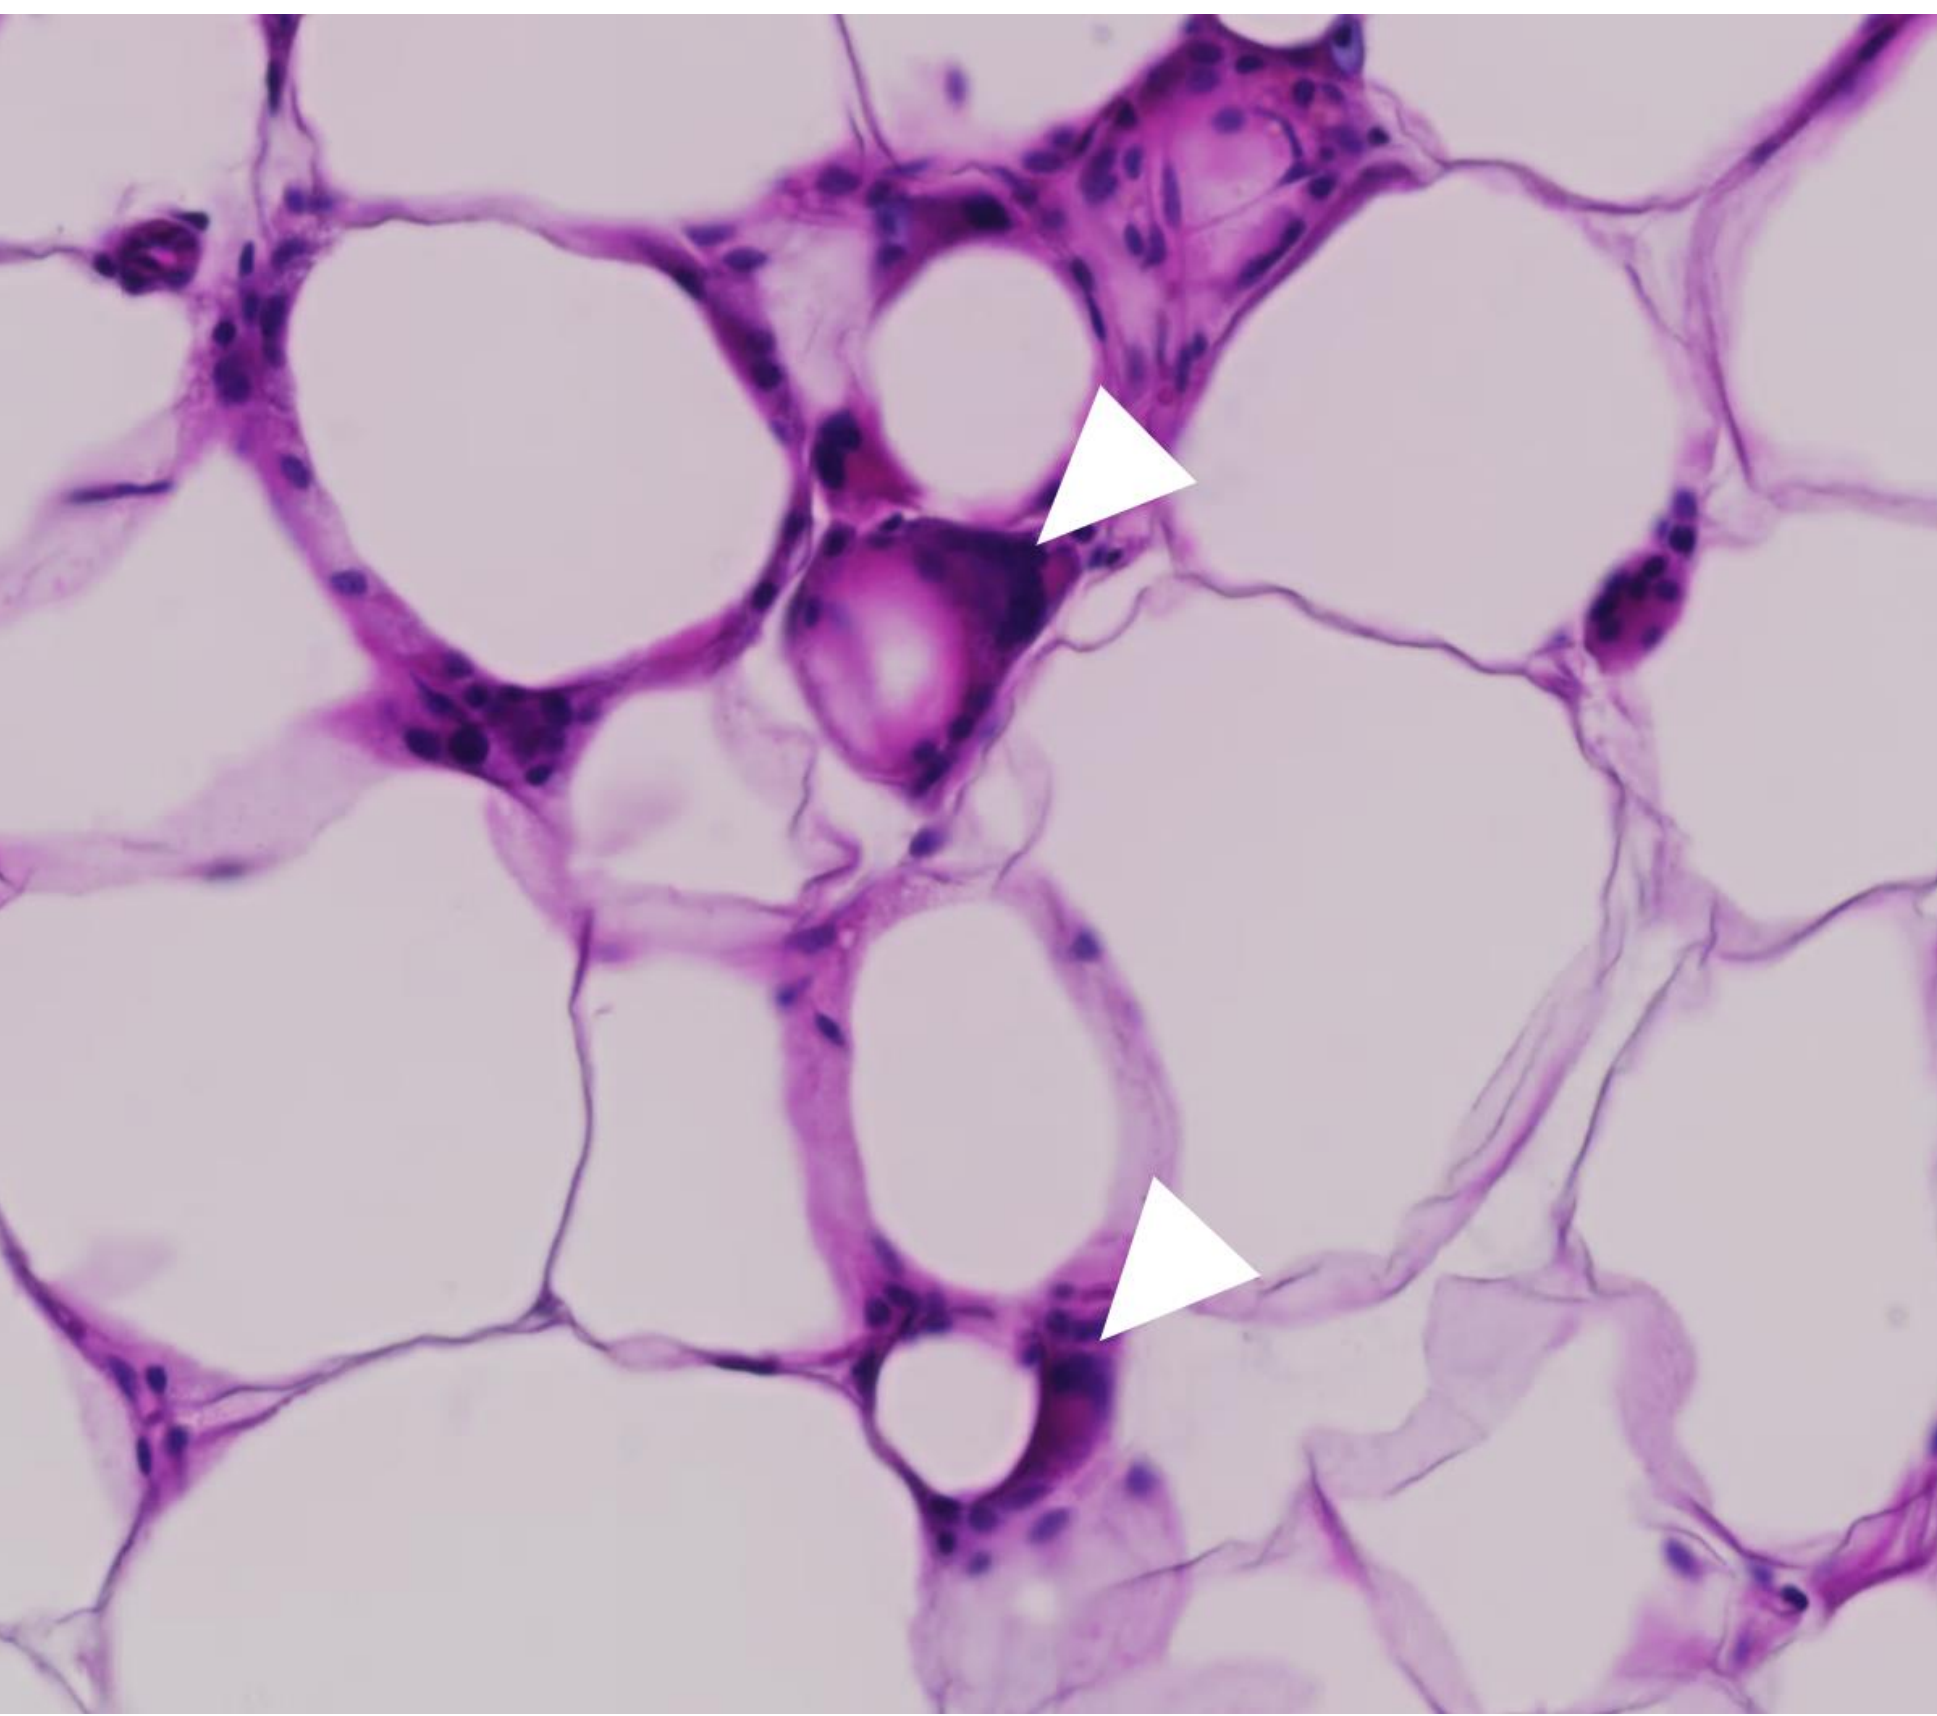

Unprocessed Images Figure 1D

ImageStream analysis CD11c expression on MGCs, male obese MacGreen

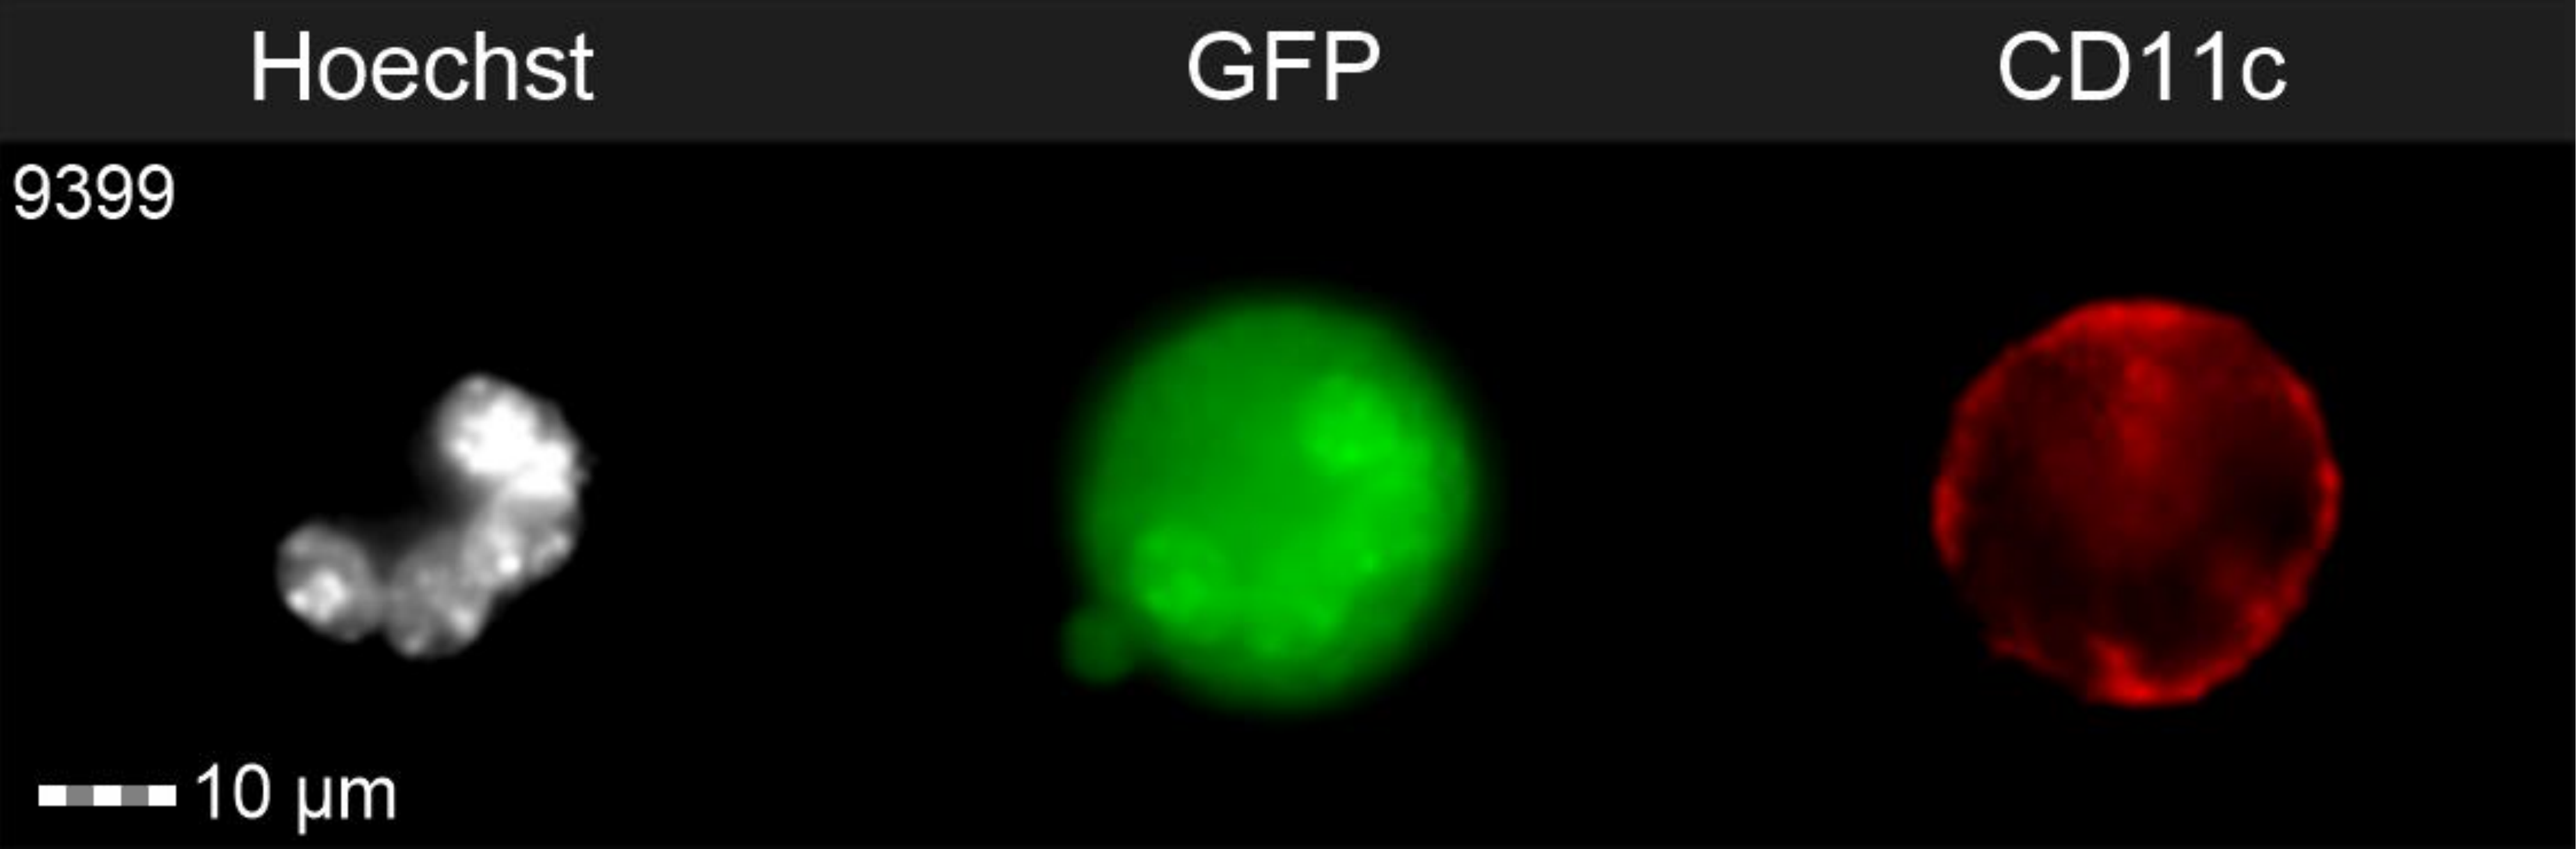

Unprocessed Images Figure 5E

ImageStream analysis nuclei within MGCs, male obese KonFATtie

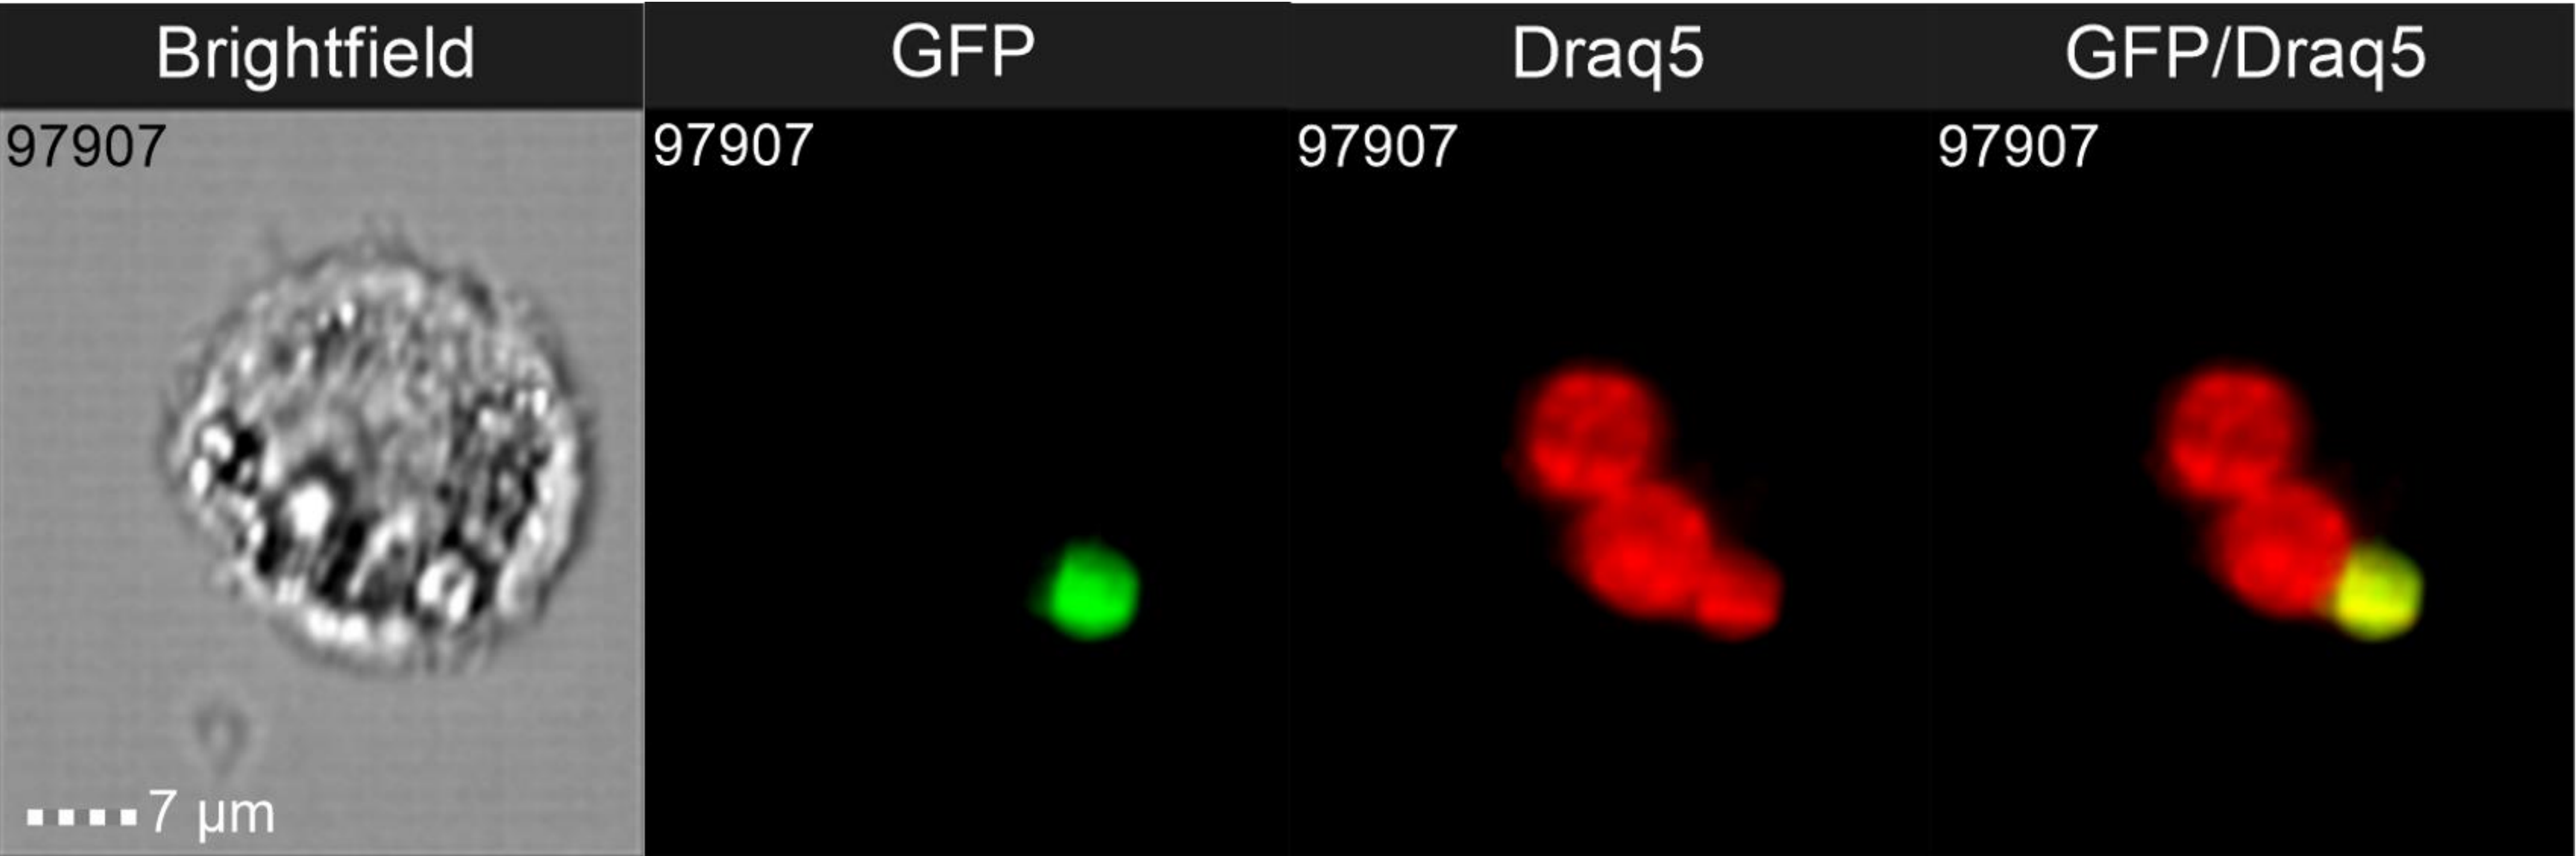

Unprocessed Images Figure 2D

EWAT, female, non-obese, 10x, **Mac-2**, **Perillipin**, **DAPI**

CD11c<sup>+/+</sup>

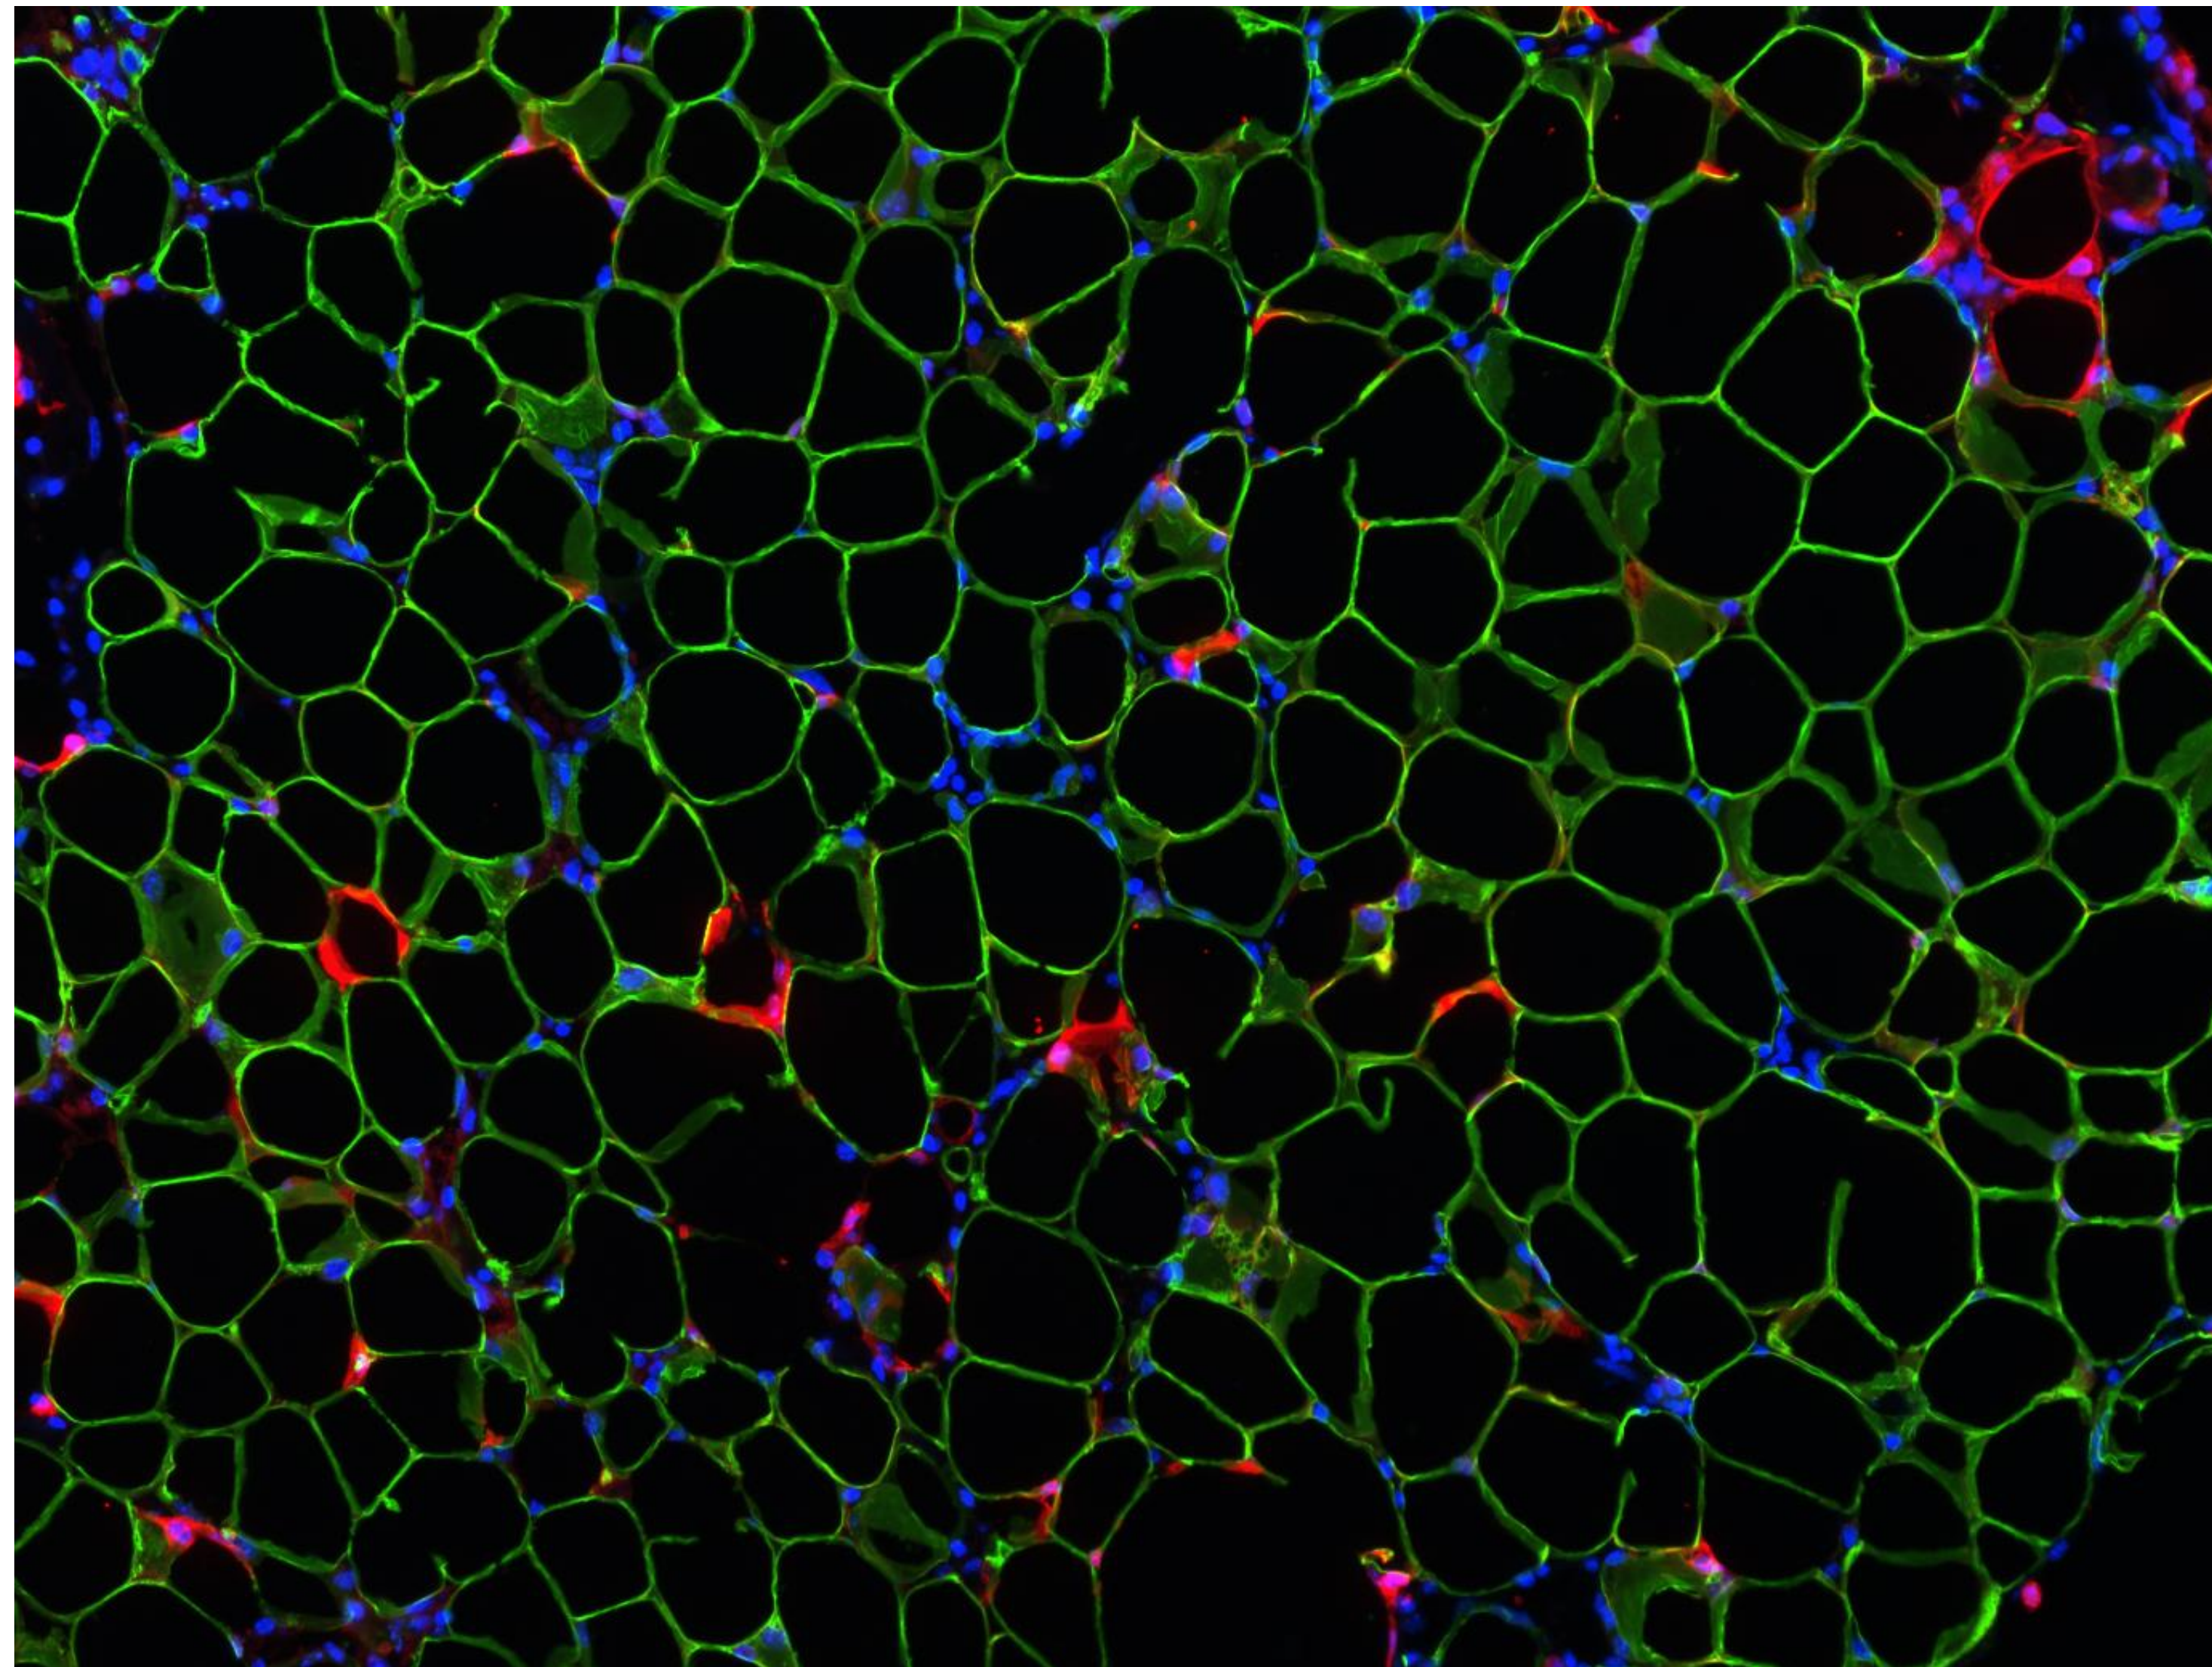

CD11c<sup>-/-</sup>

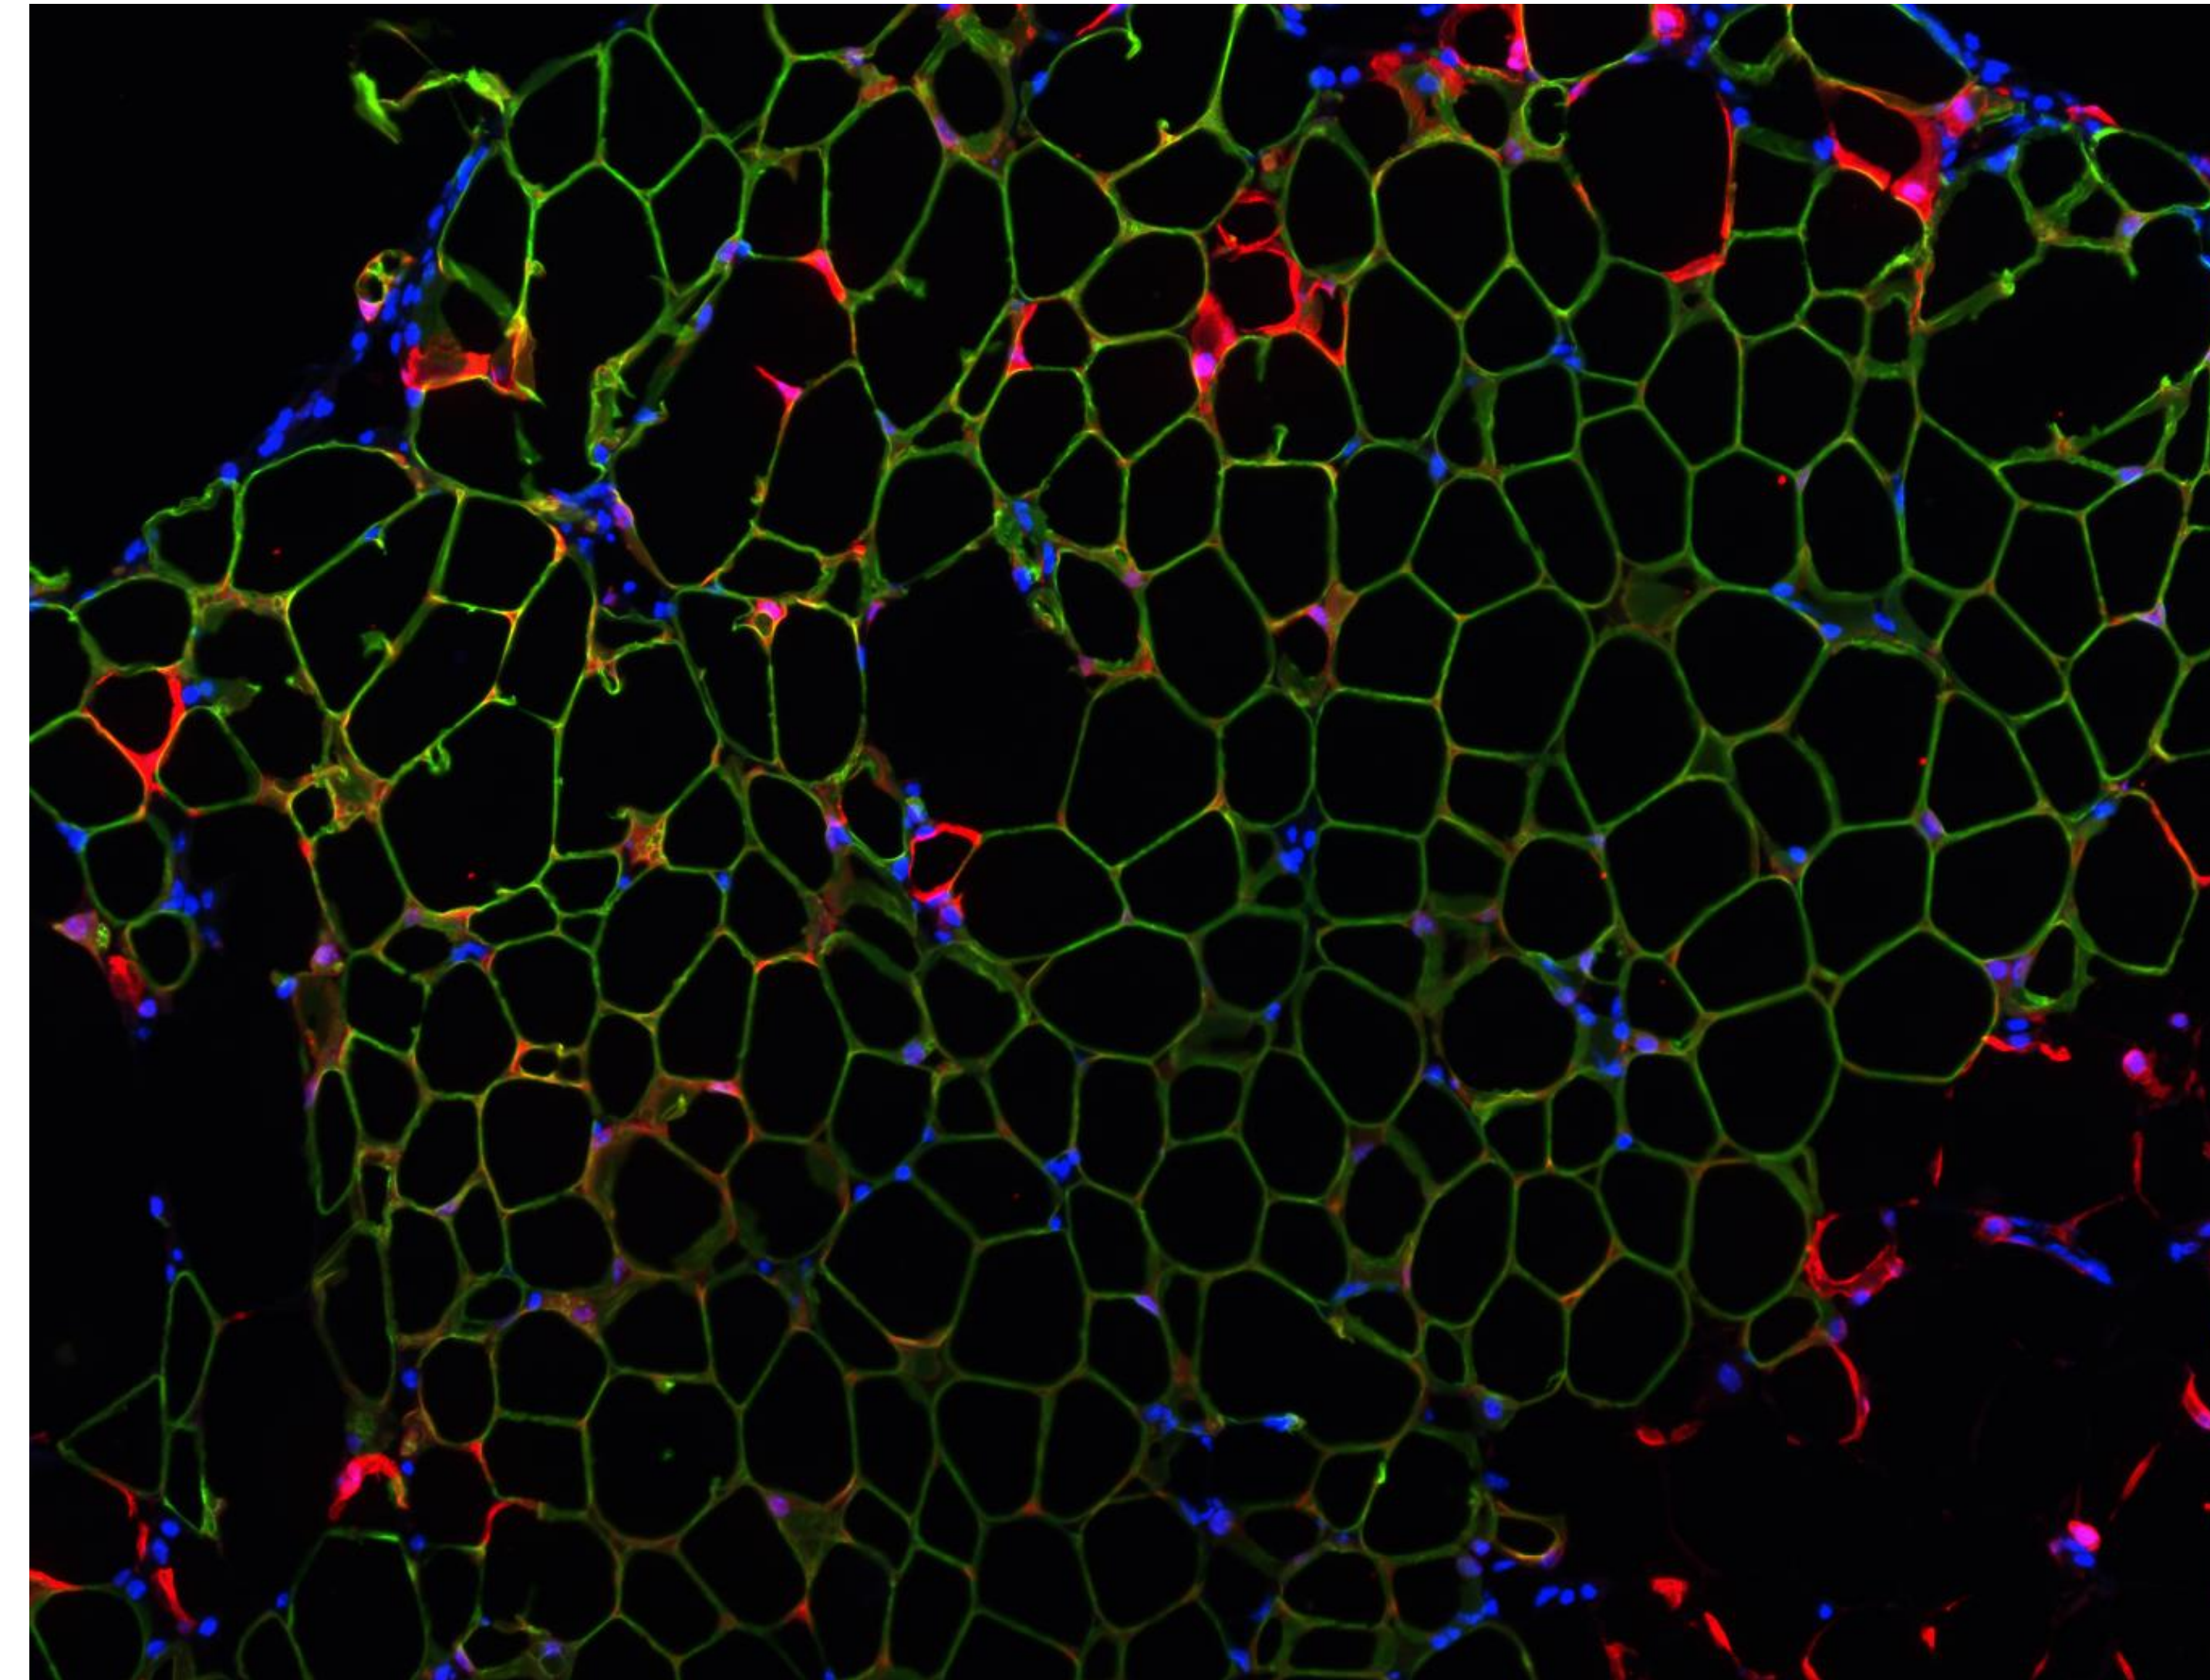

Unprocessed Image Figure 3D

EWAT, male, obese, 10x, **Mac-2**, **Perillipin**, **DAPI**

CD11c<sup>+/+</sup>

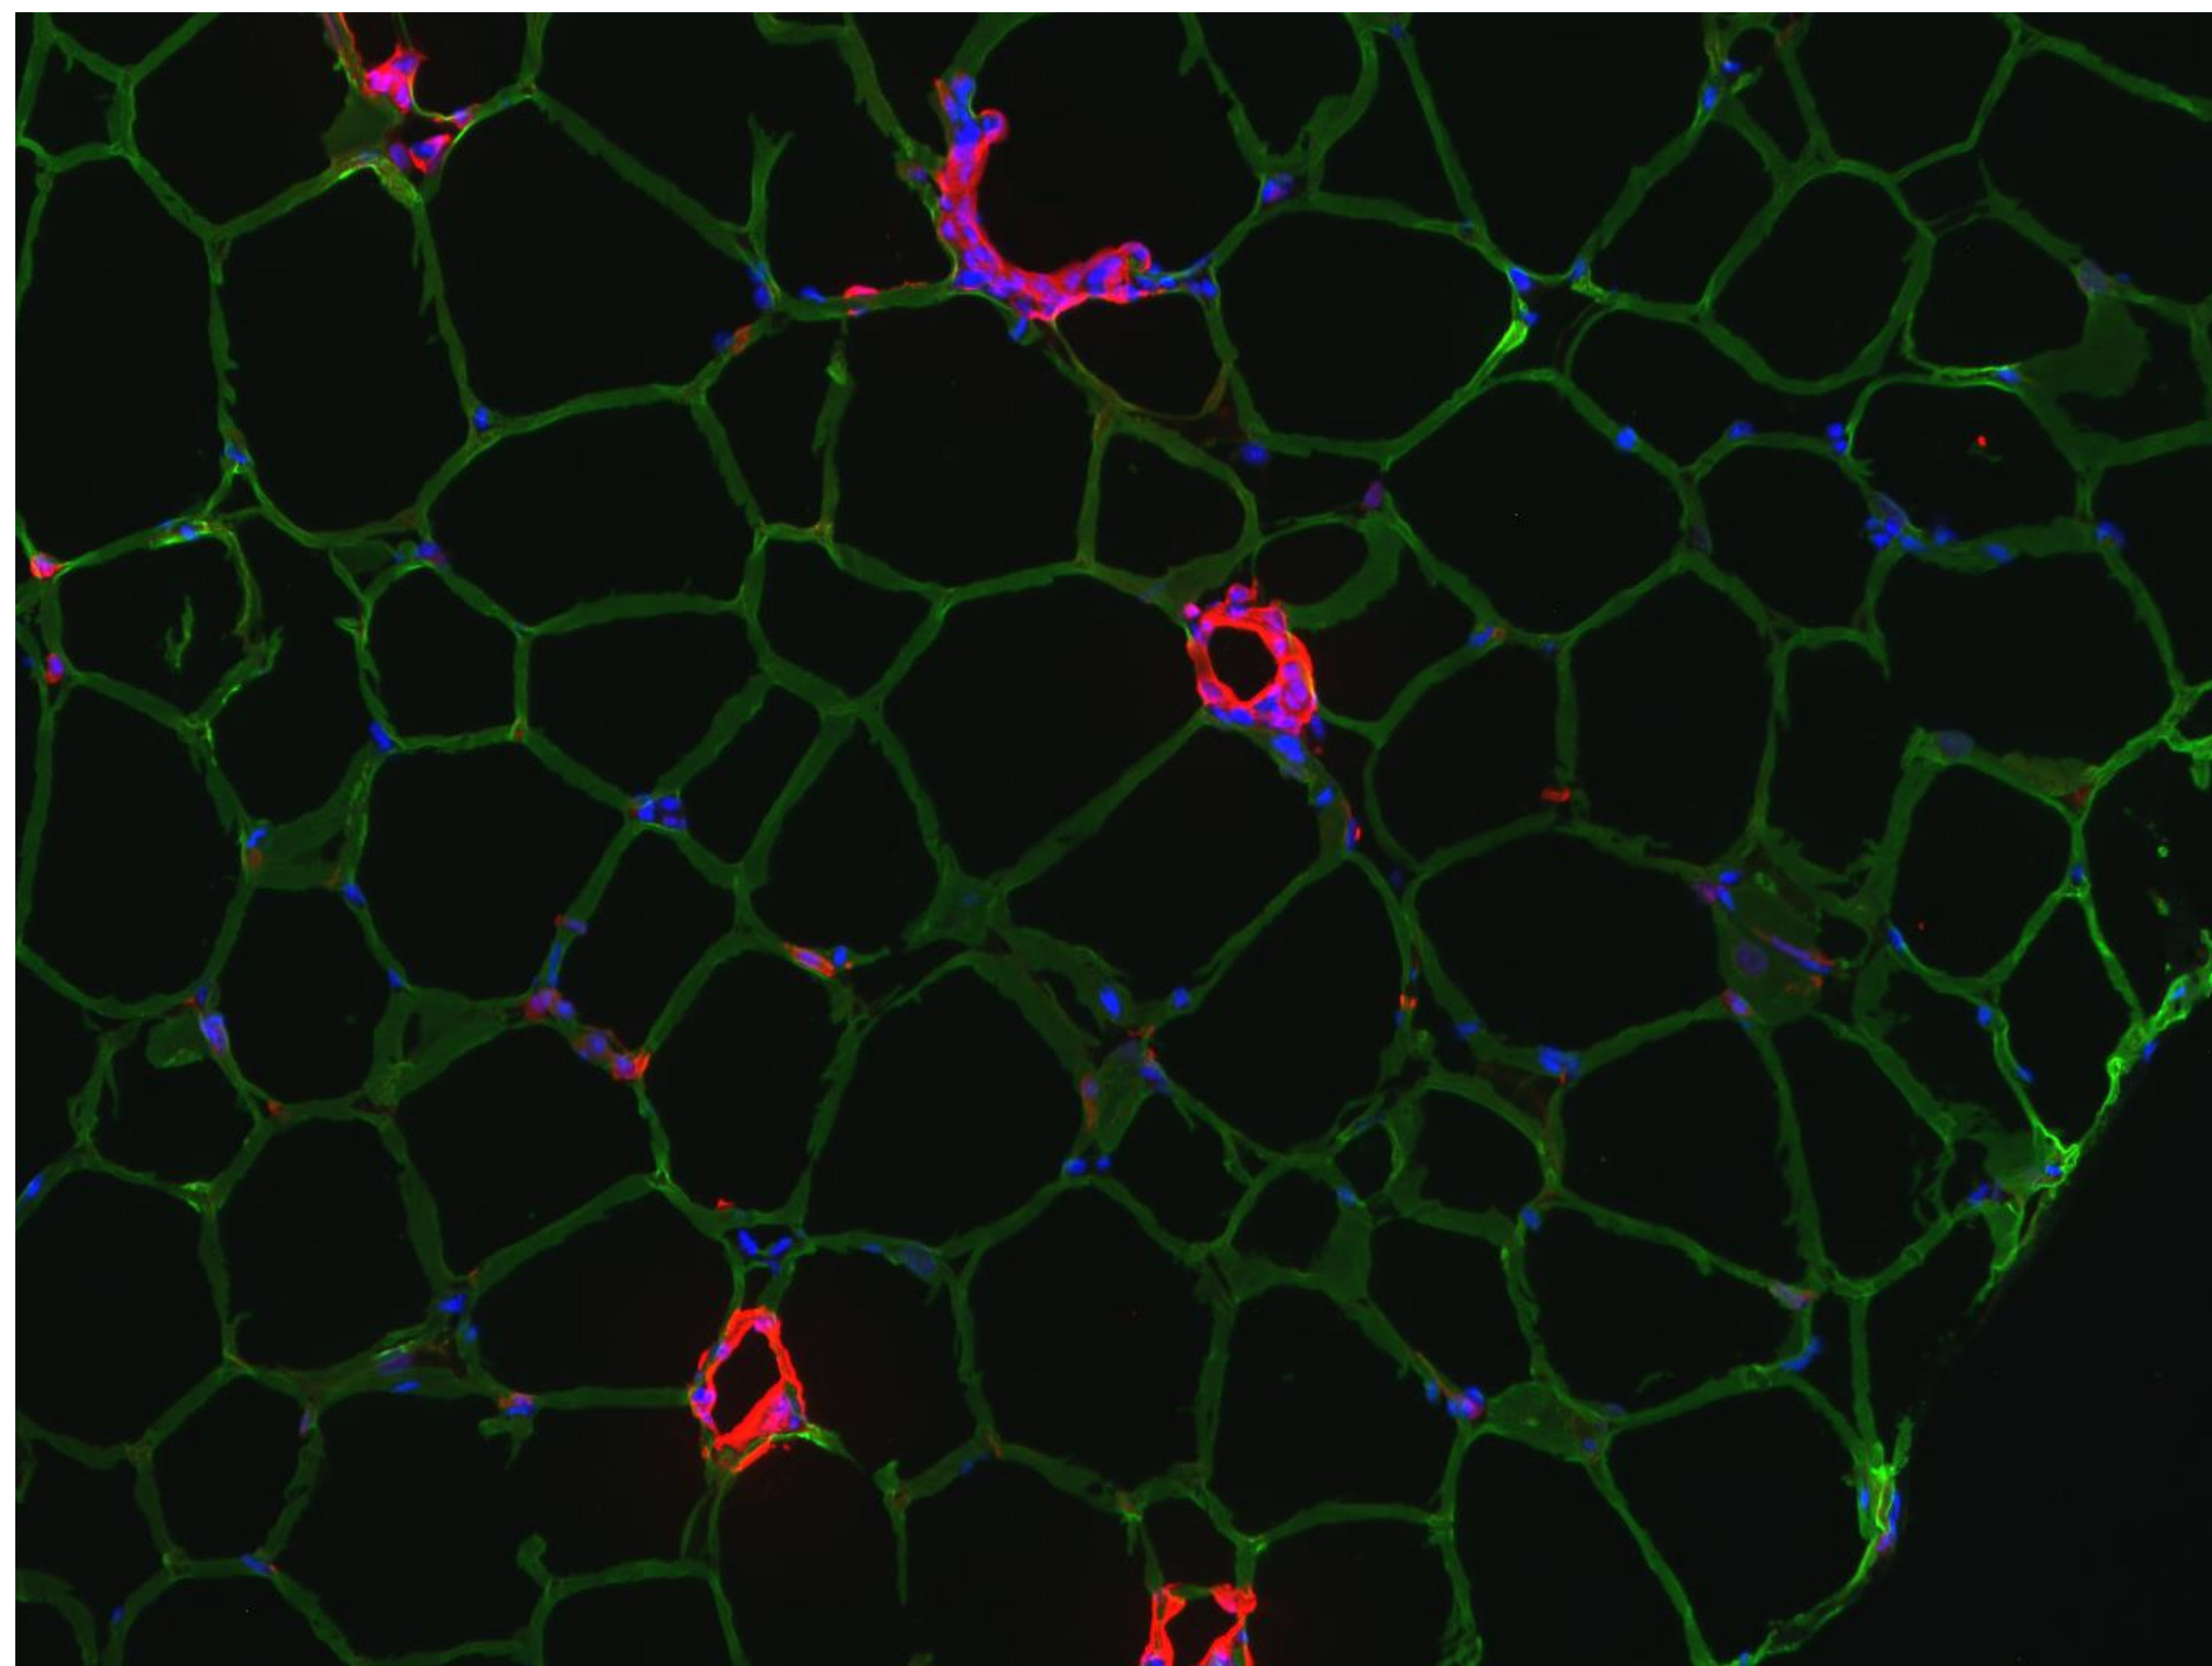

CD11c<sup>-/-</sup>

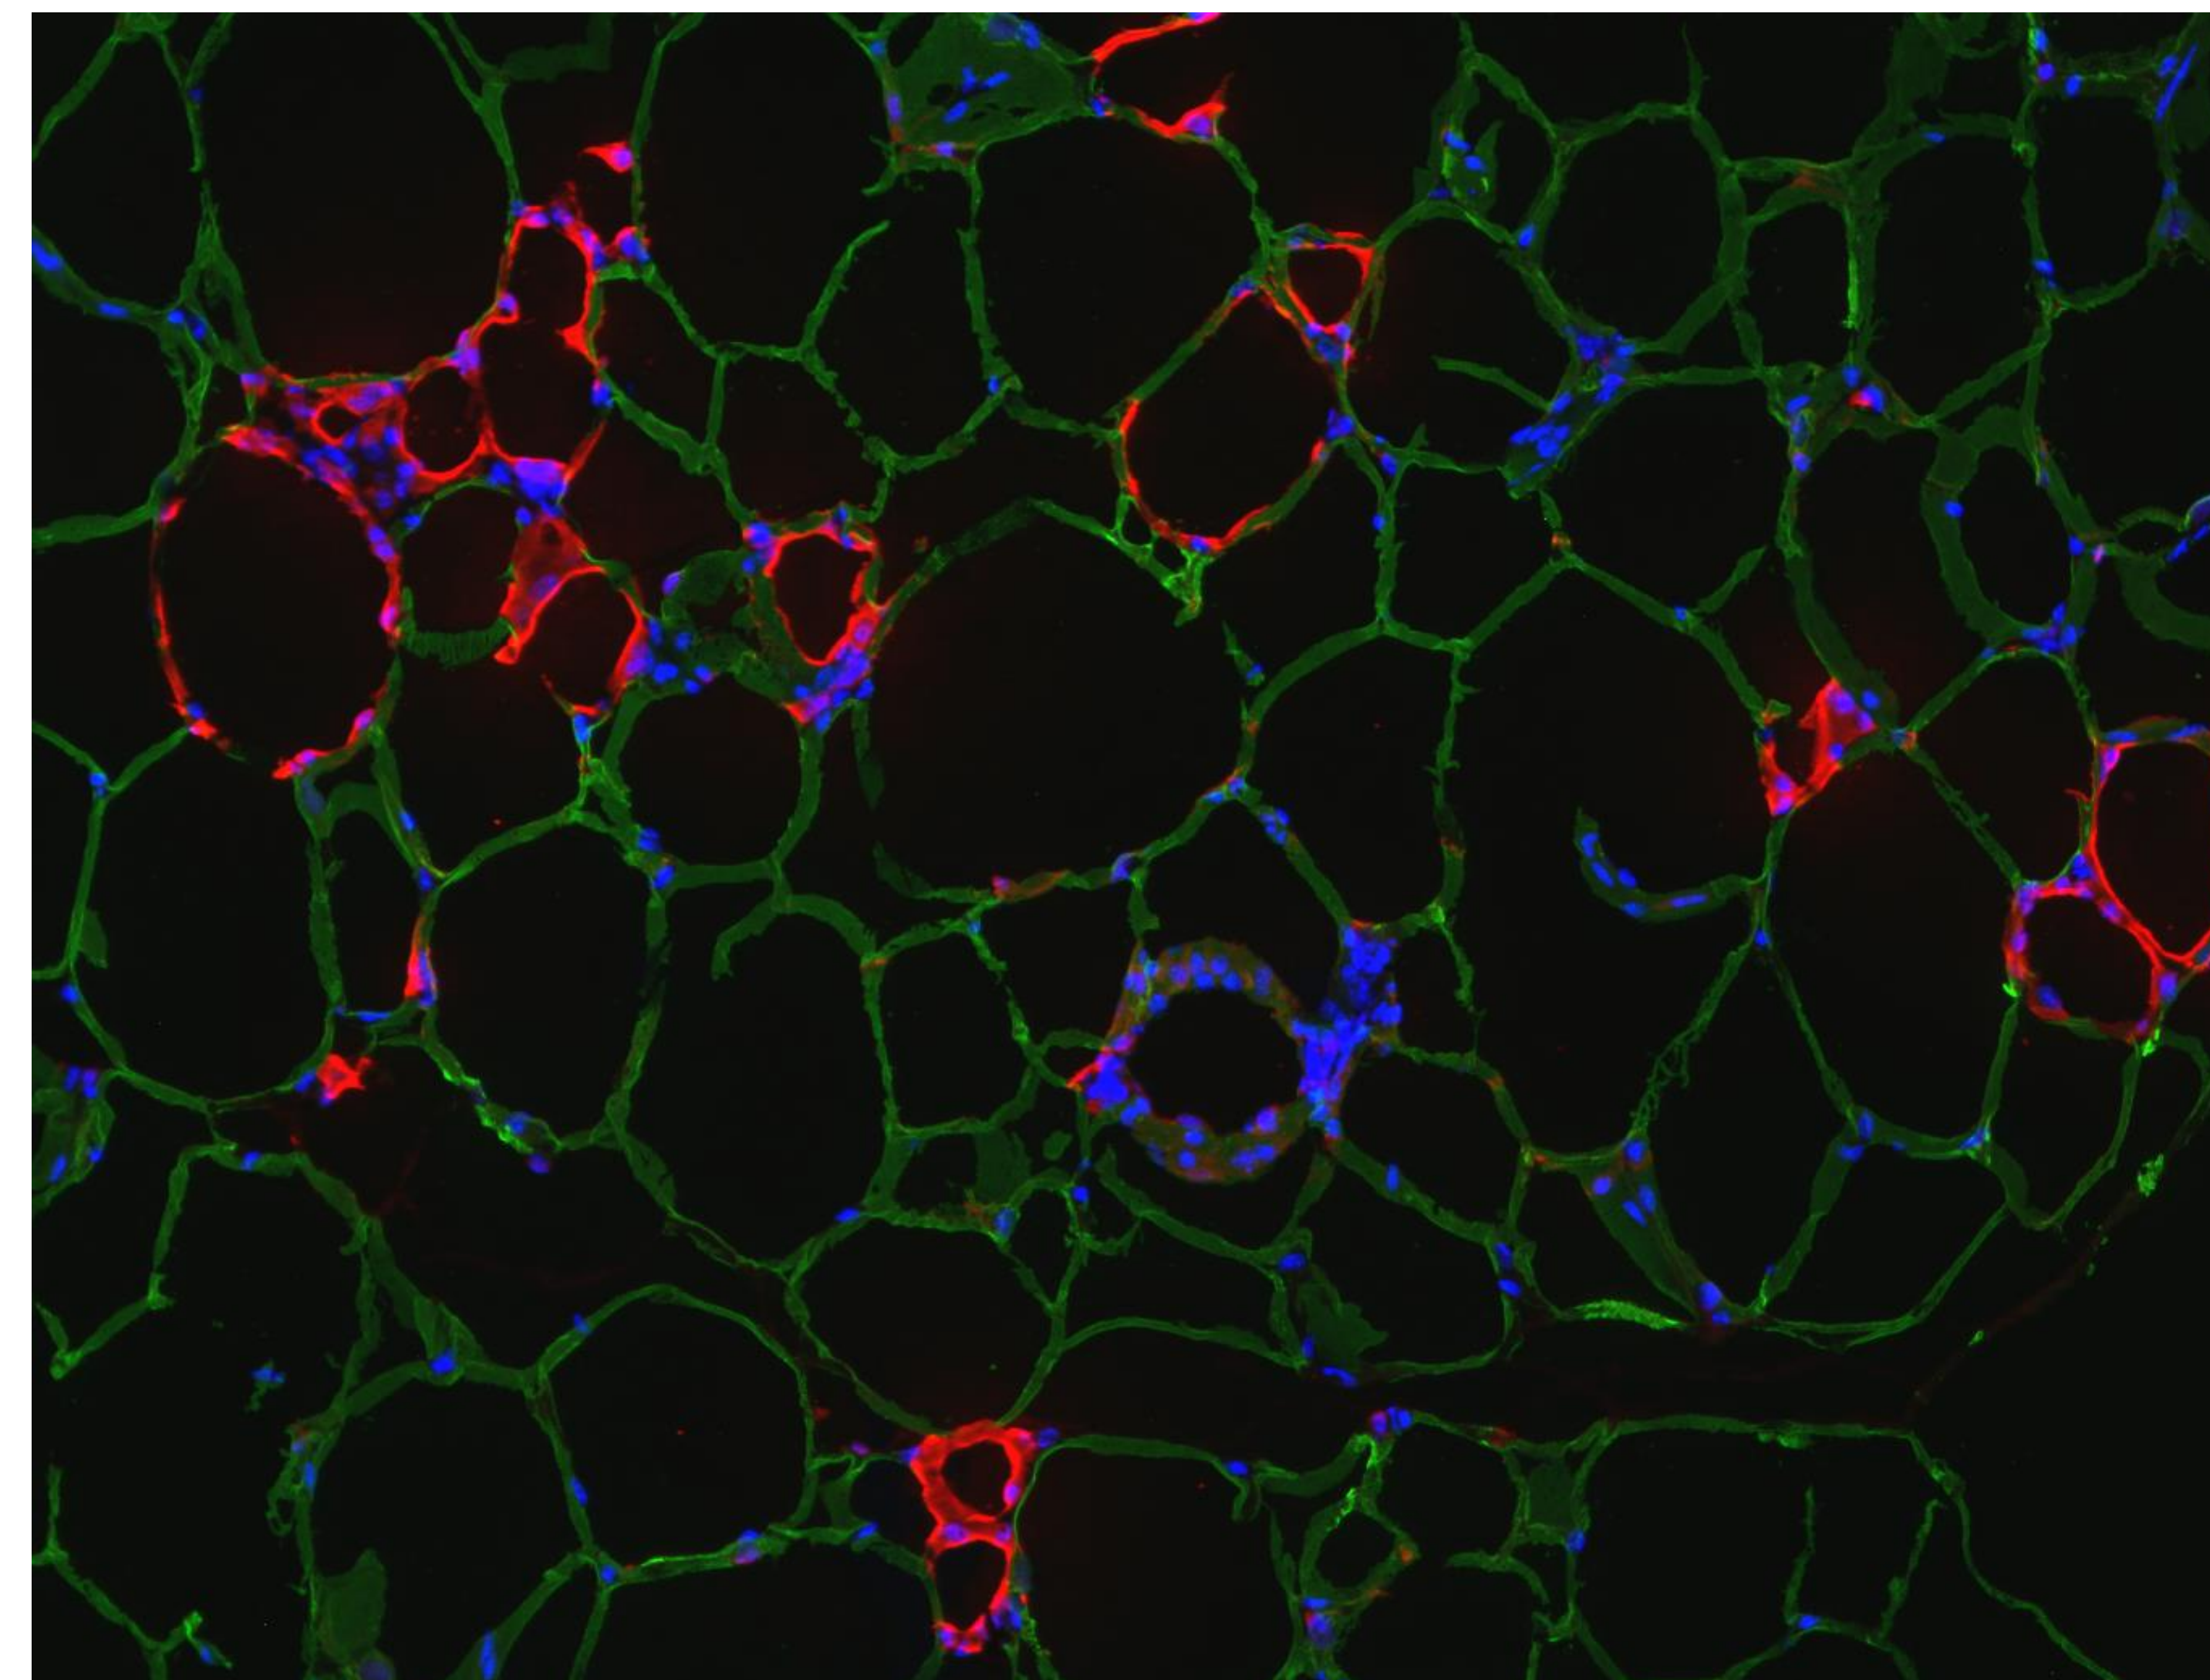

Unprocessed Images Figure 3E  
SVF of EWAT, male, obese, 10x, Mac-2, DAPI

CD11c<sup>+/+</sup>

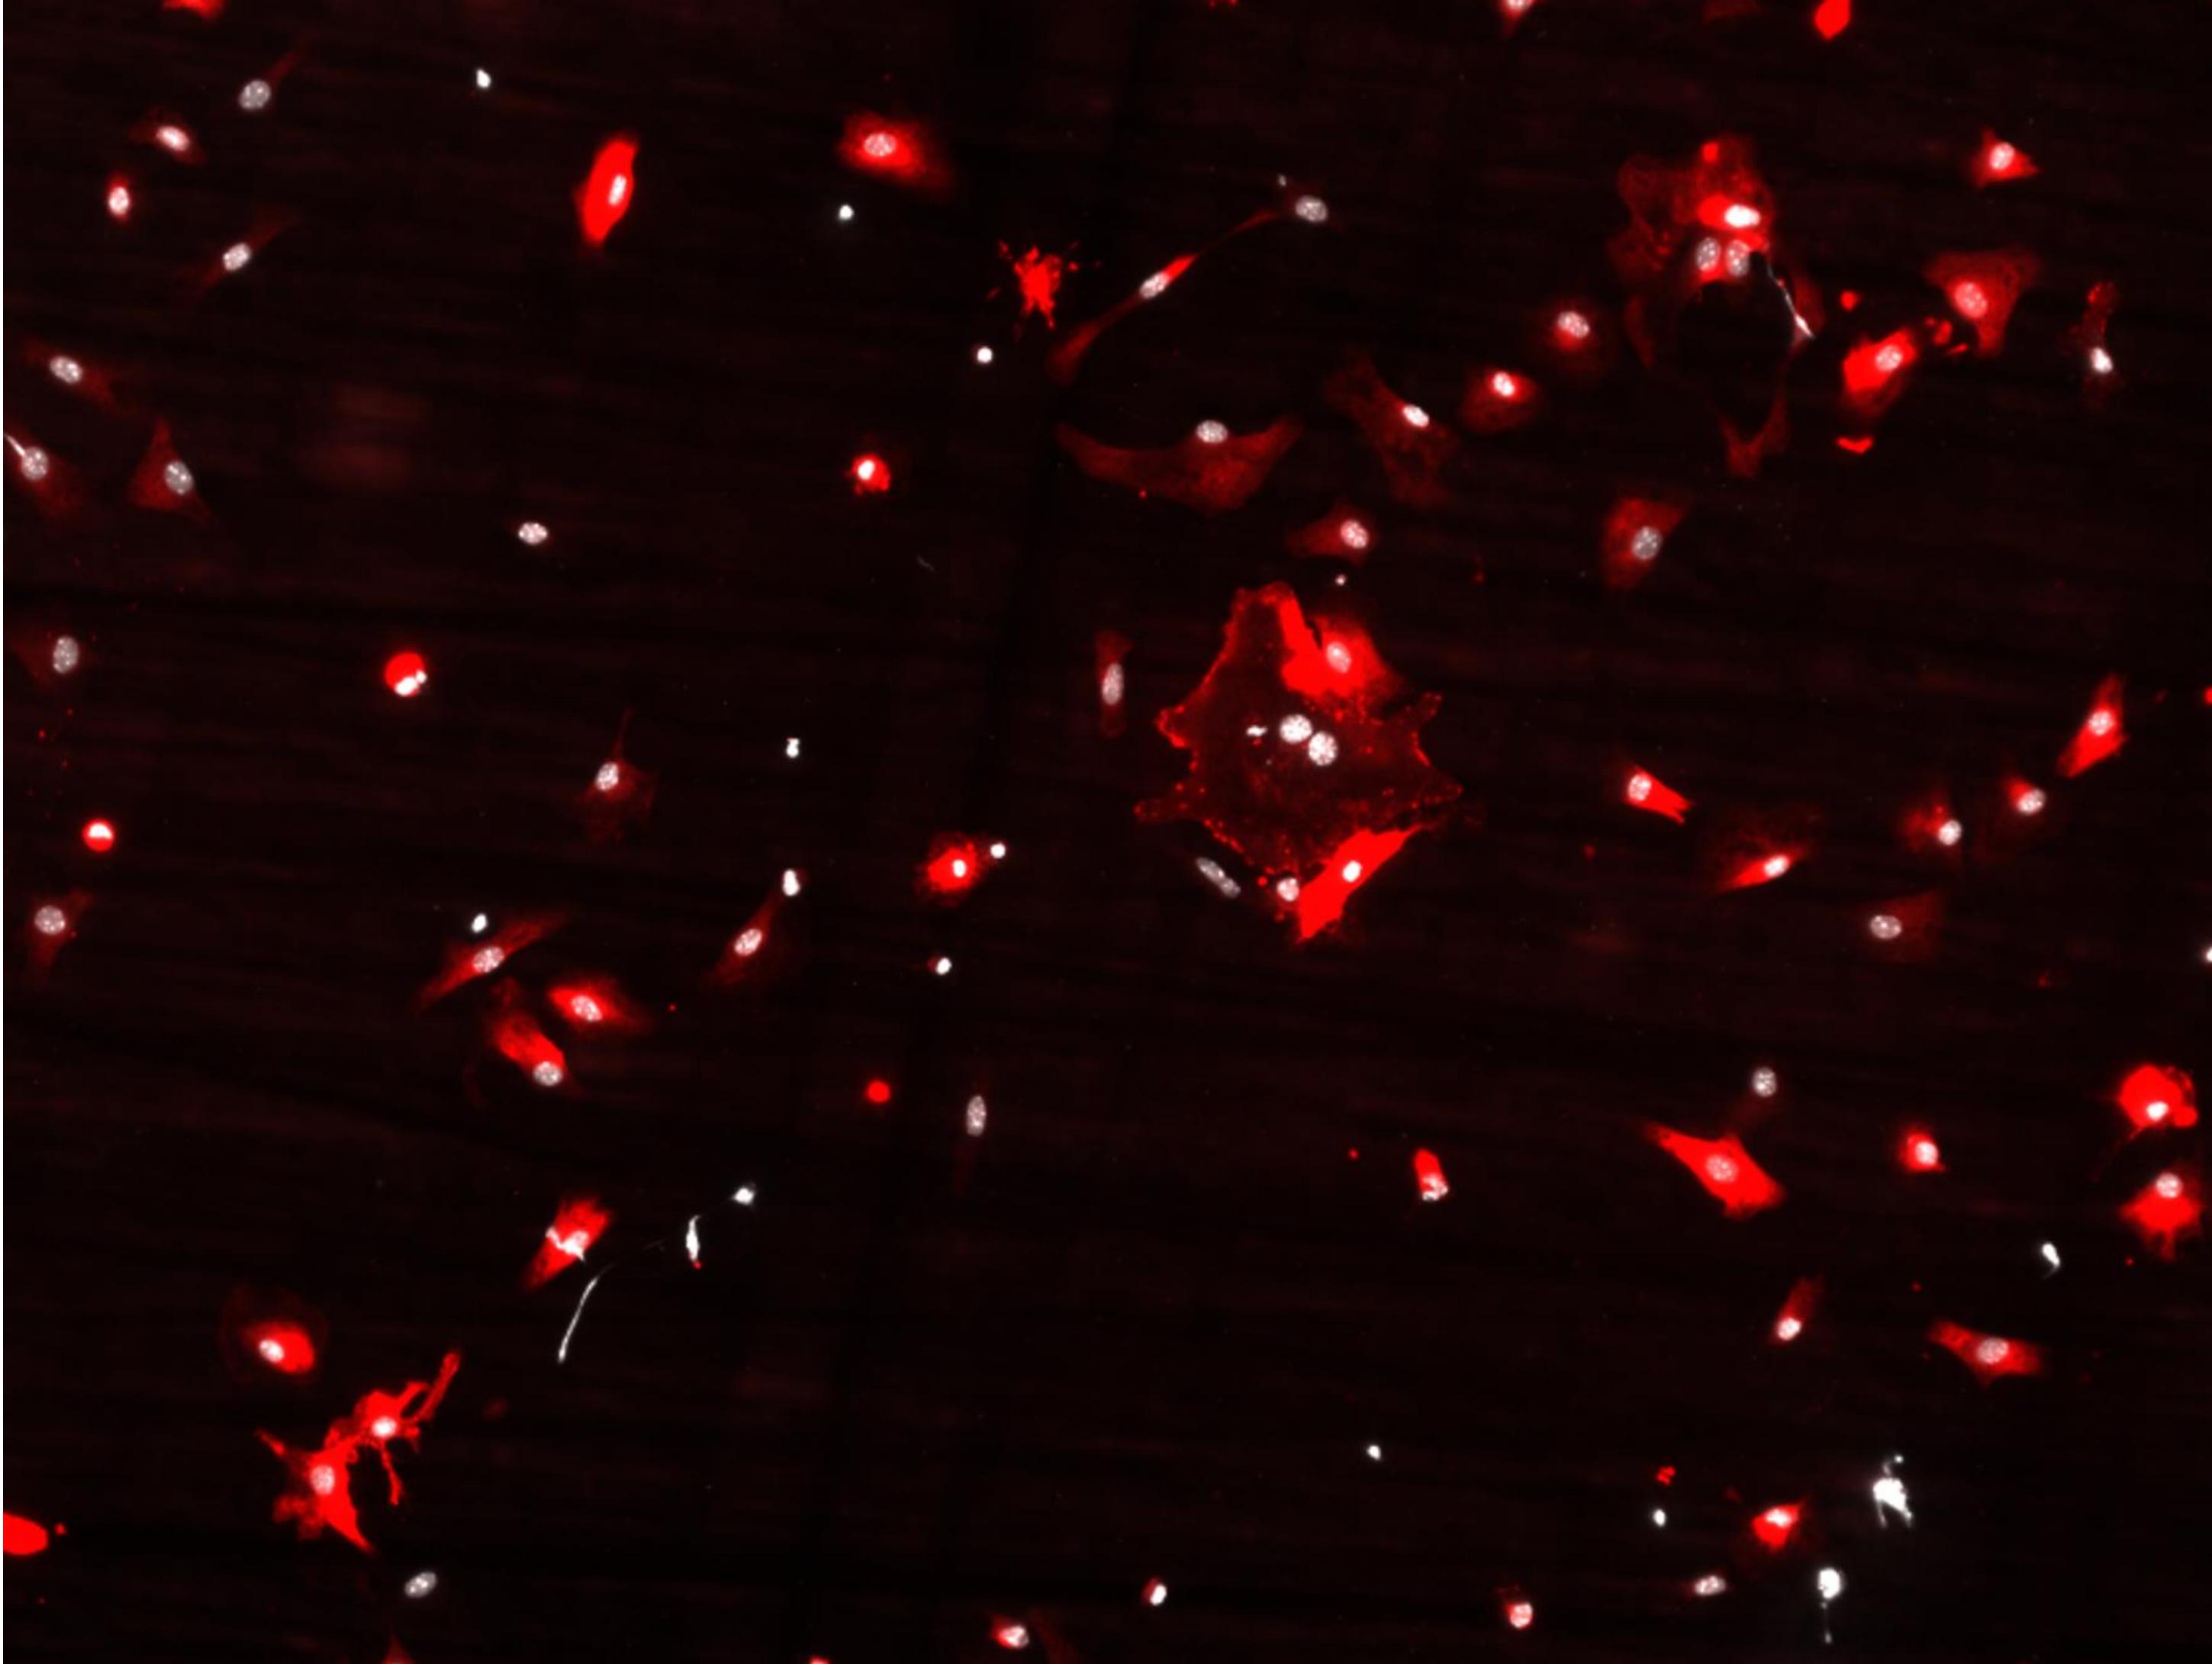

CD11c<sup>-/-</sup>

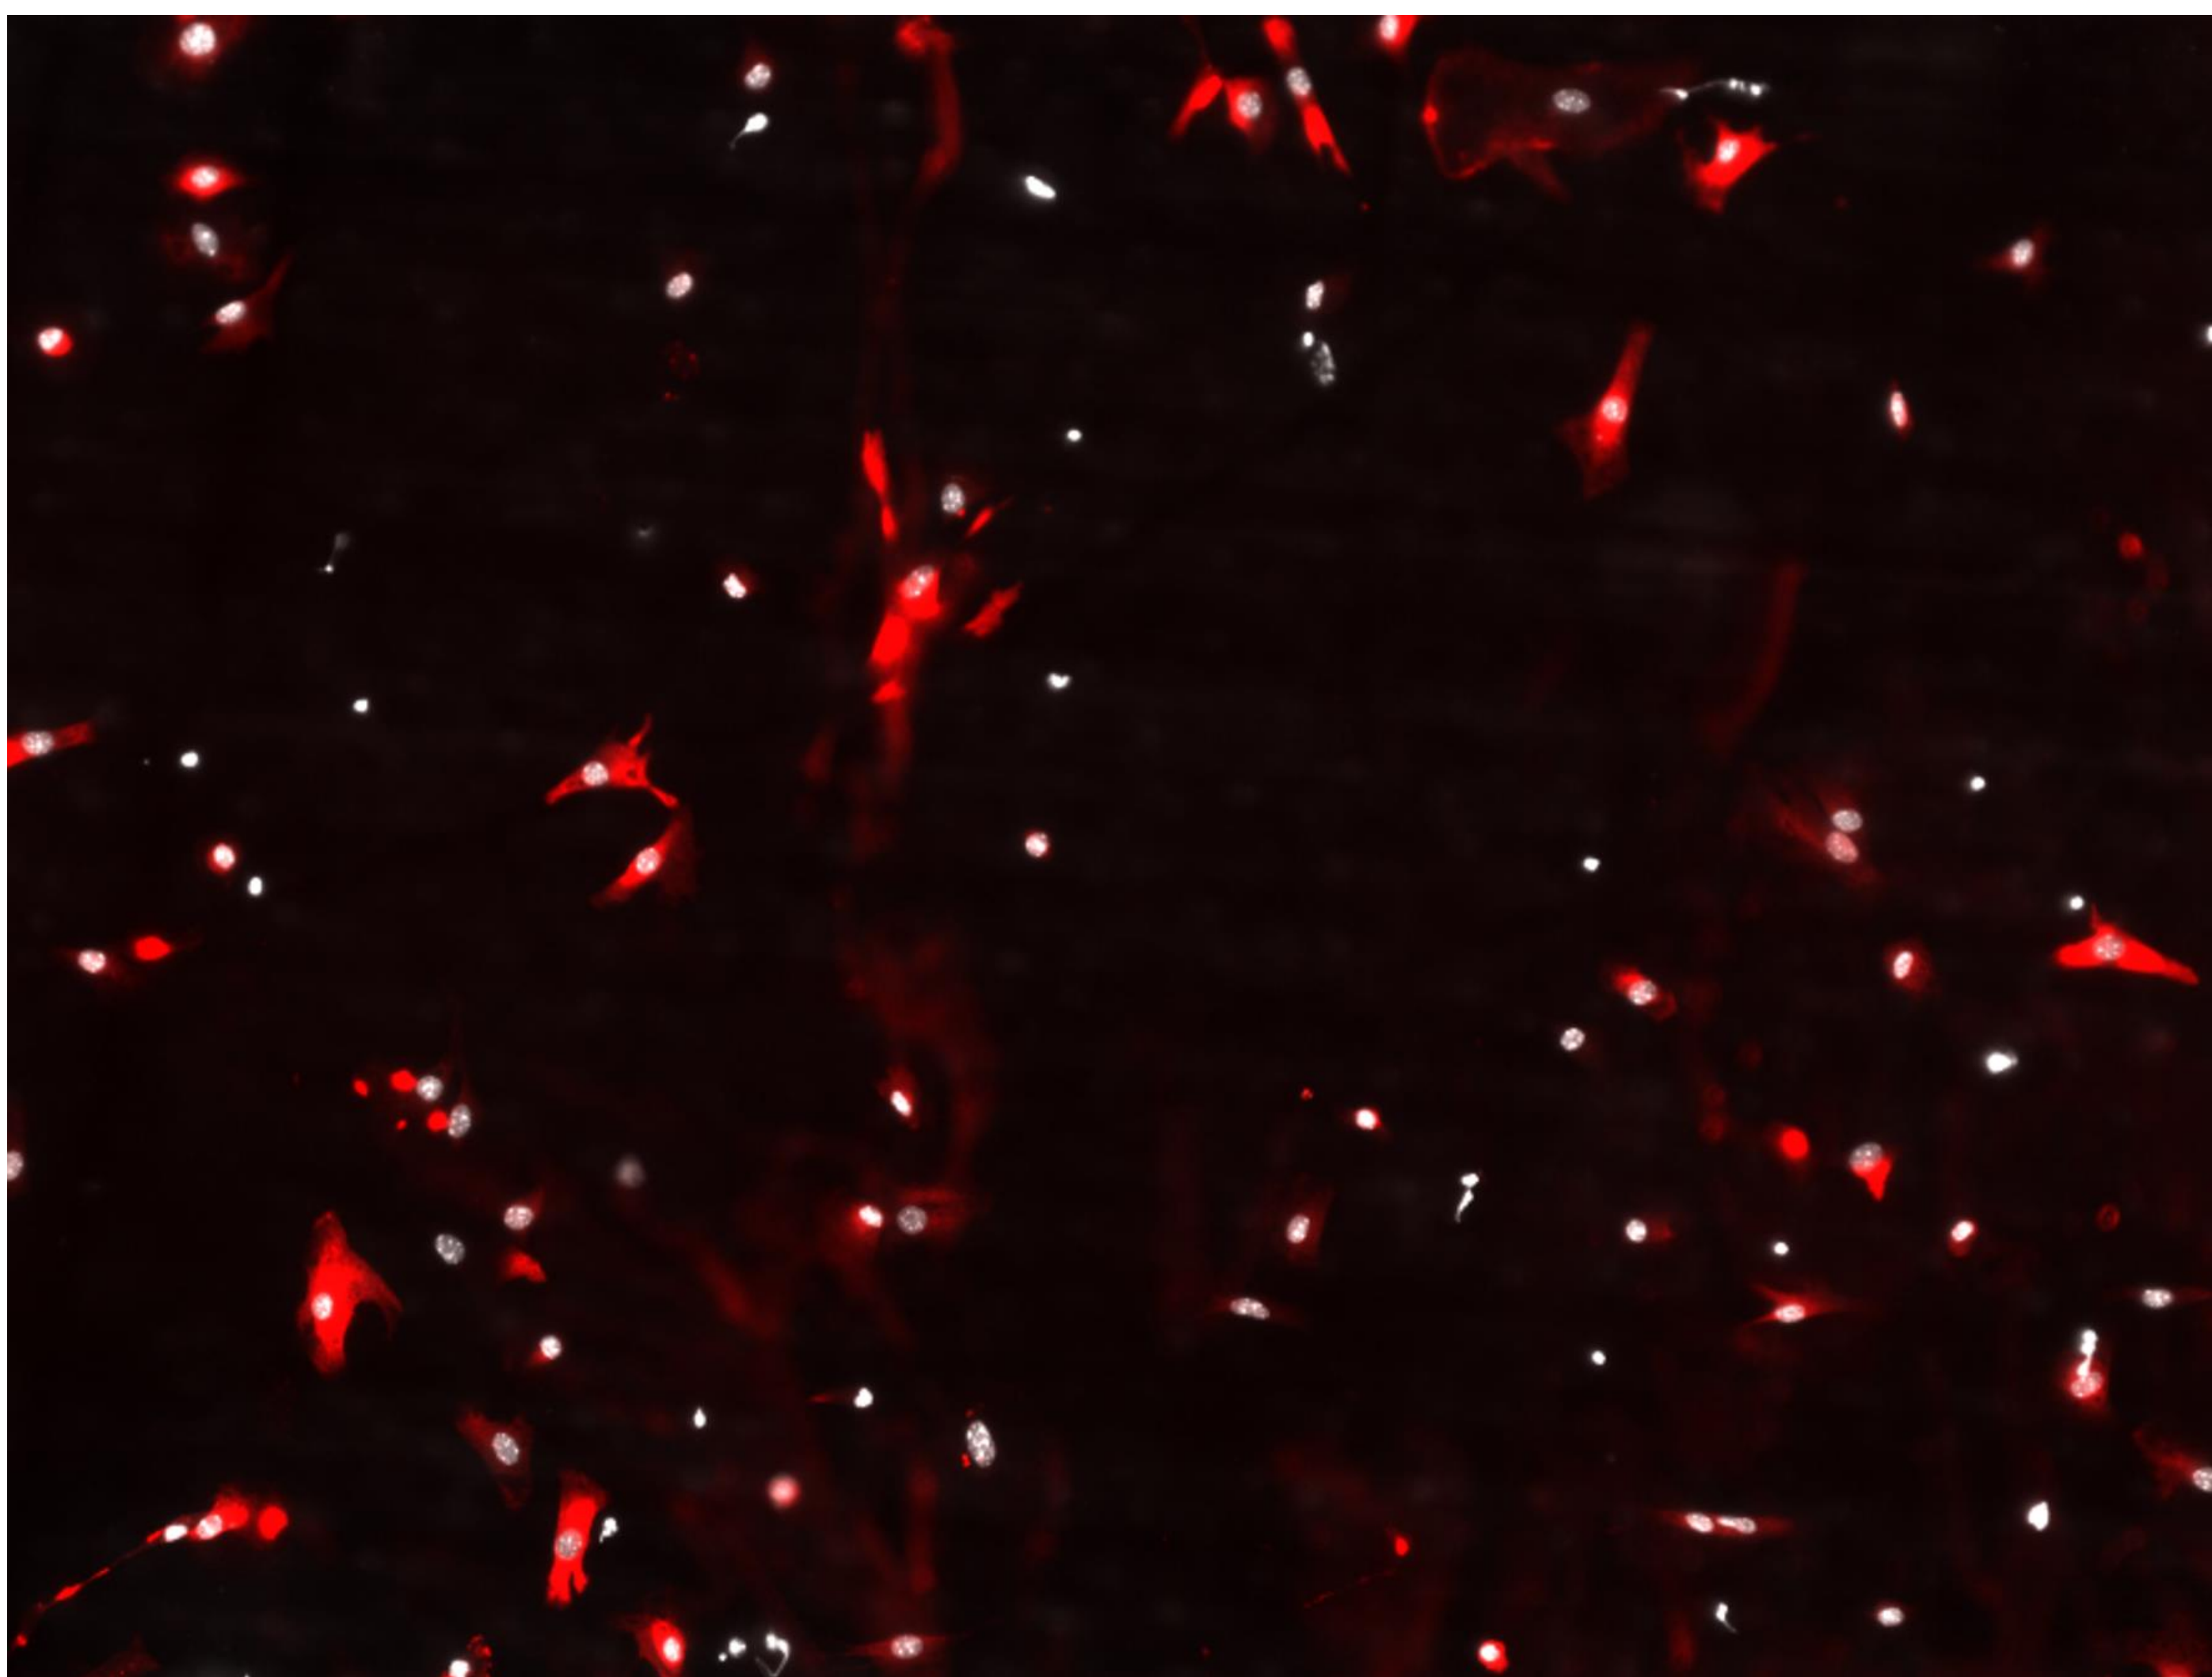

Unprocessed Images Figure 4A  
Liver, HE, male, obese, Scan

CD11c+/-

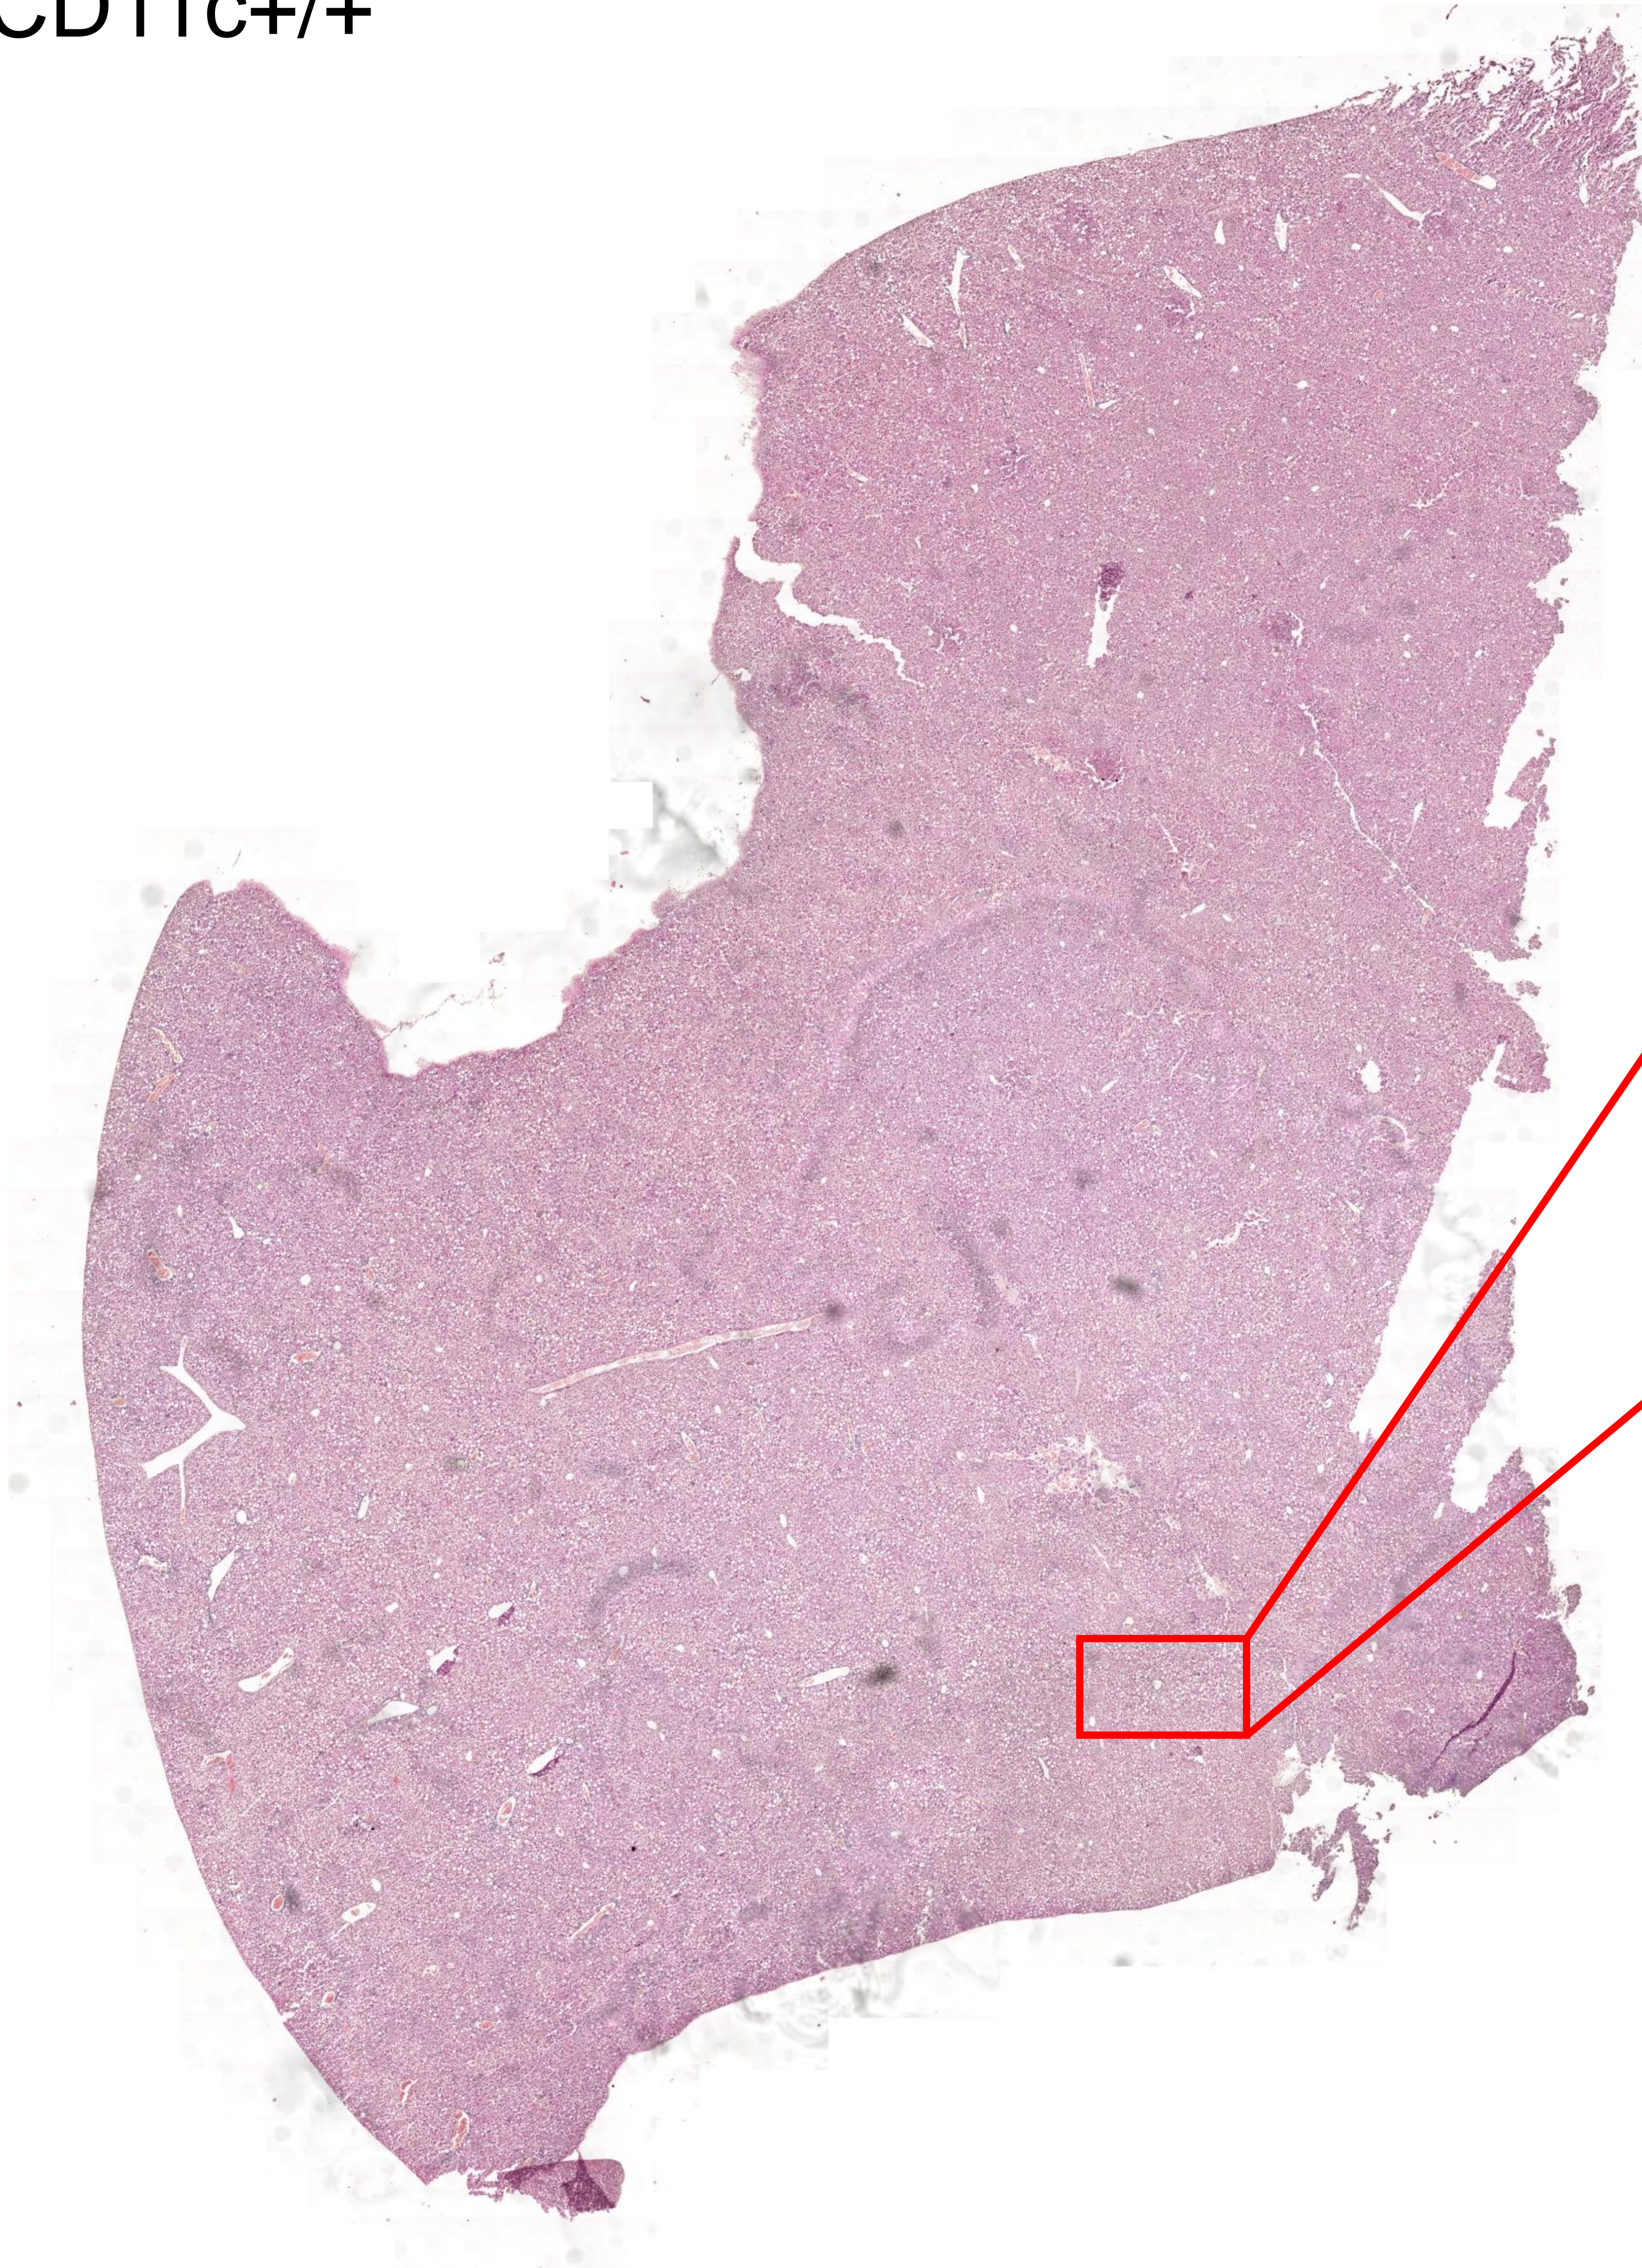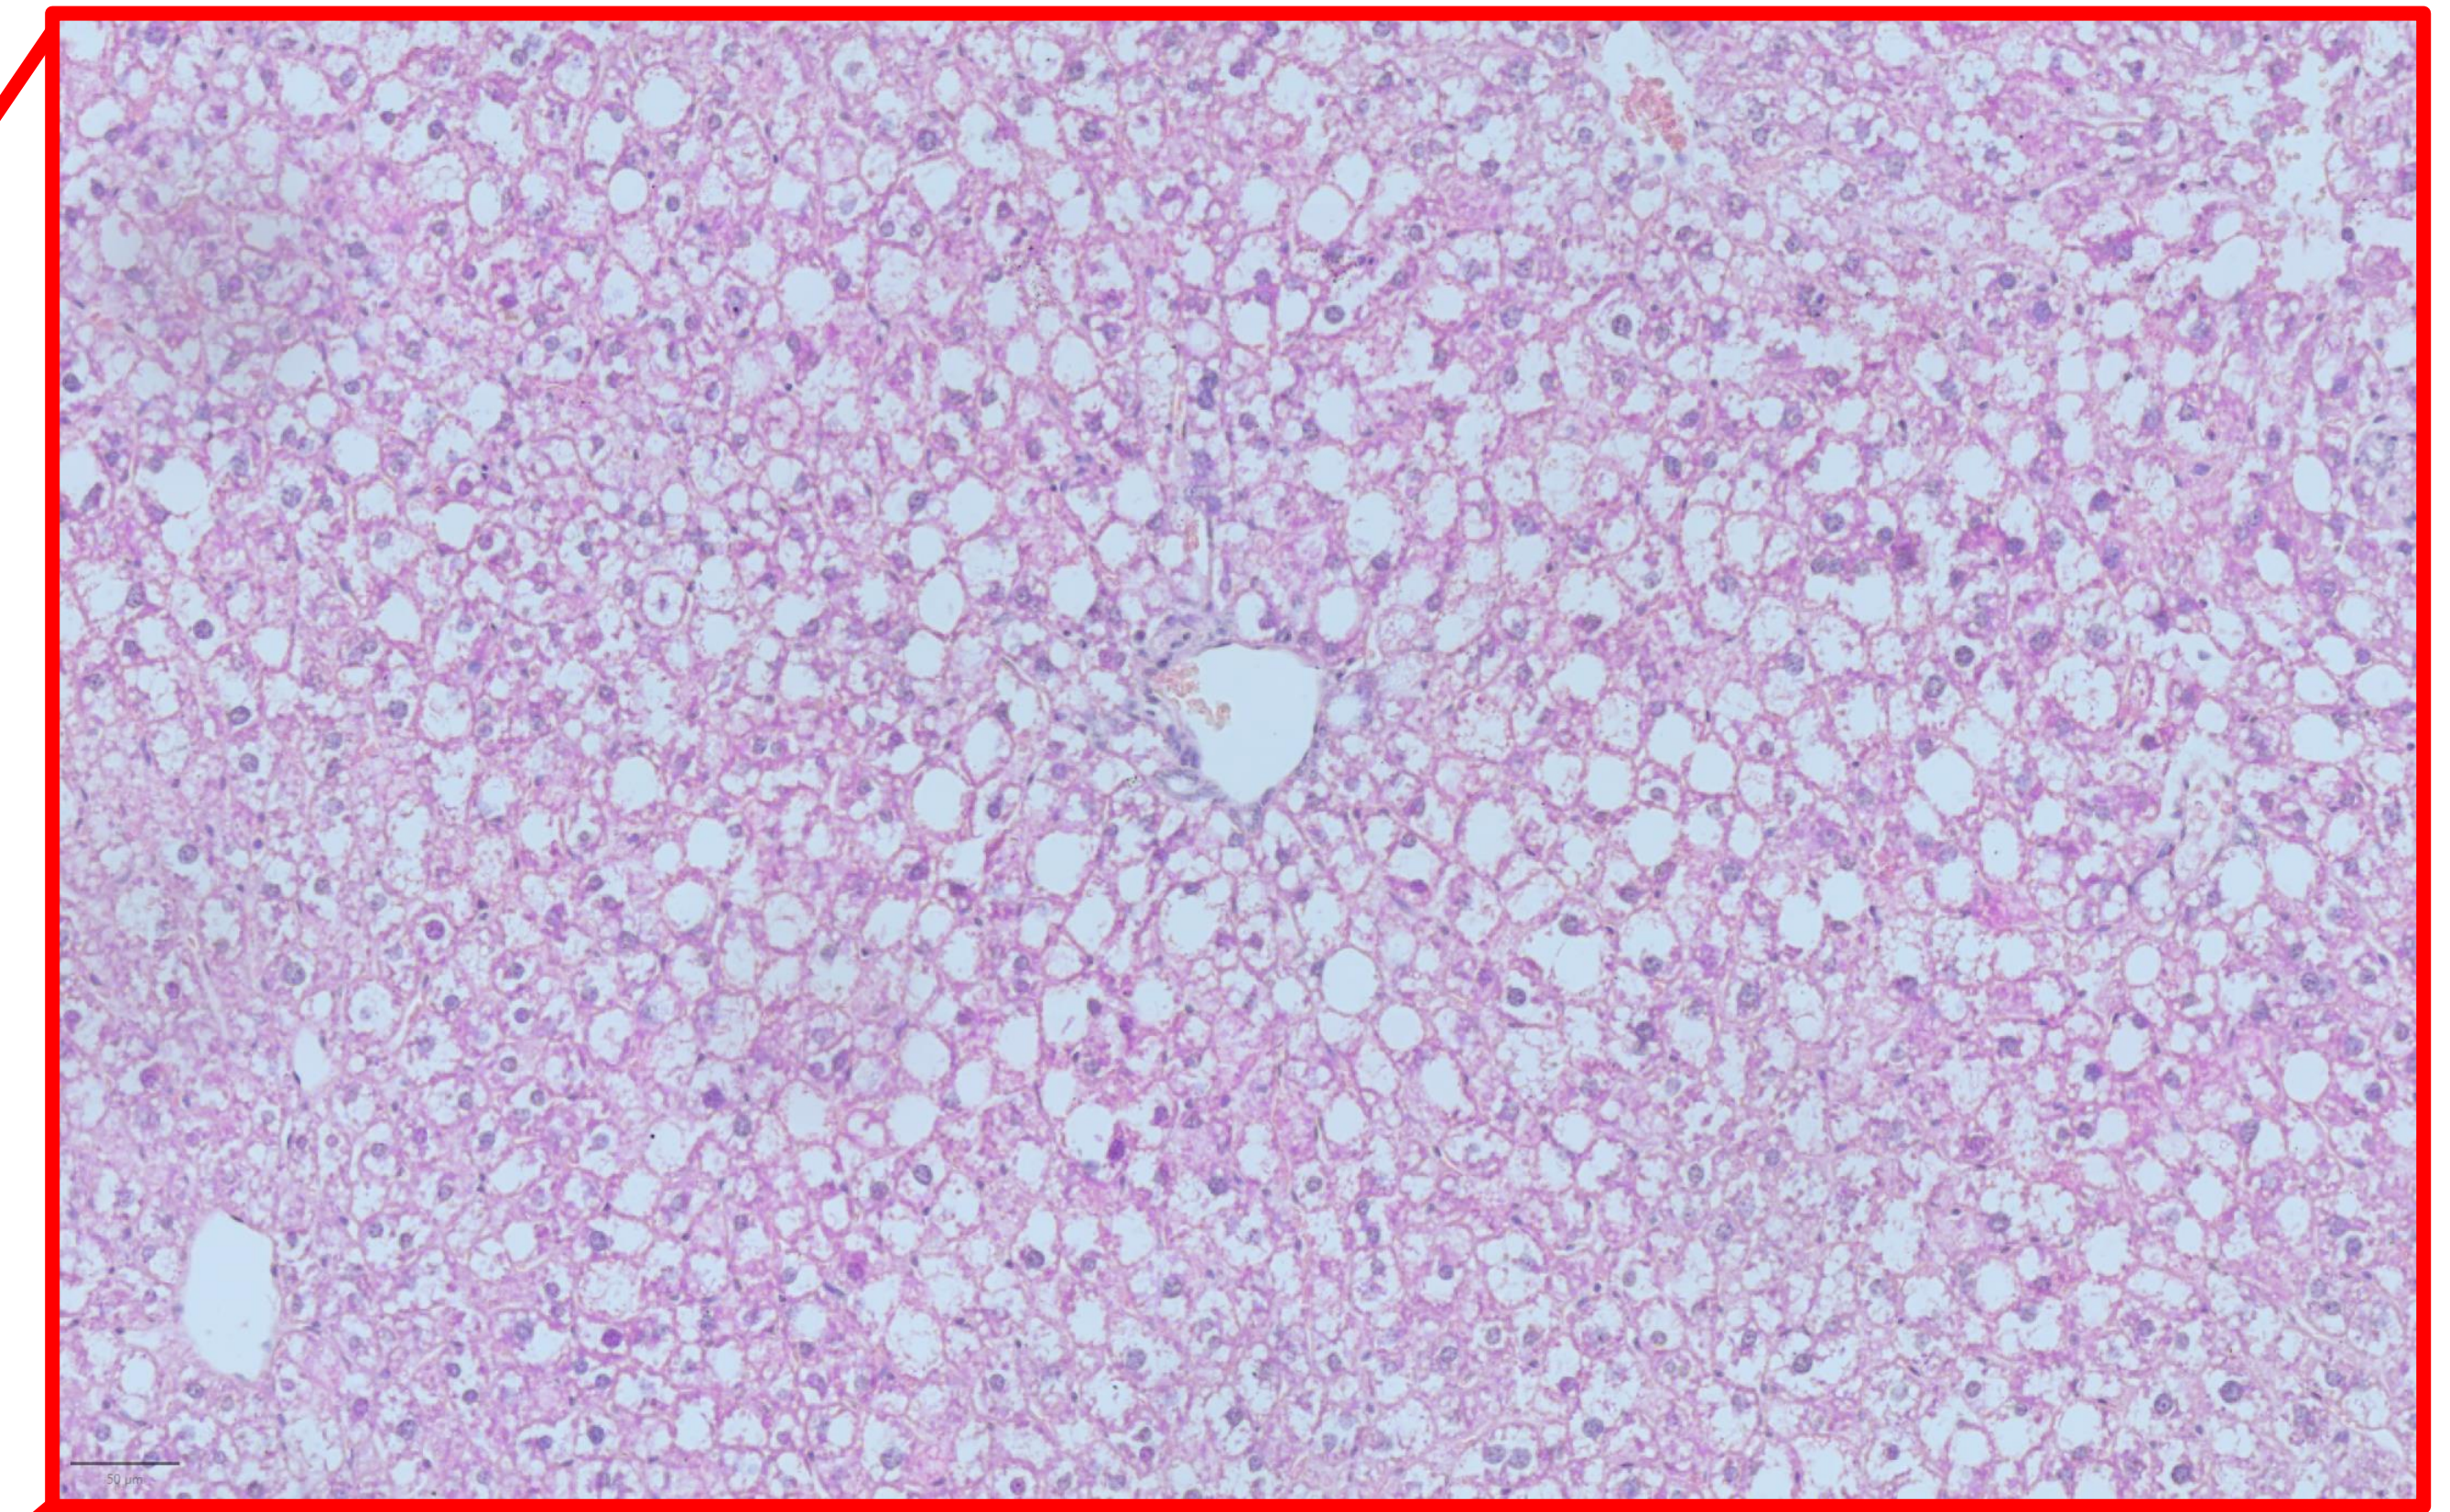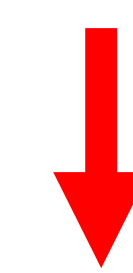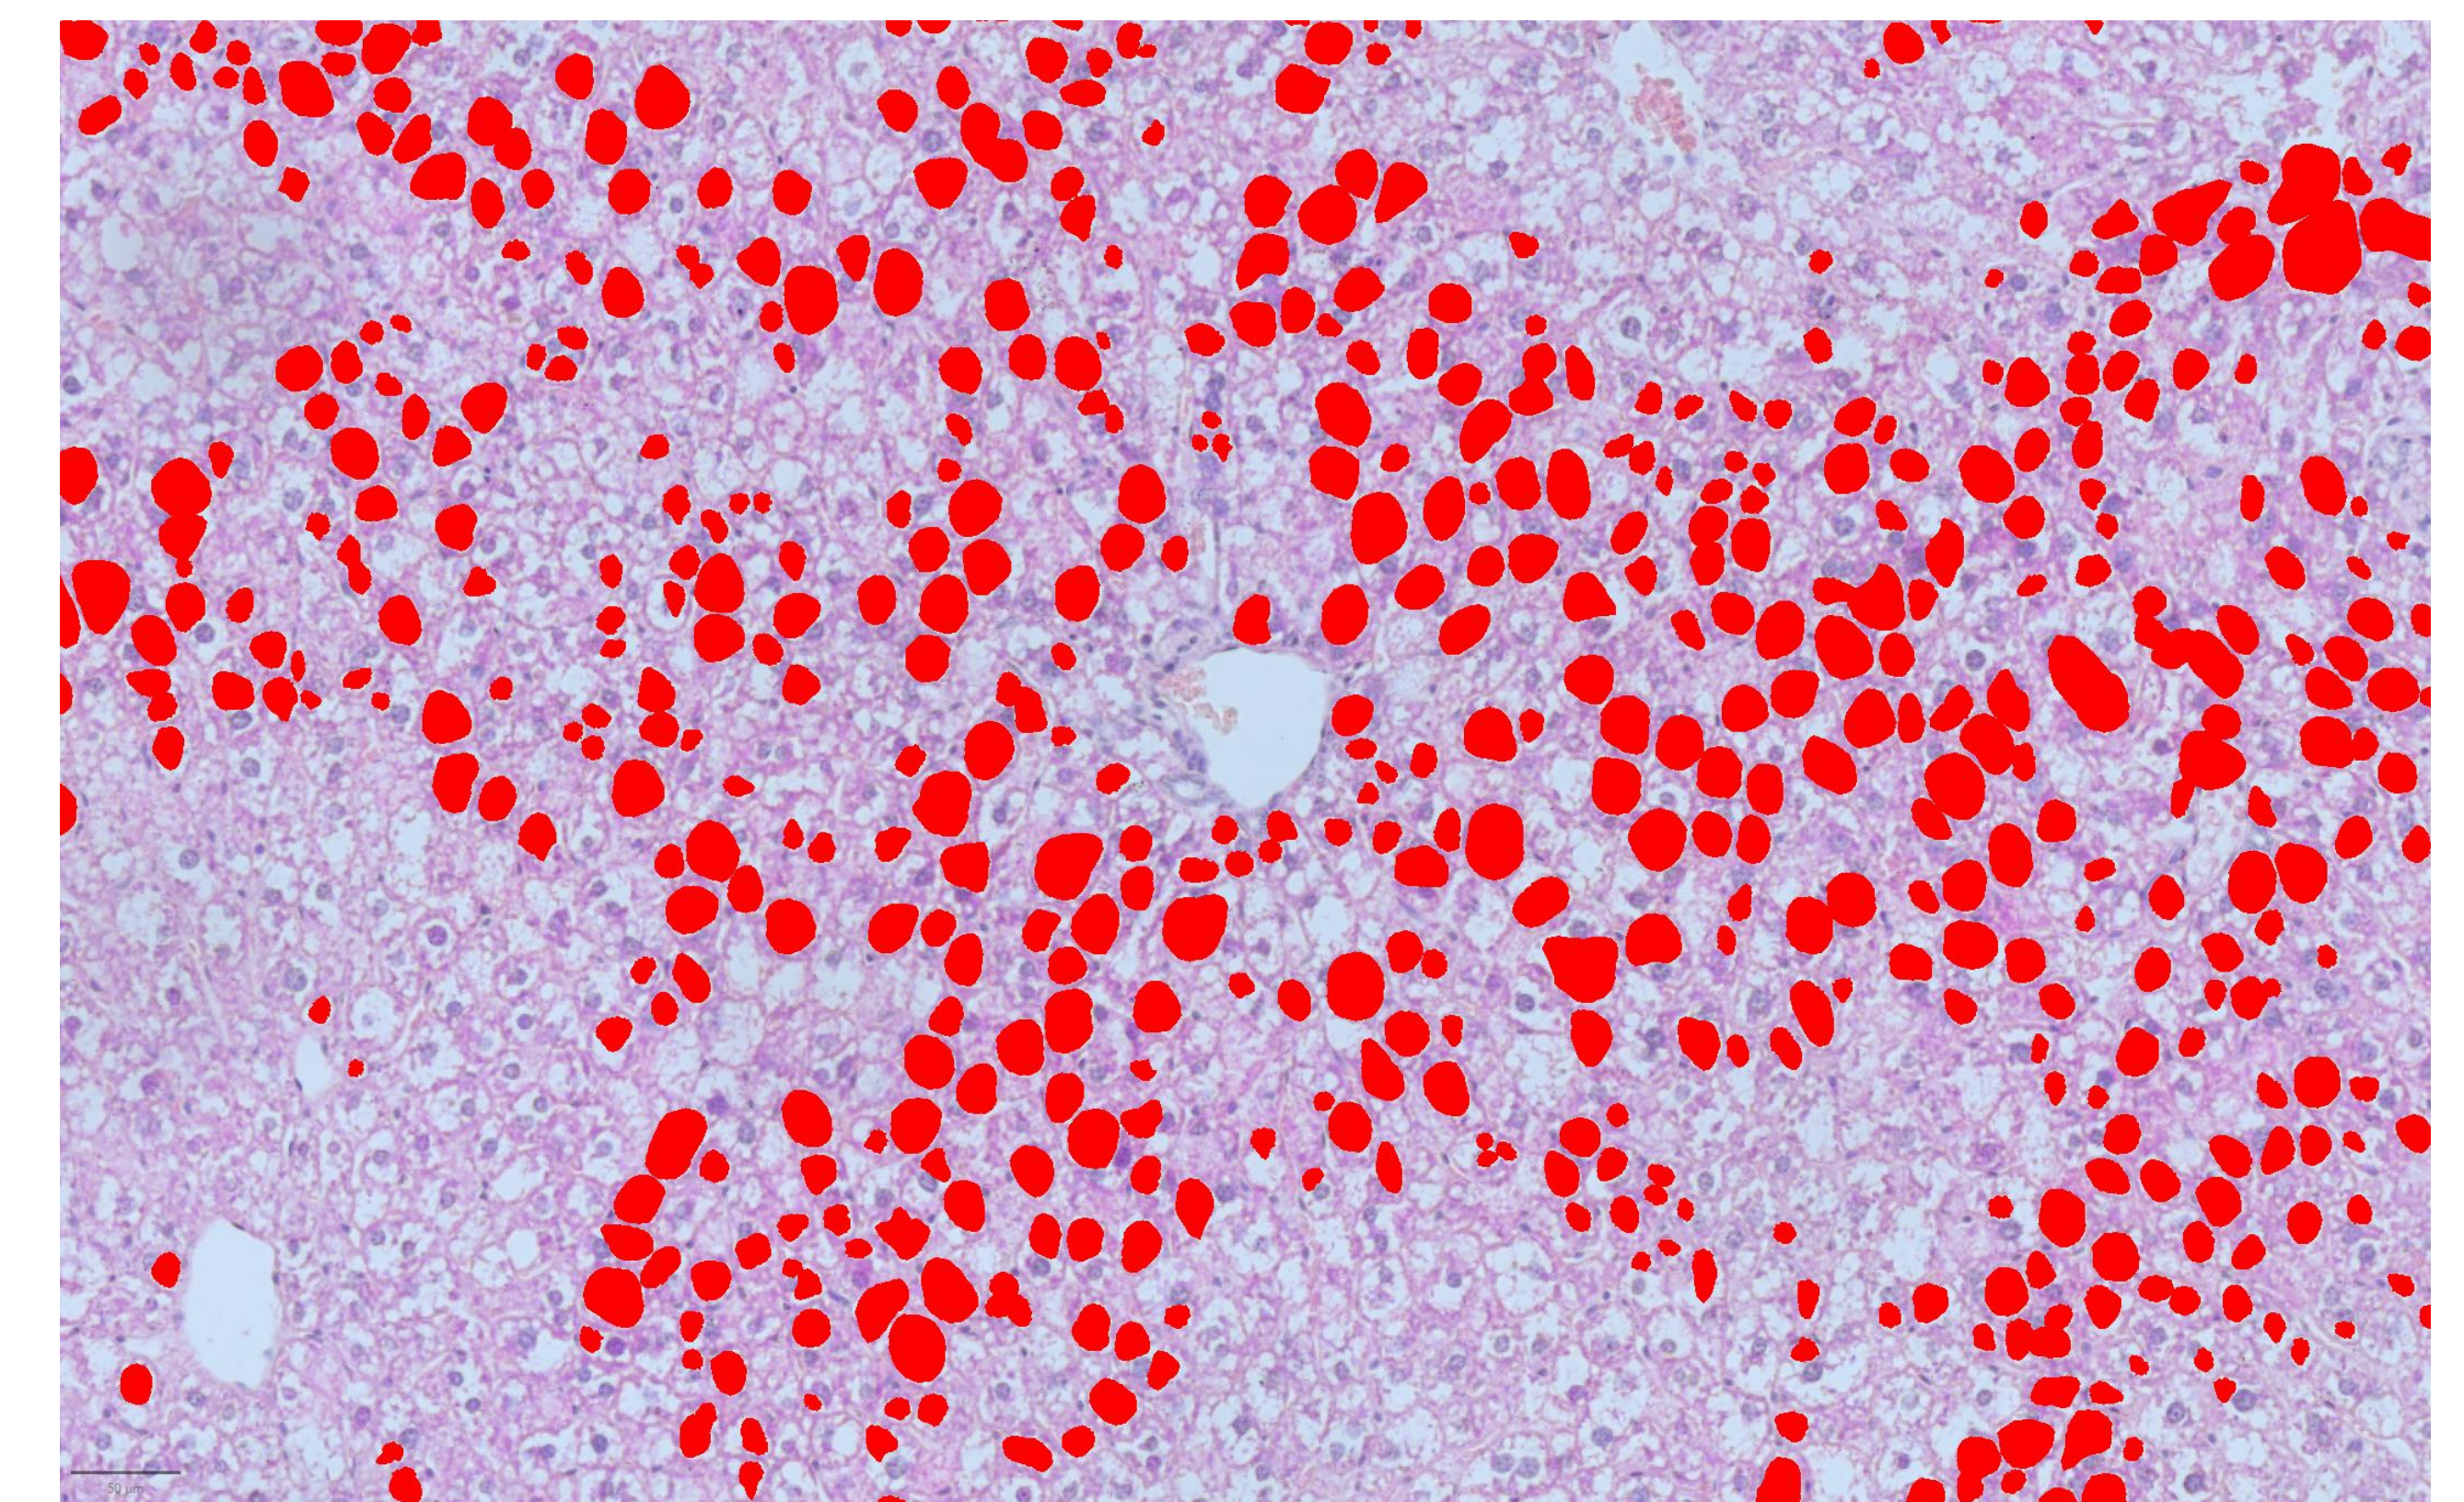

Unprocessed Images Figure 4A  
Liver, HE, male, obese

CD11c-/-

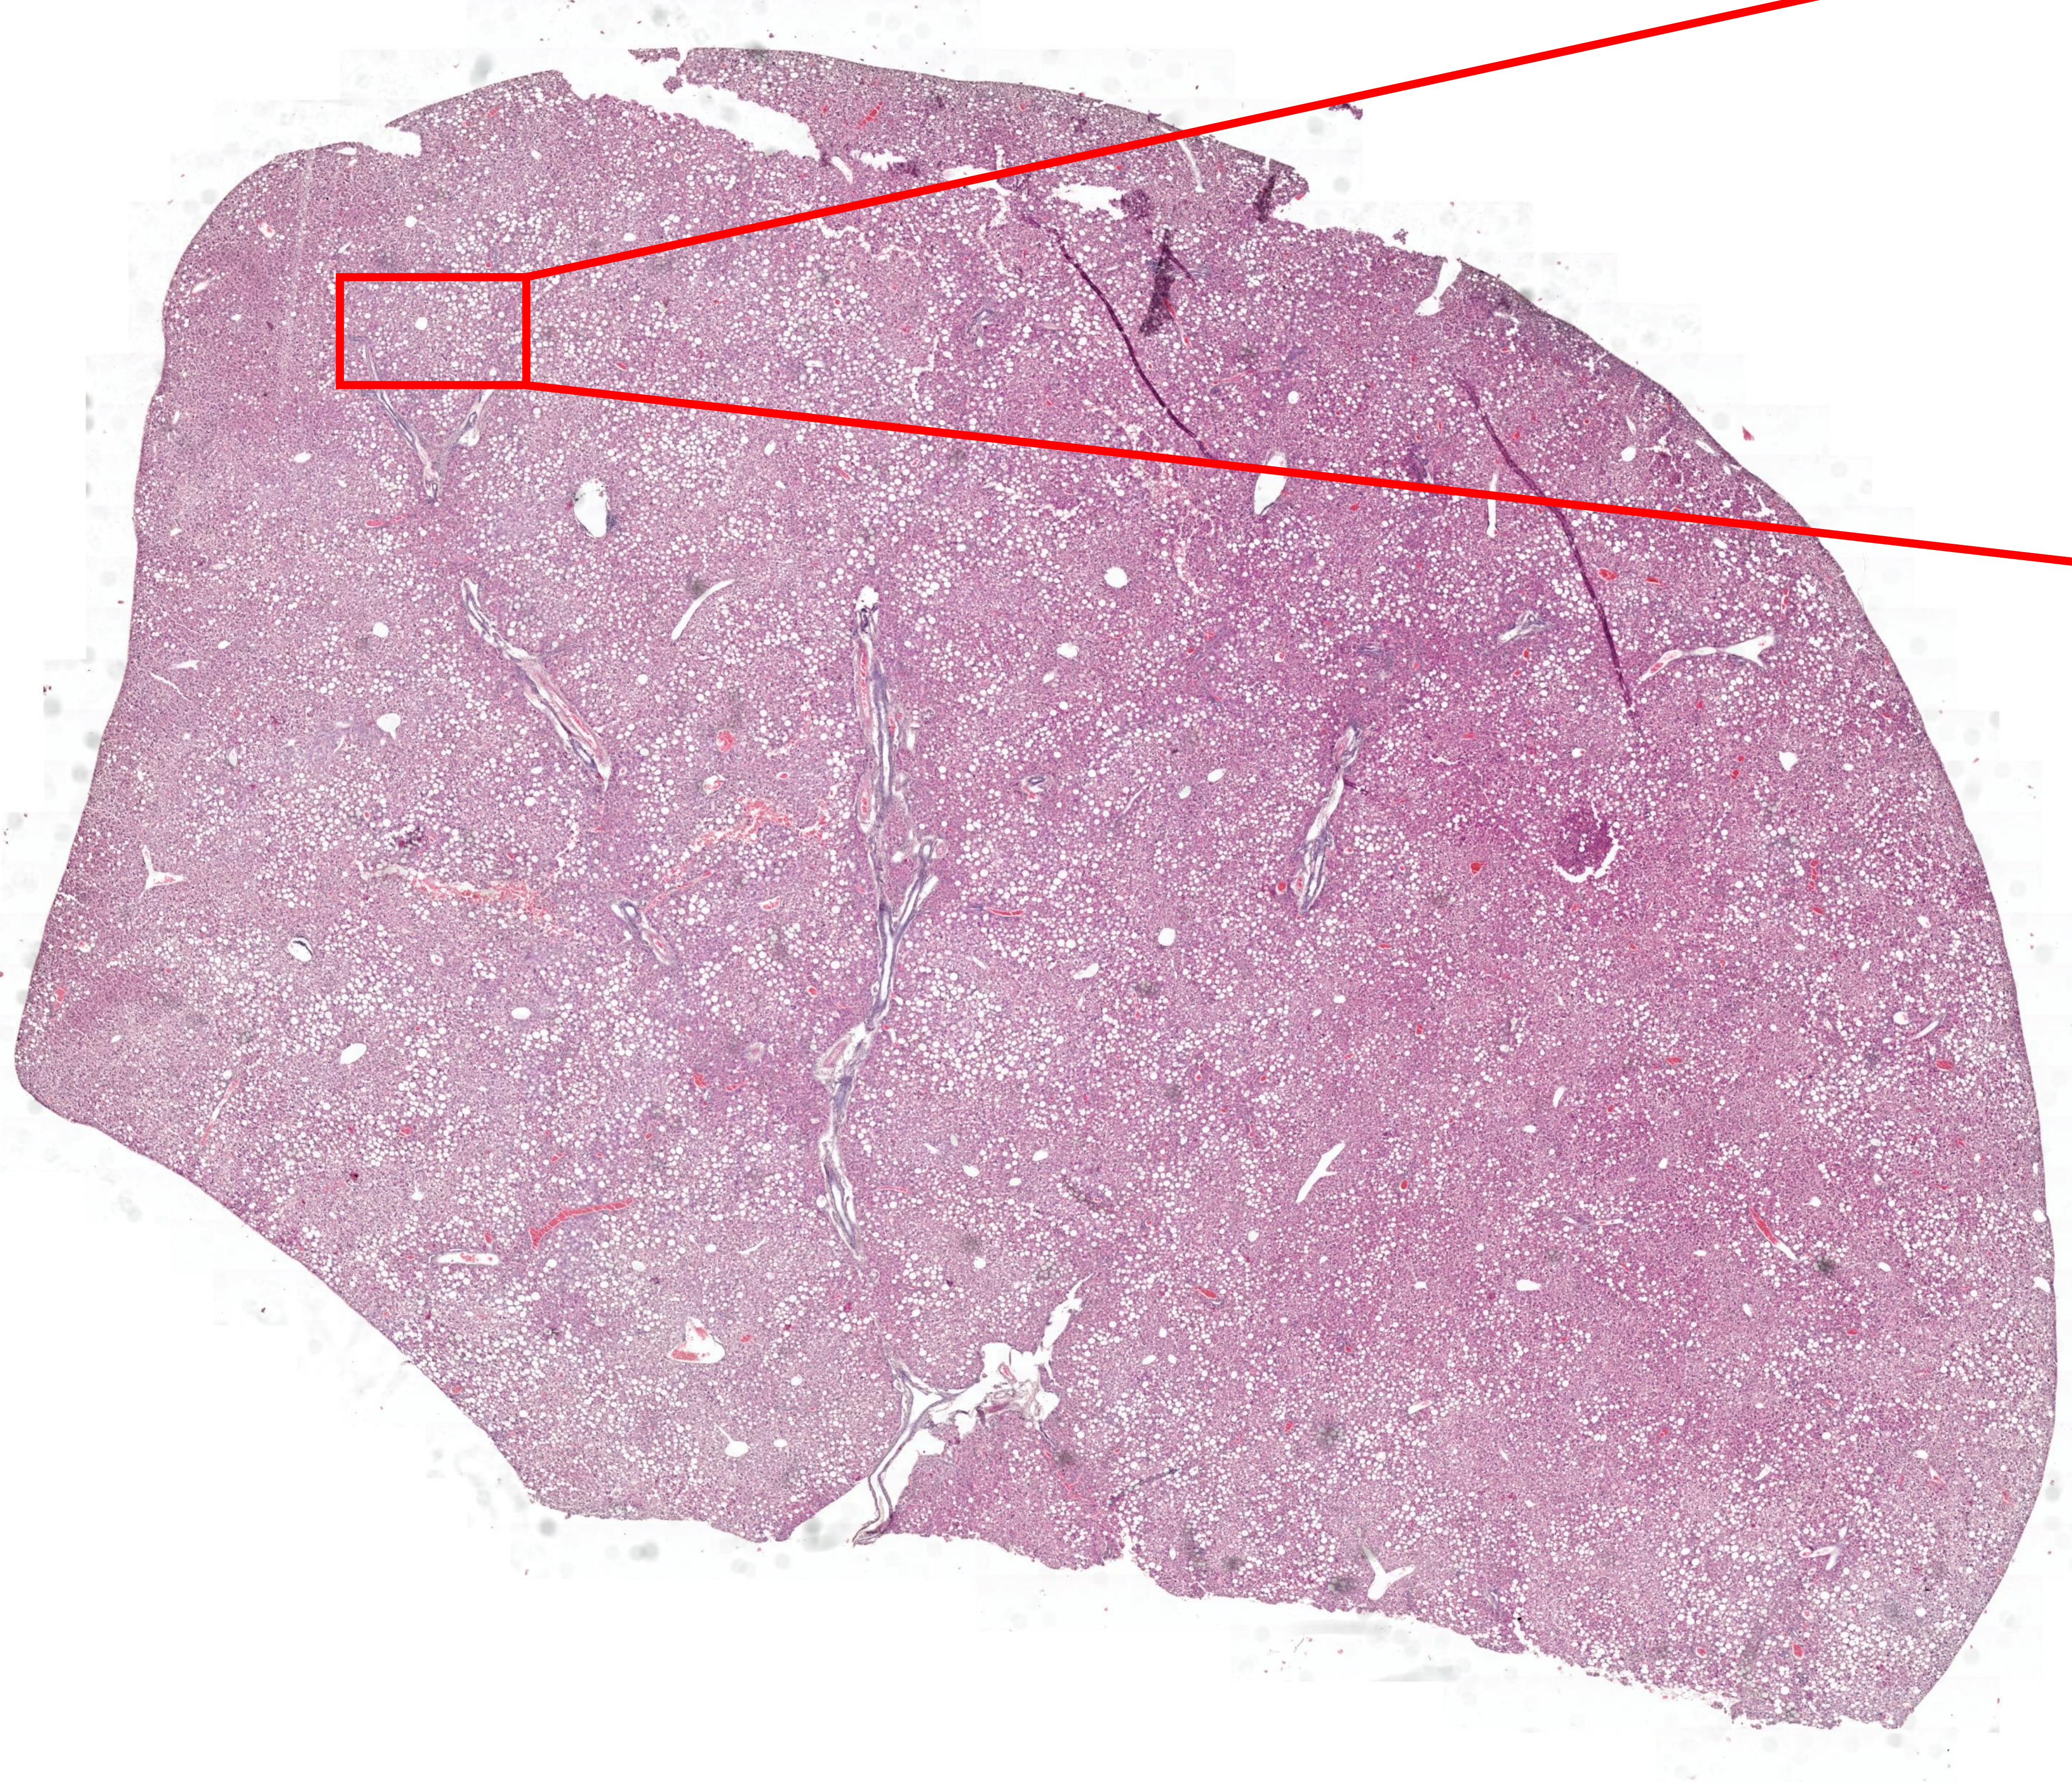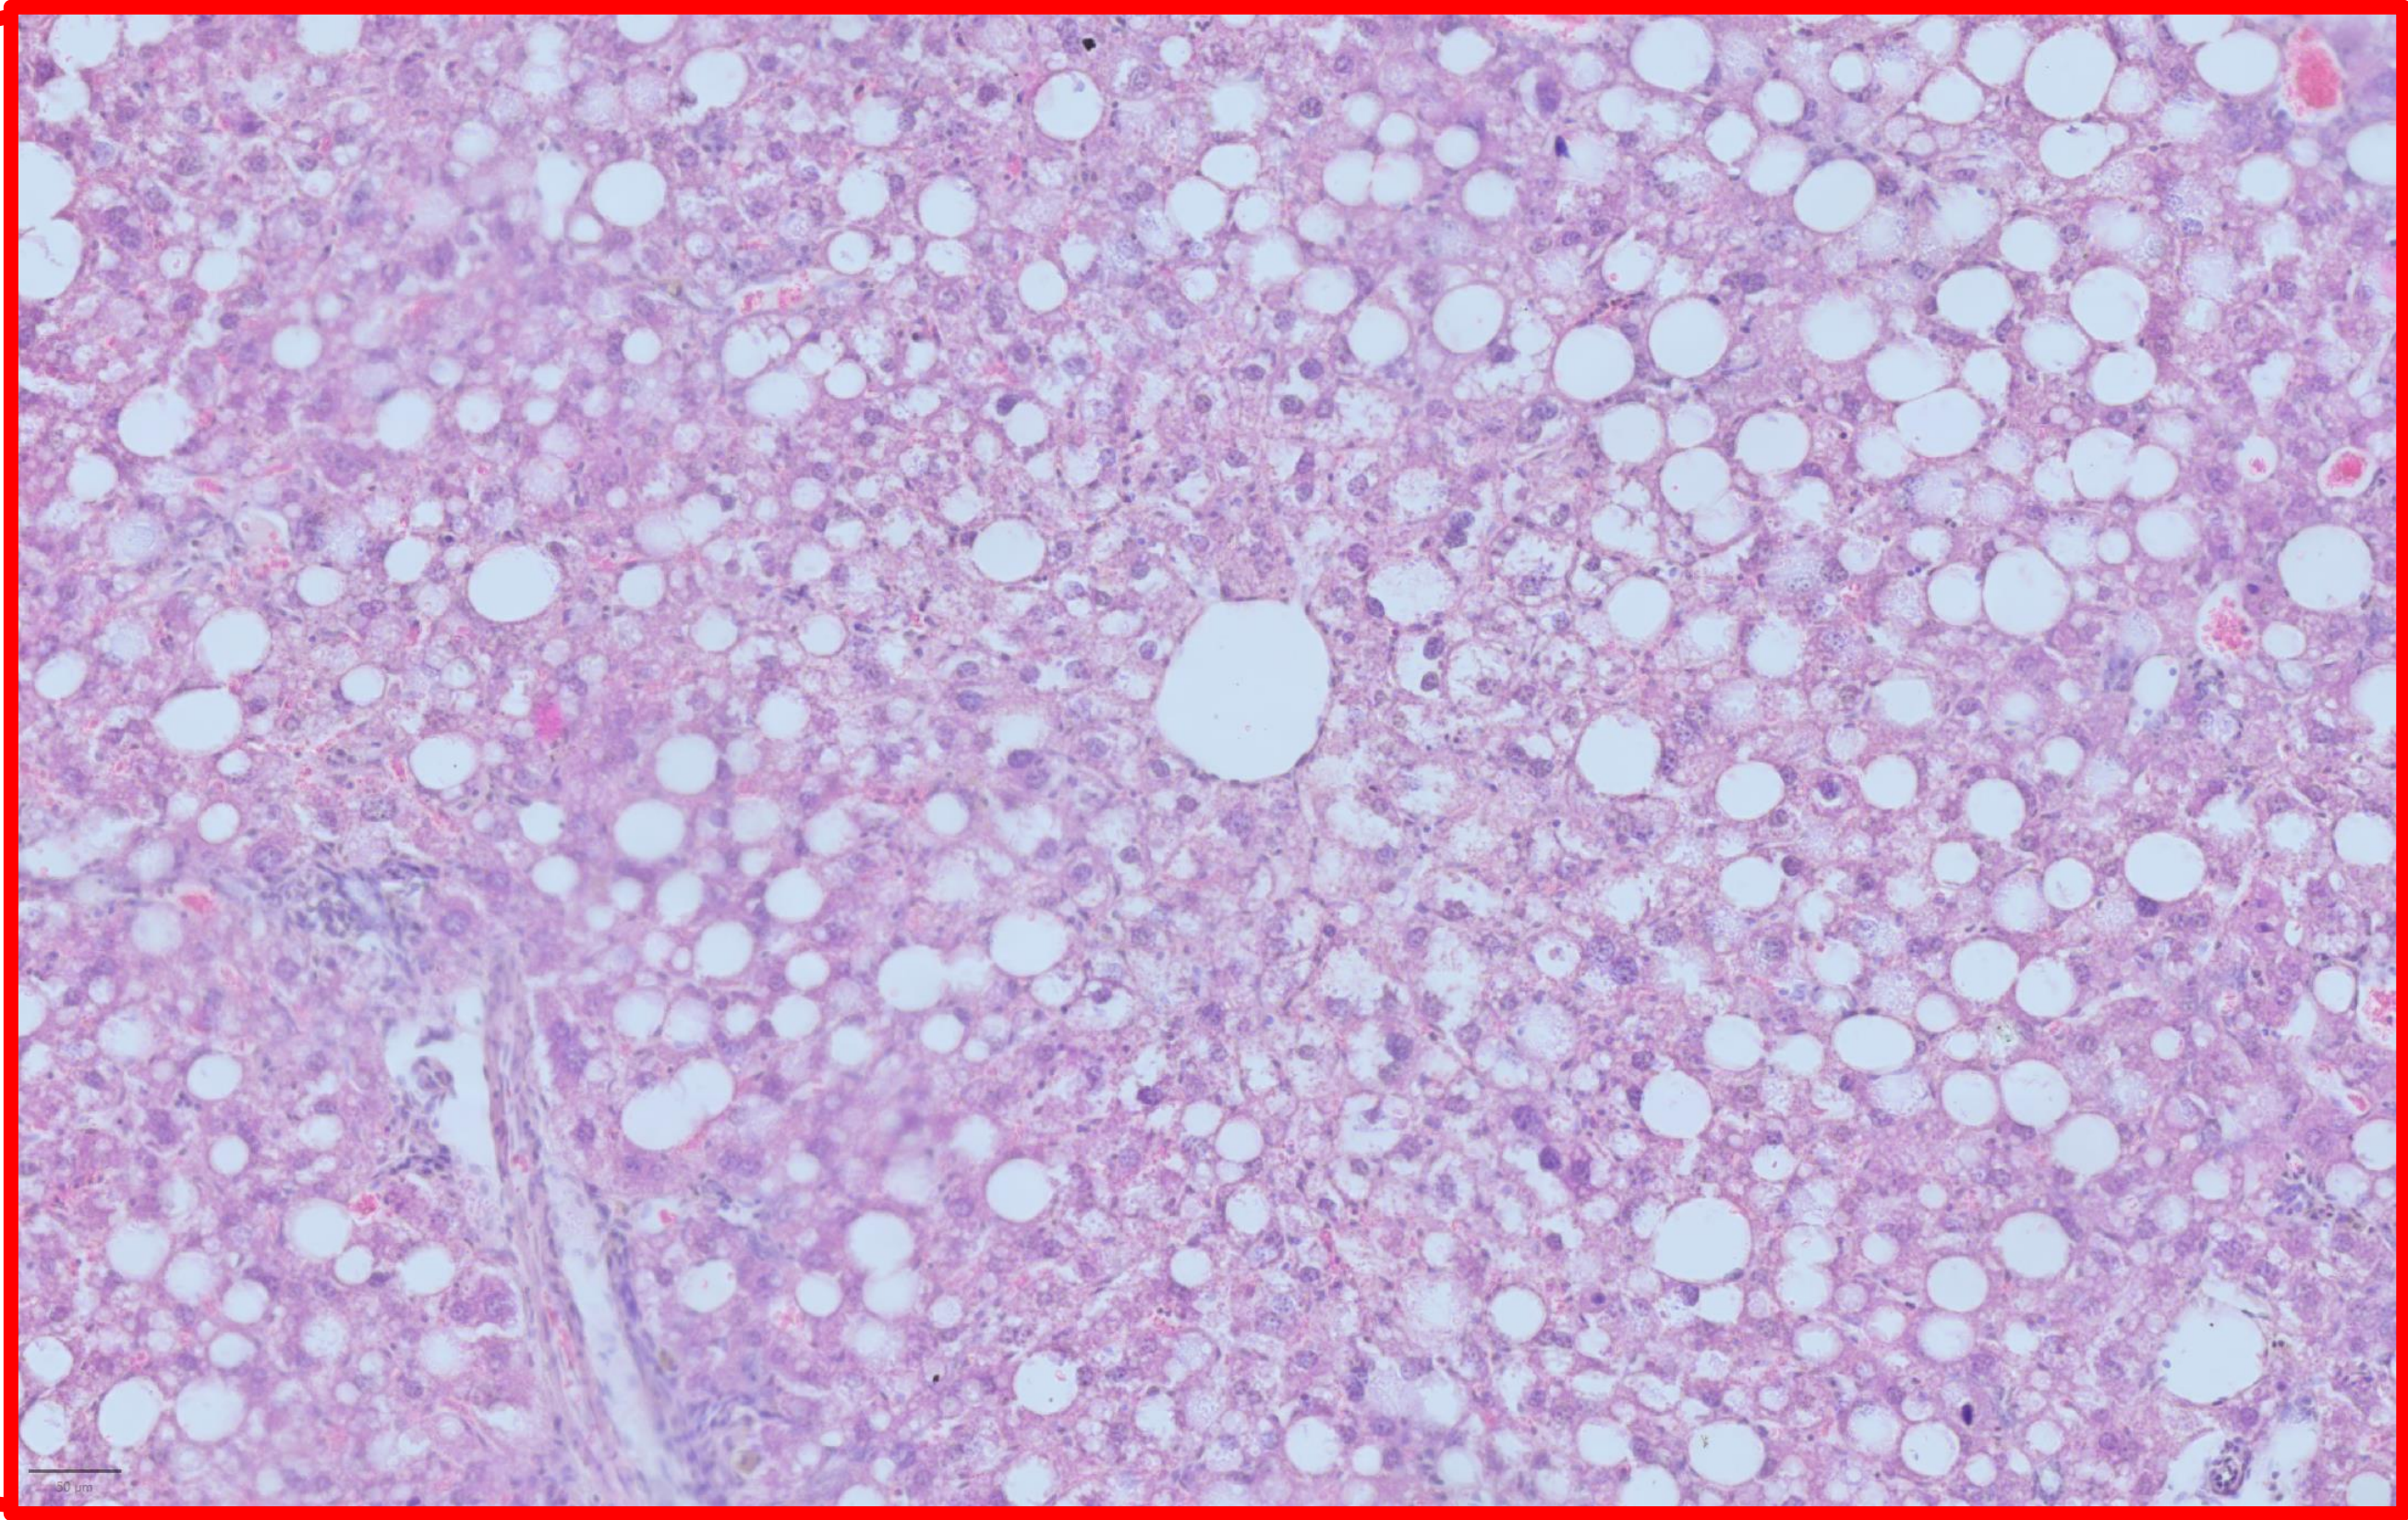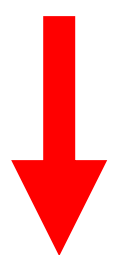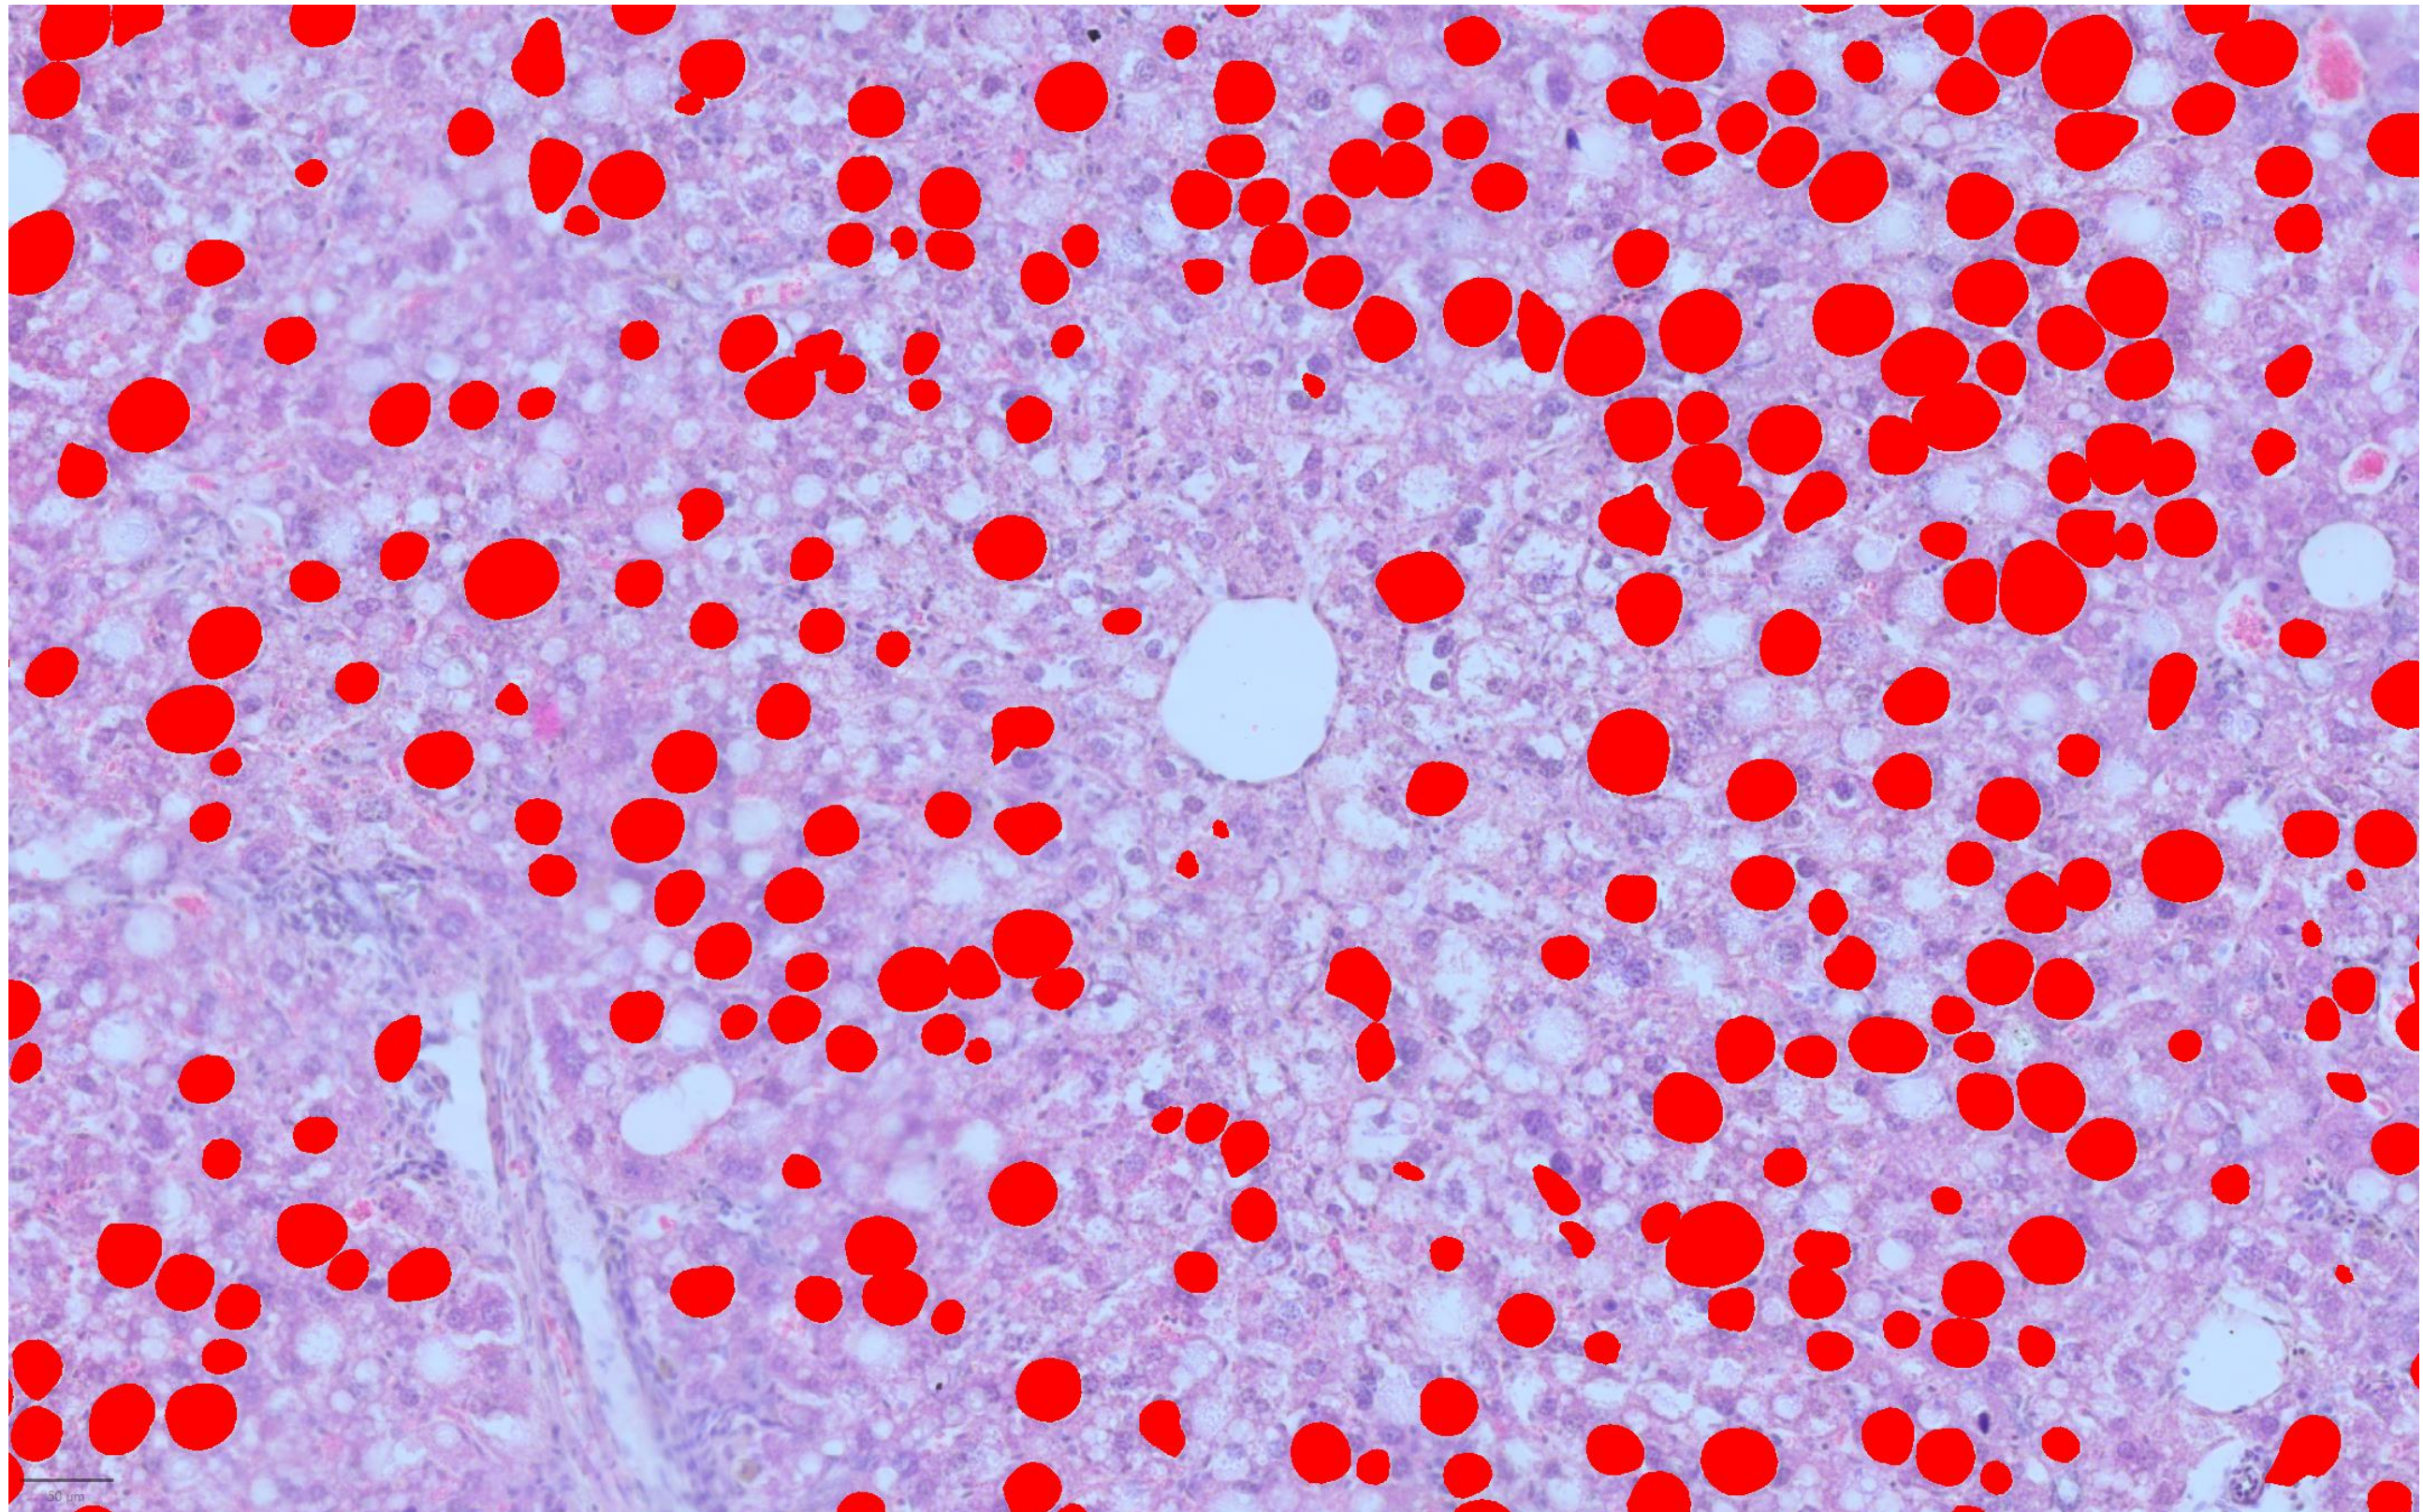

Unprocessed Images Figure 4B  
Liver, HE, male, obese, brightfield, 10x

CD11c<sup>+/+</sup>

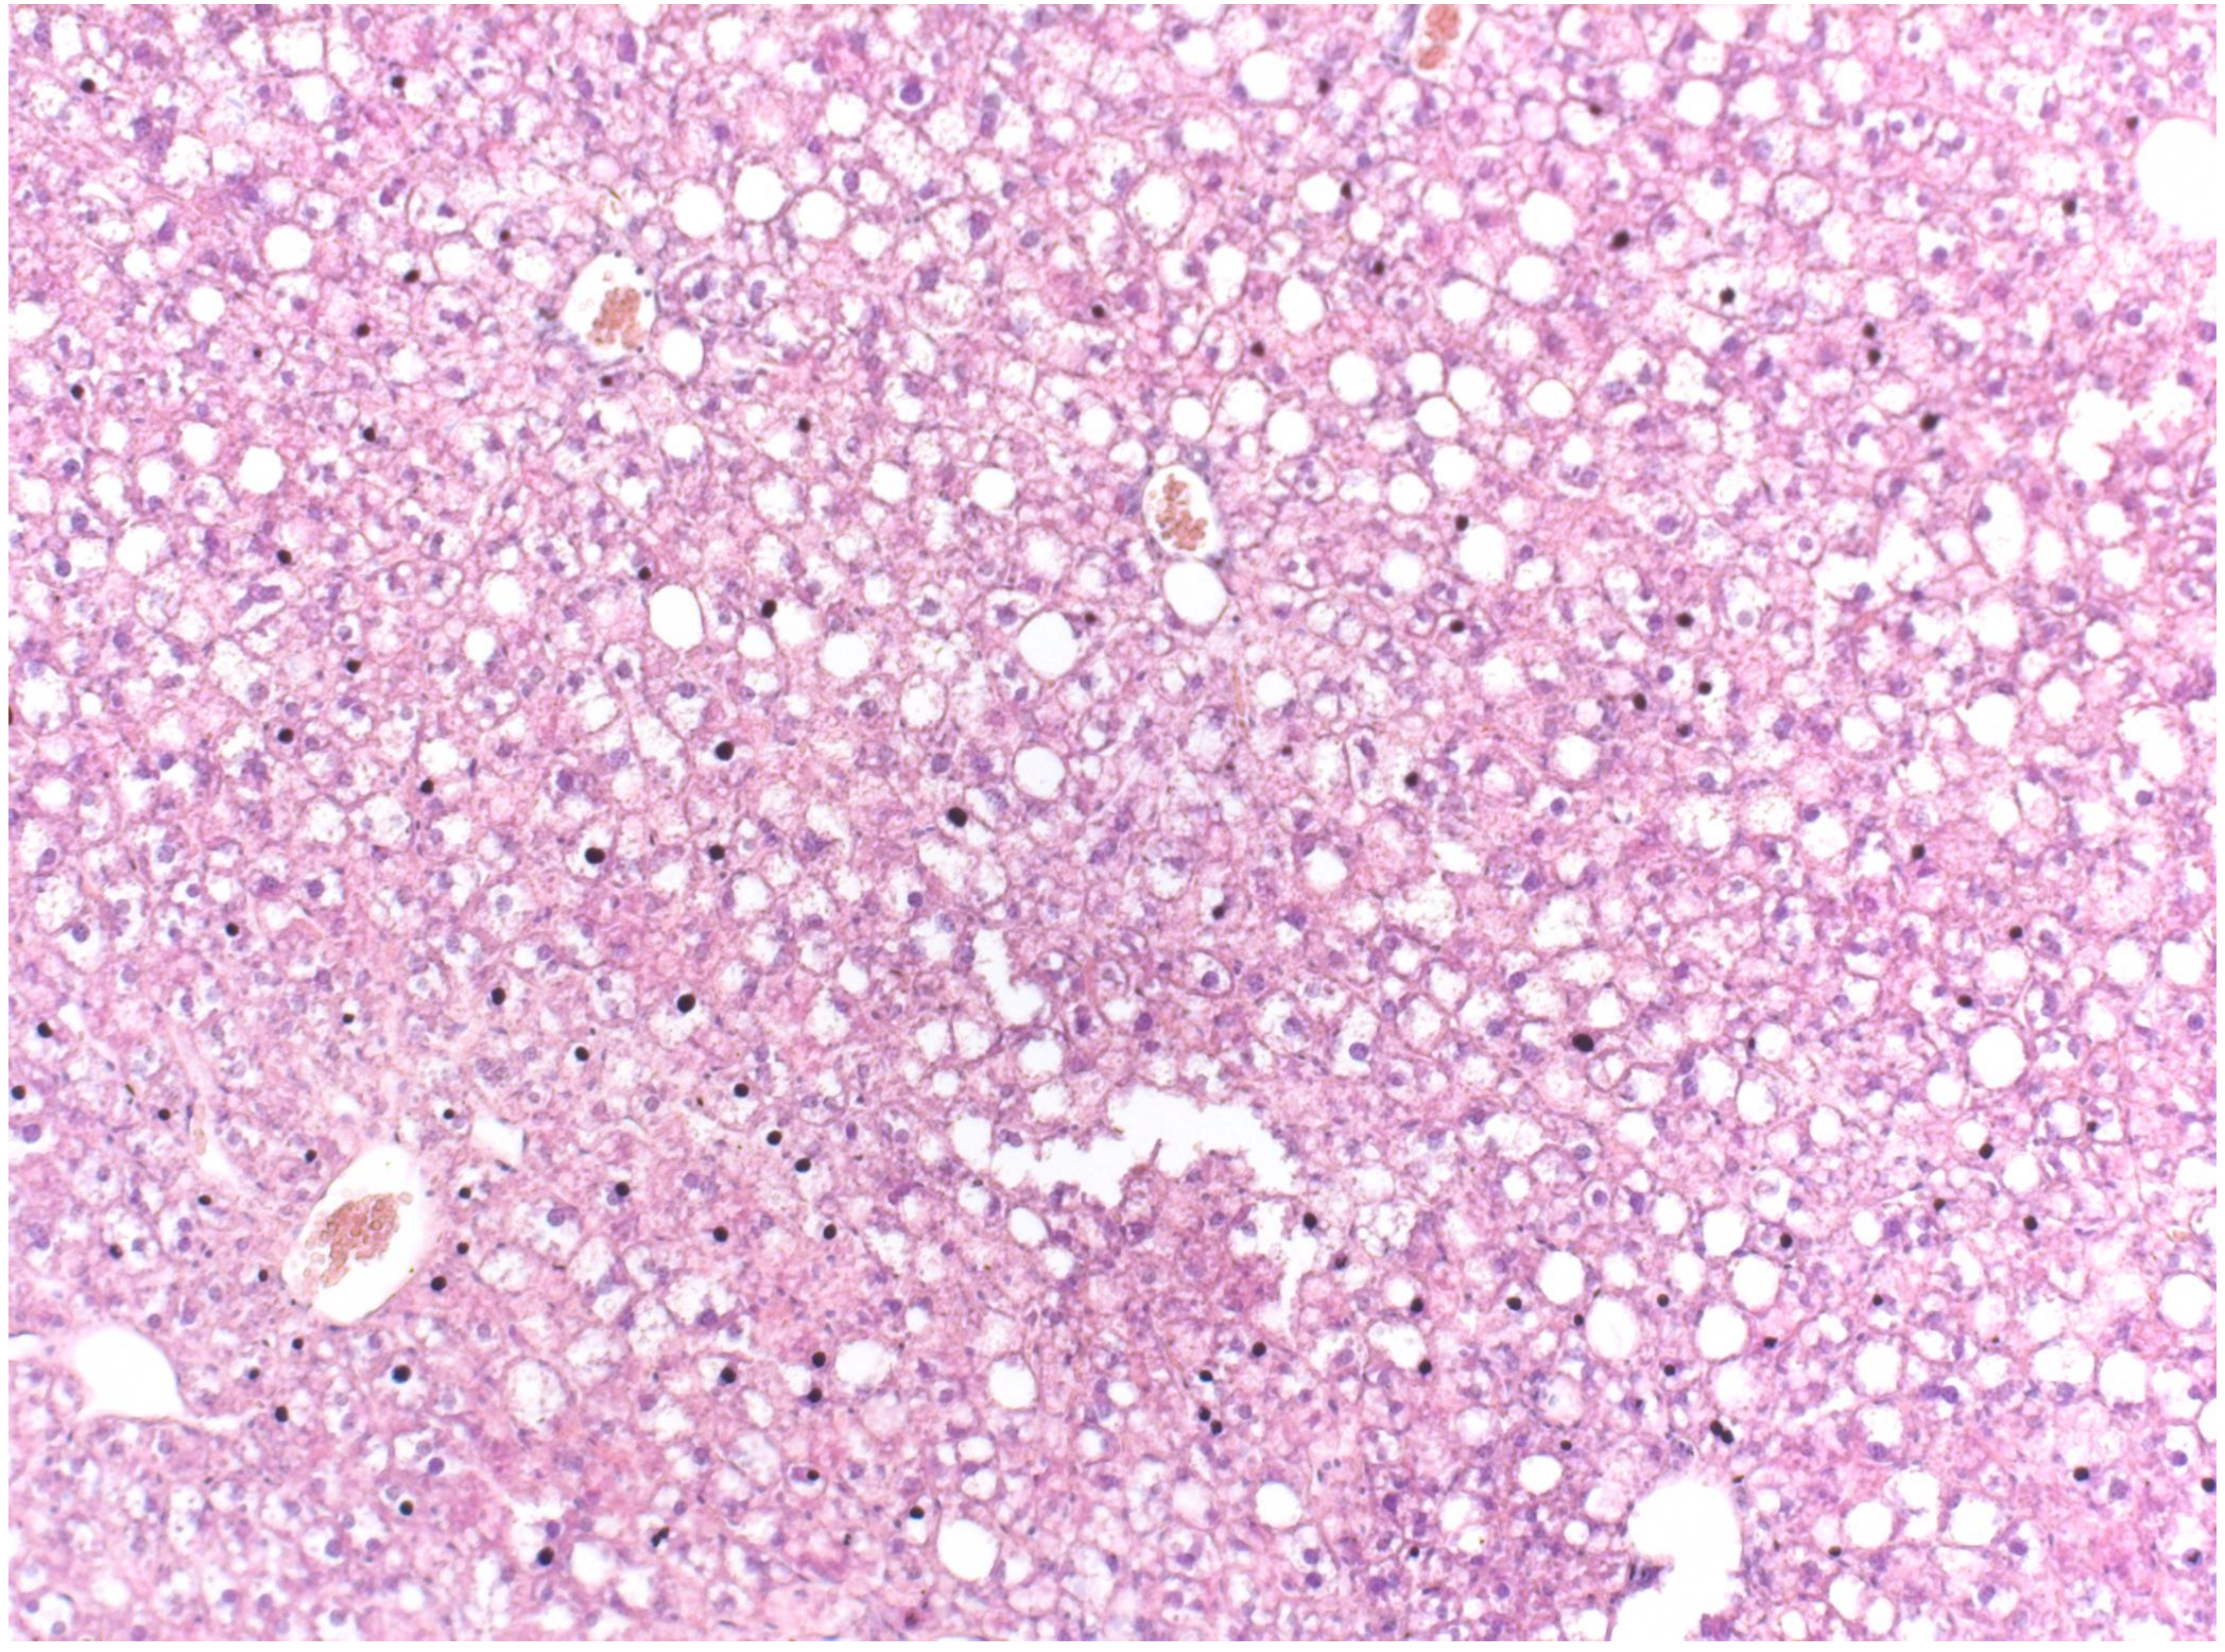

CD11c<sup>-/-</sup>

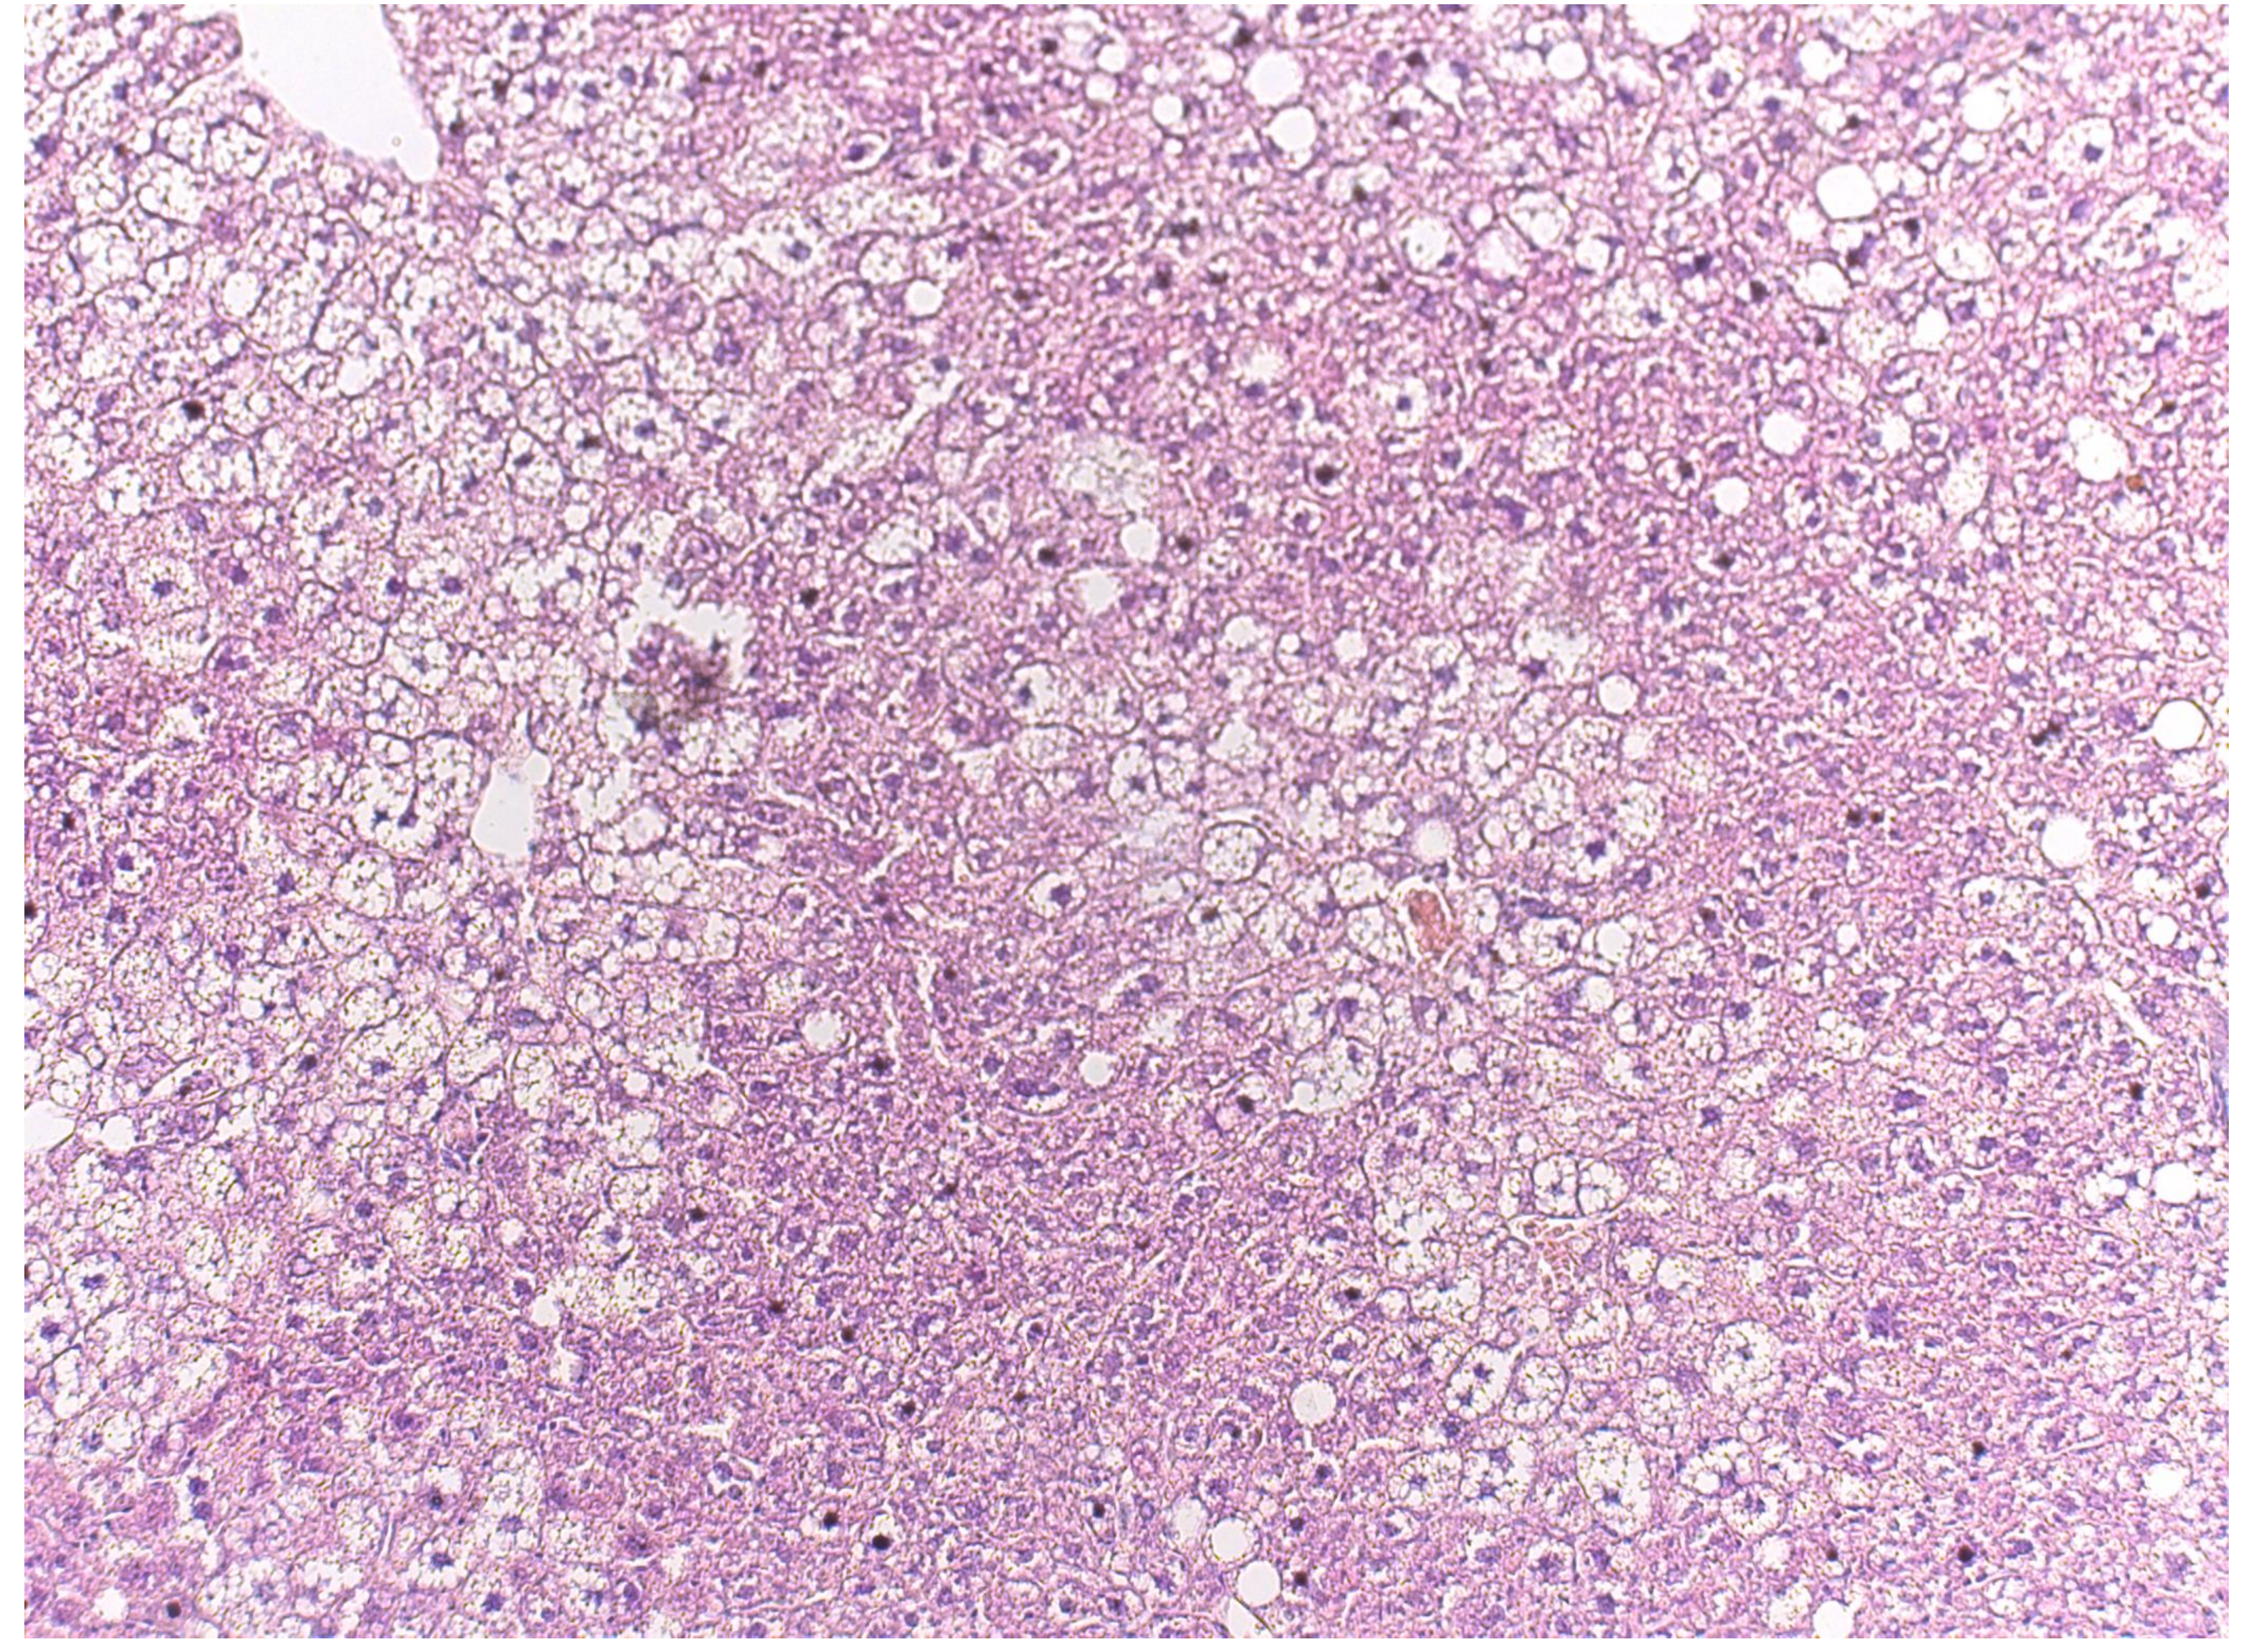

Unprocessed Image Figure 4H  
Pankreas, Insulin, DAPI, Scan, male, obese

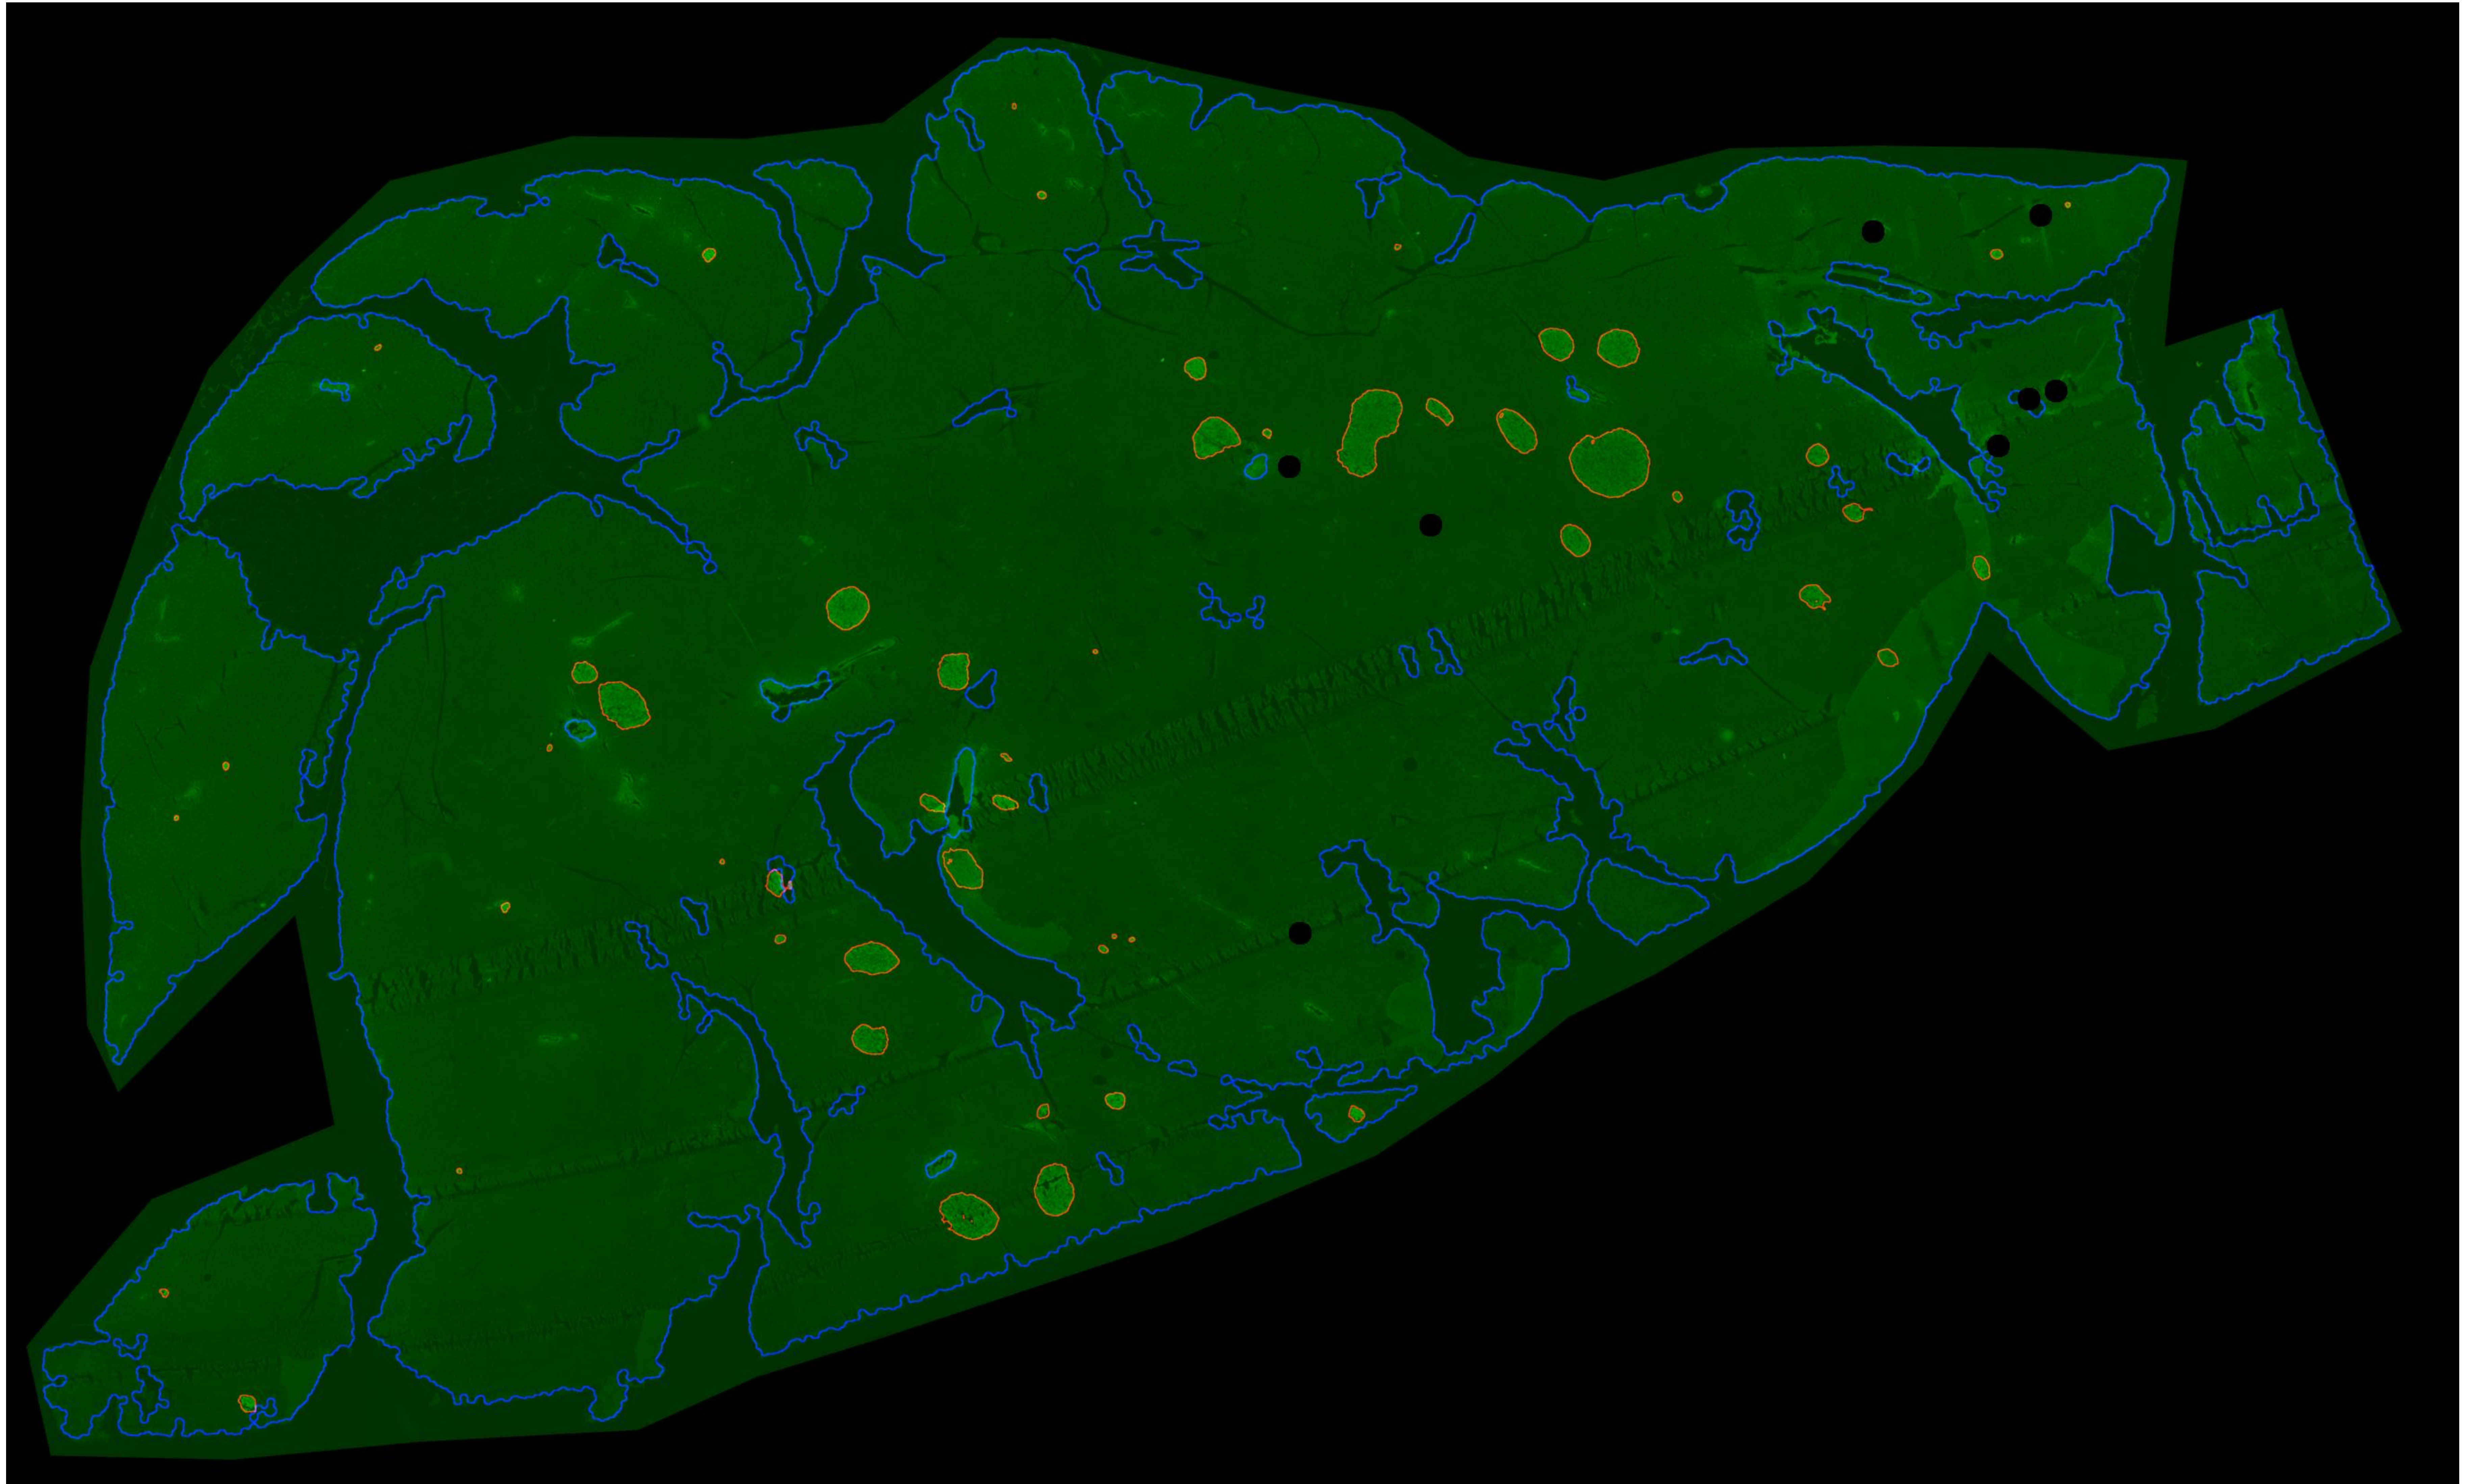

Unprocessed Images Figure 5B (left)

EWAT, male non-obese, MacGreen/LysM-Cre-TdTomato-Chimera, 10x

Merge

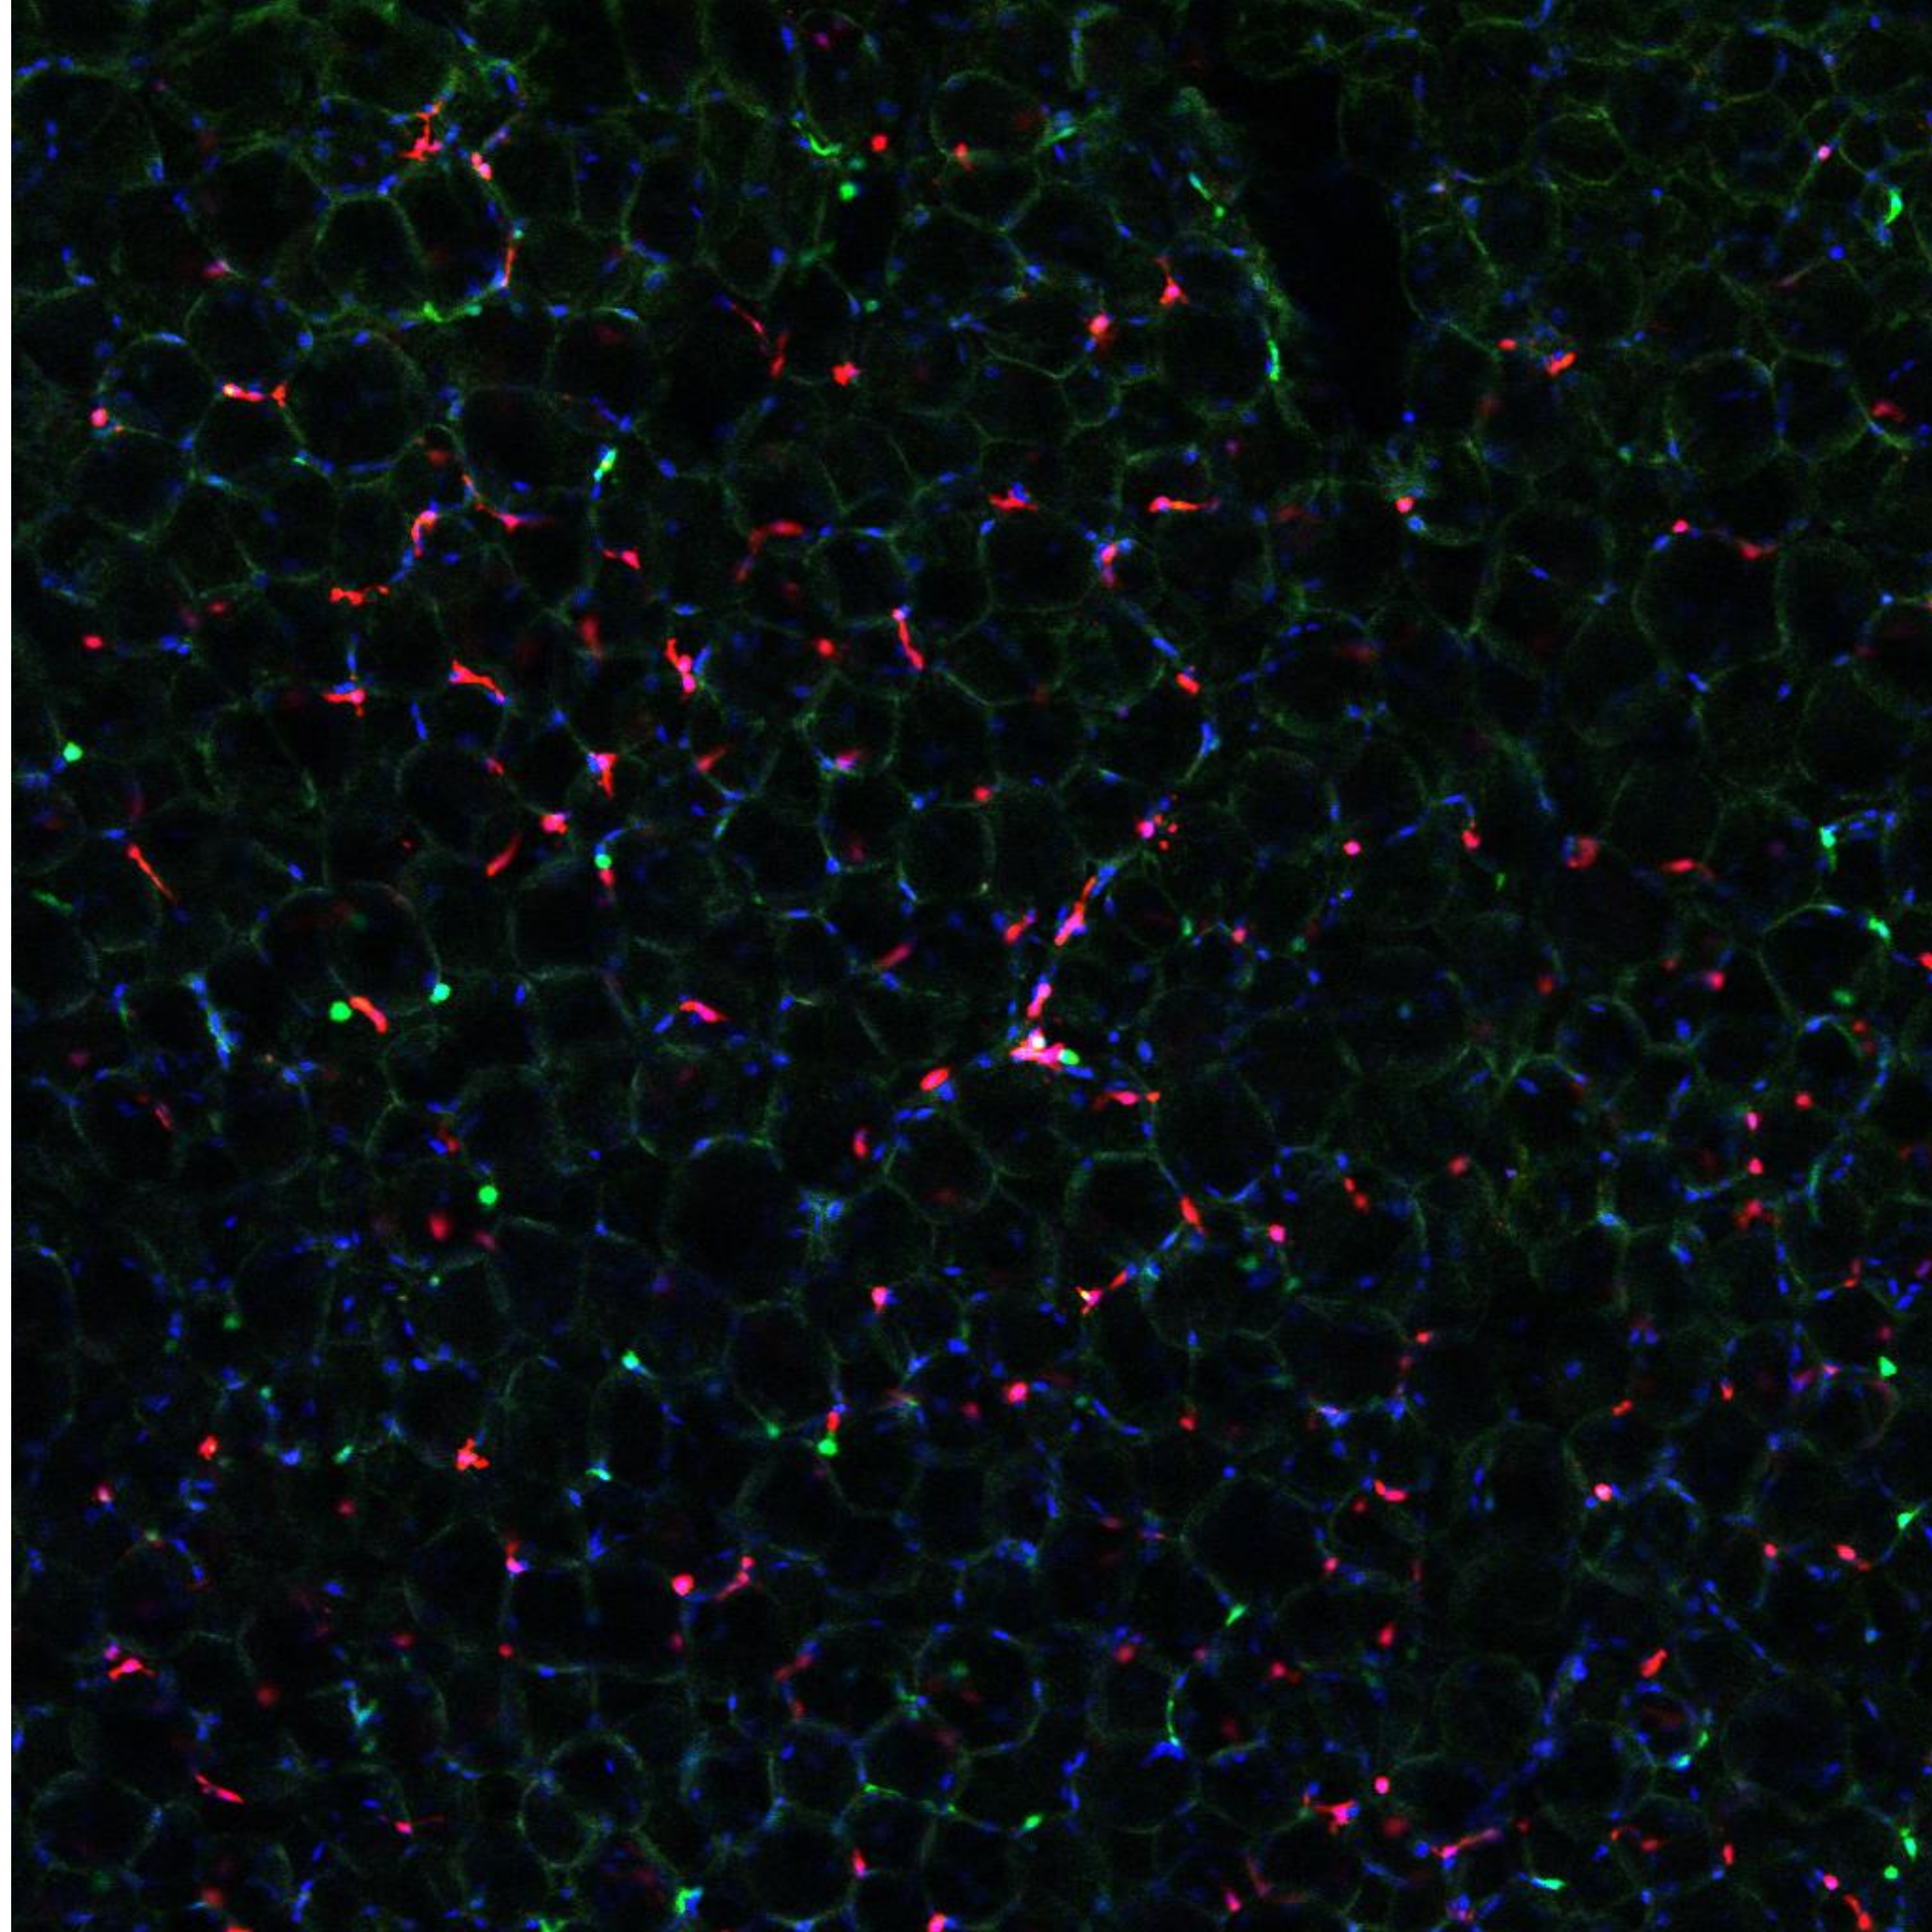

DAPI

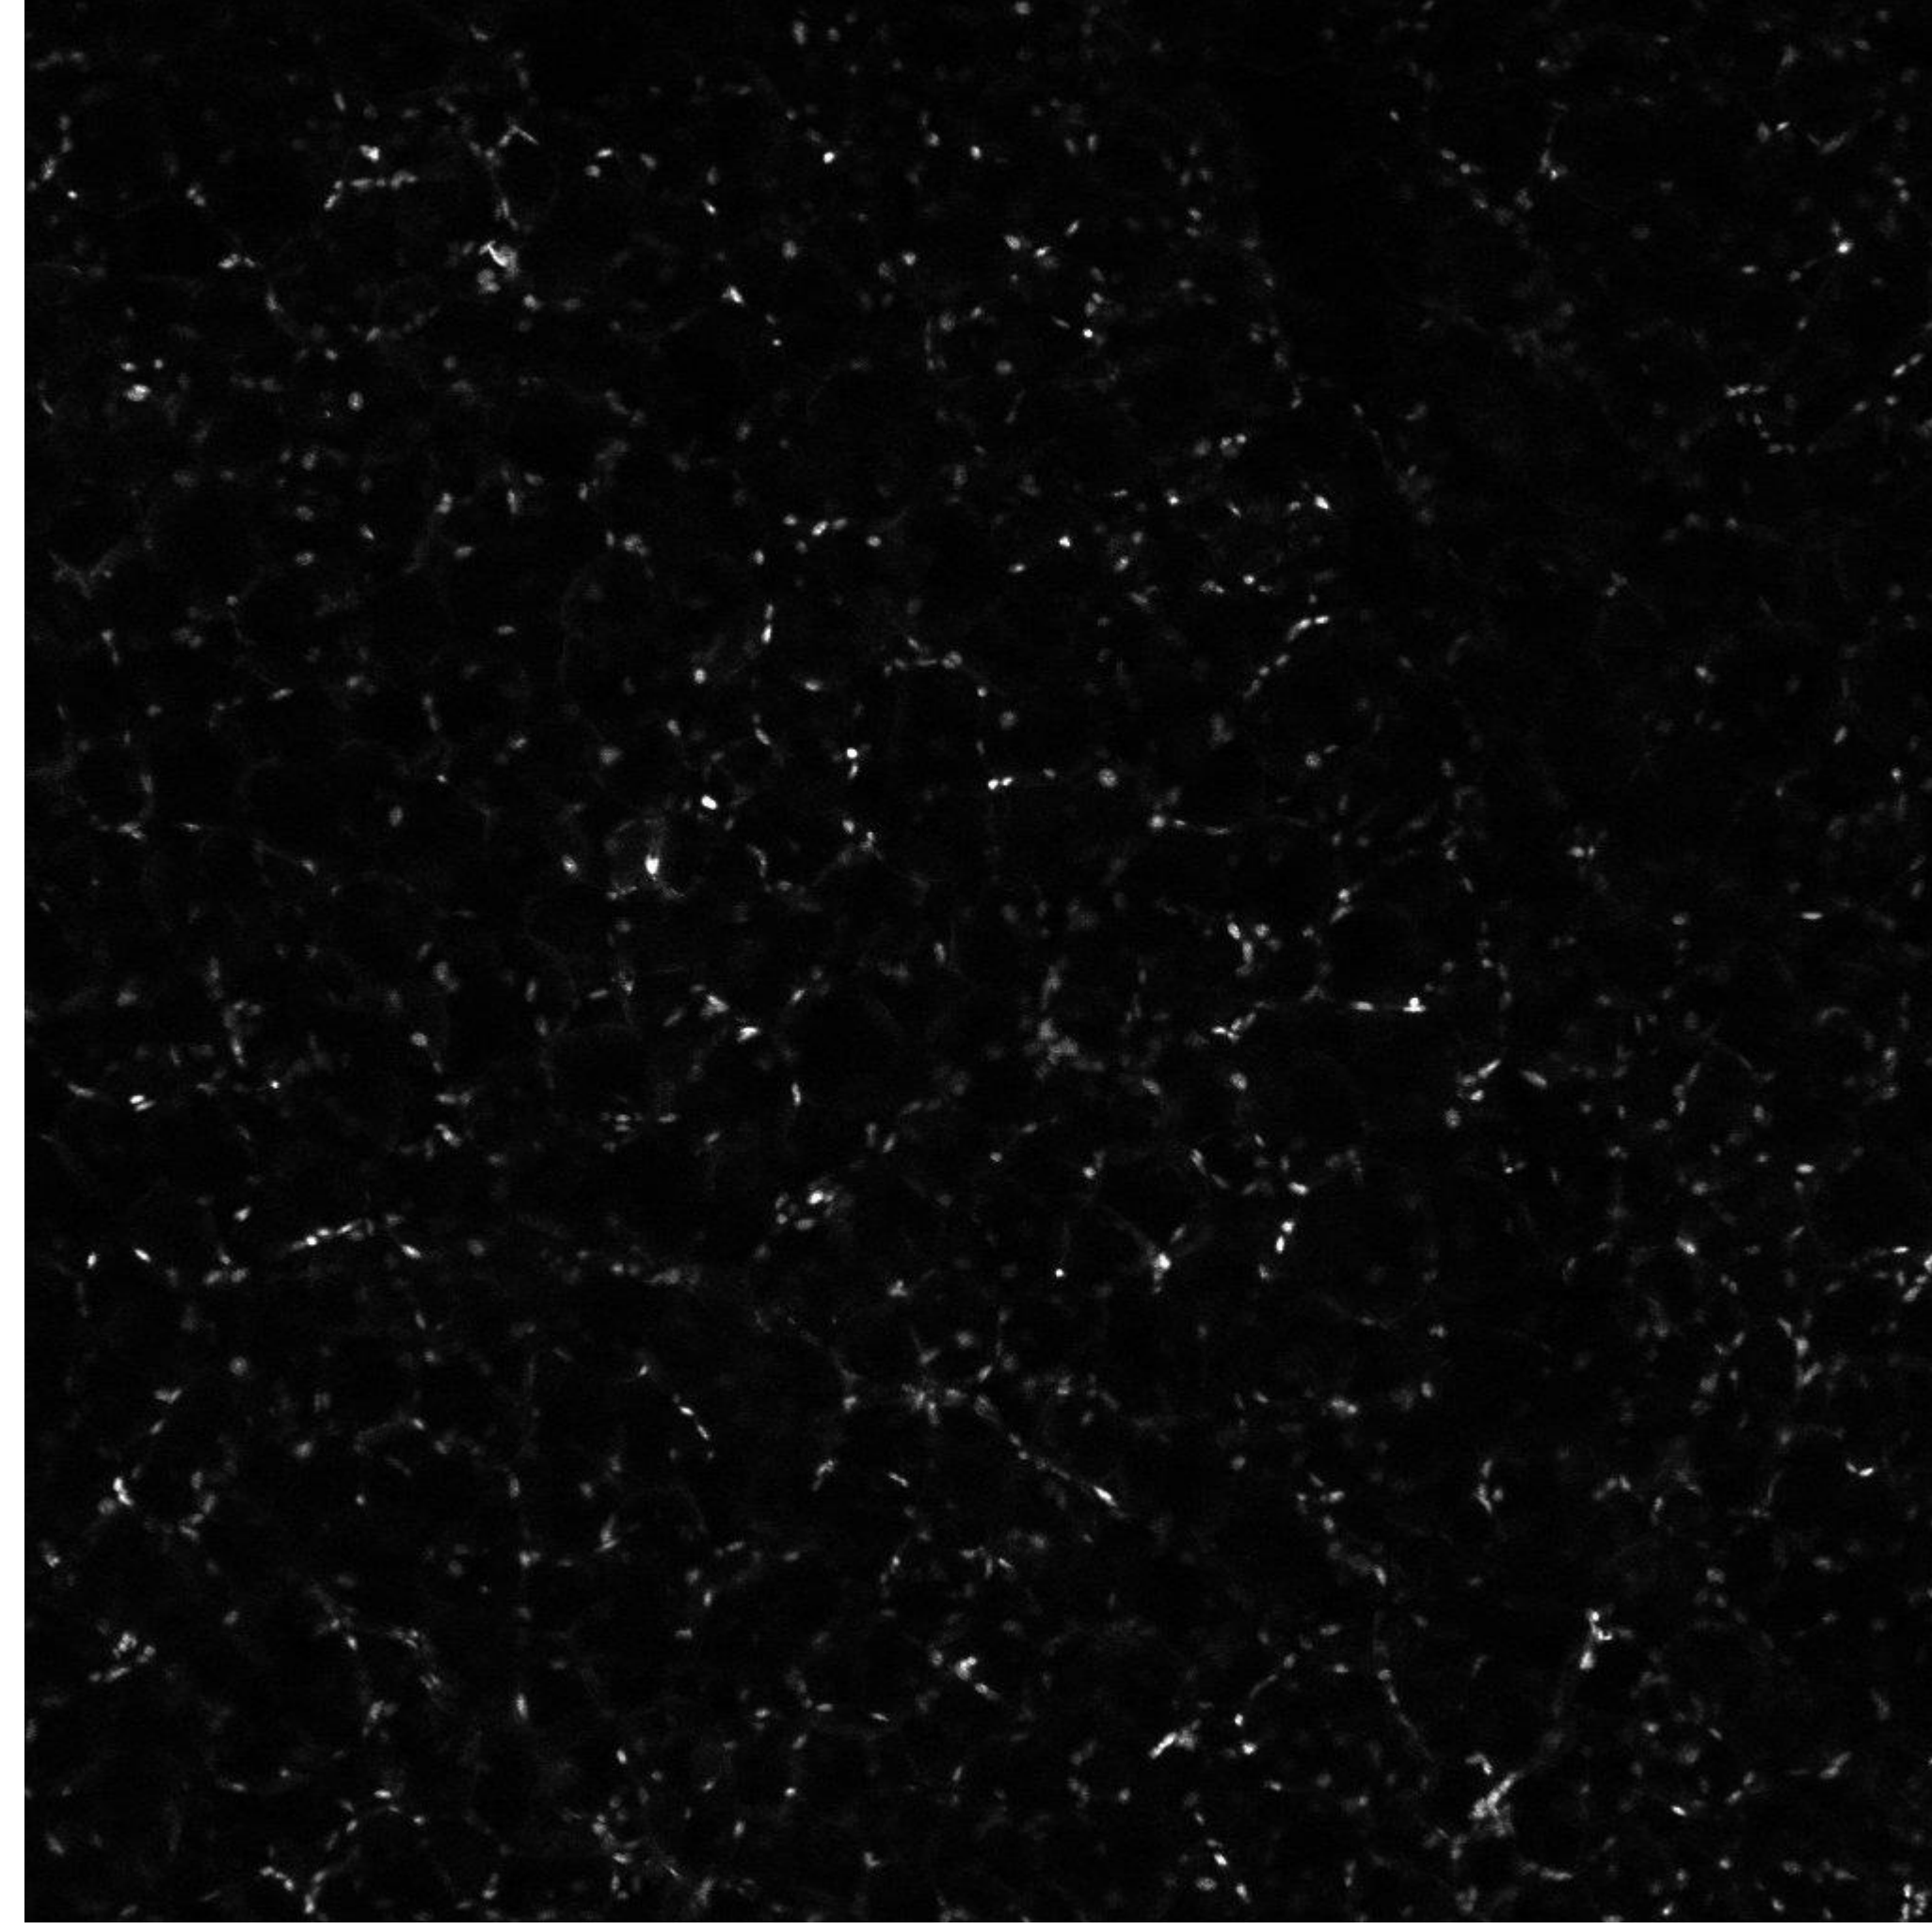

GFP

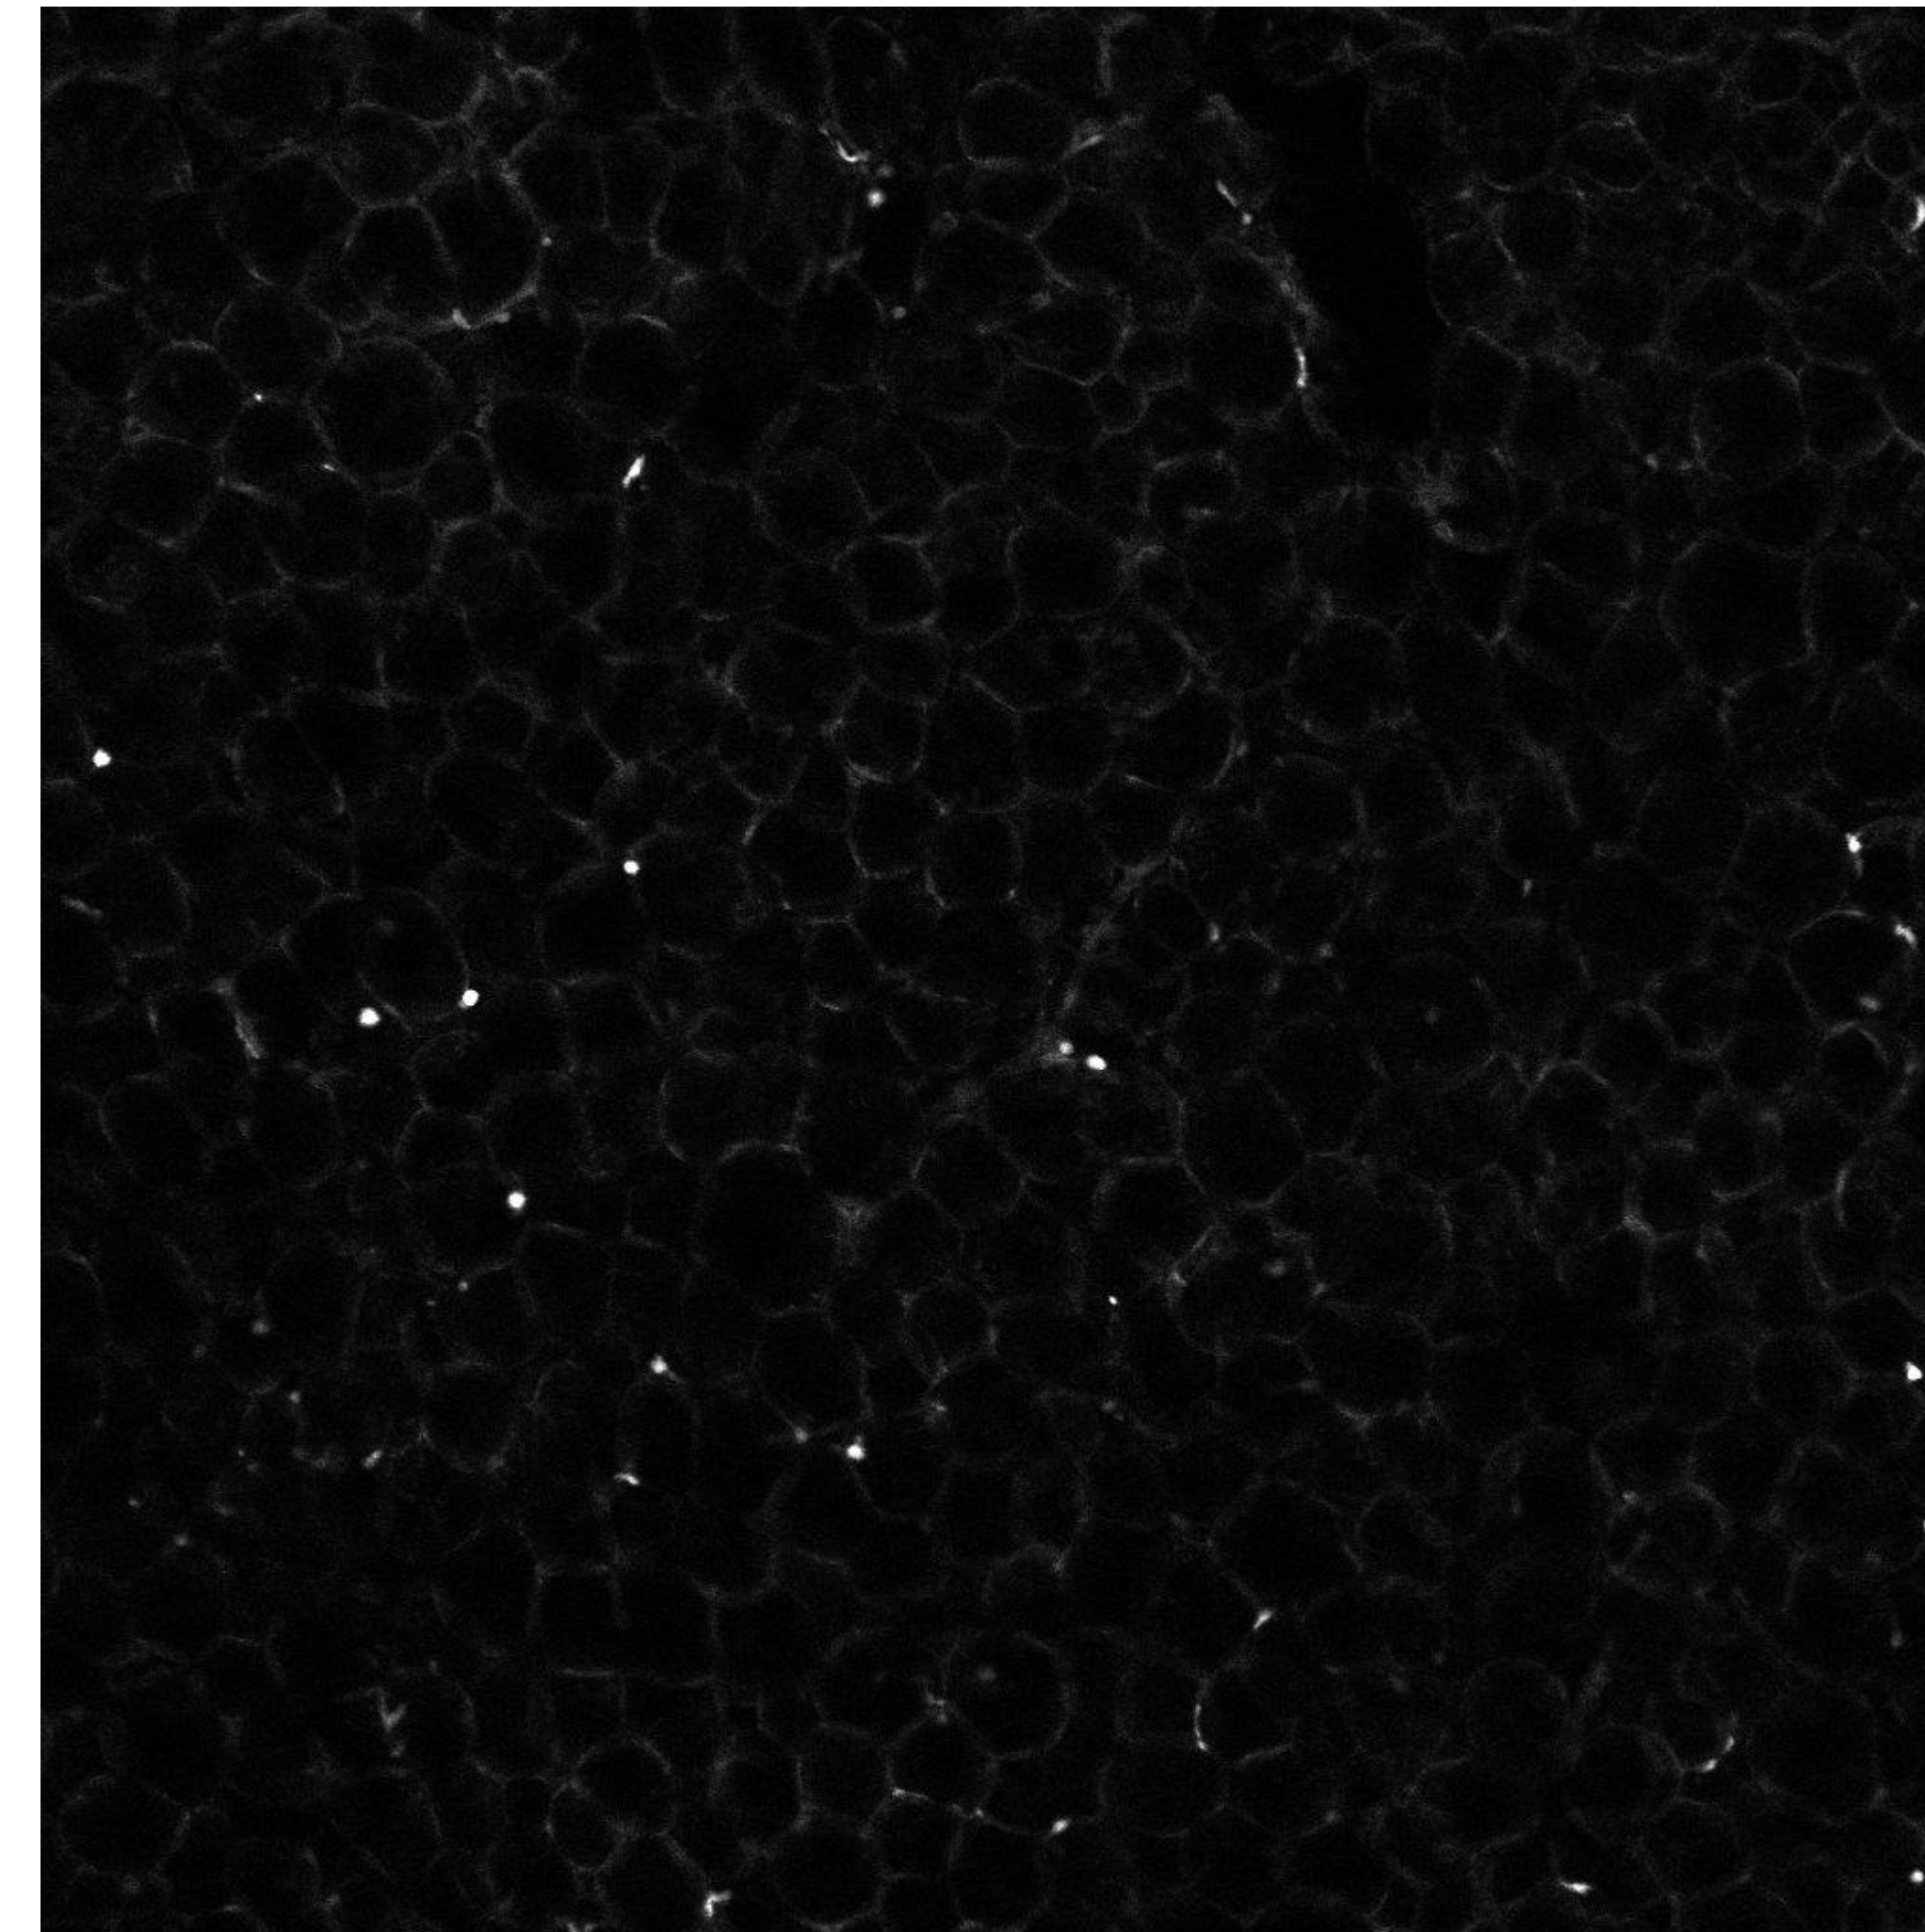

TdTomato/RFP

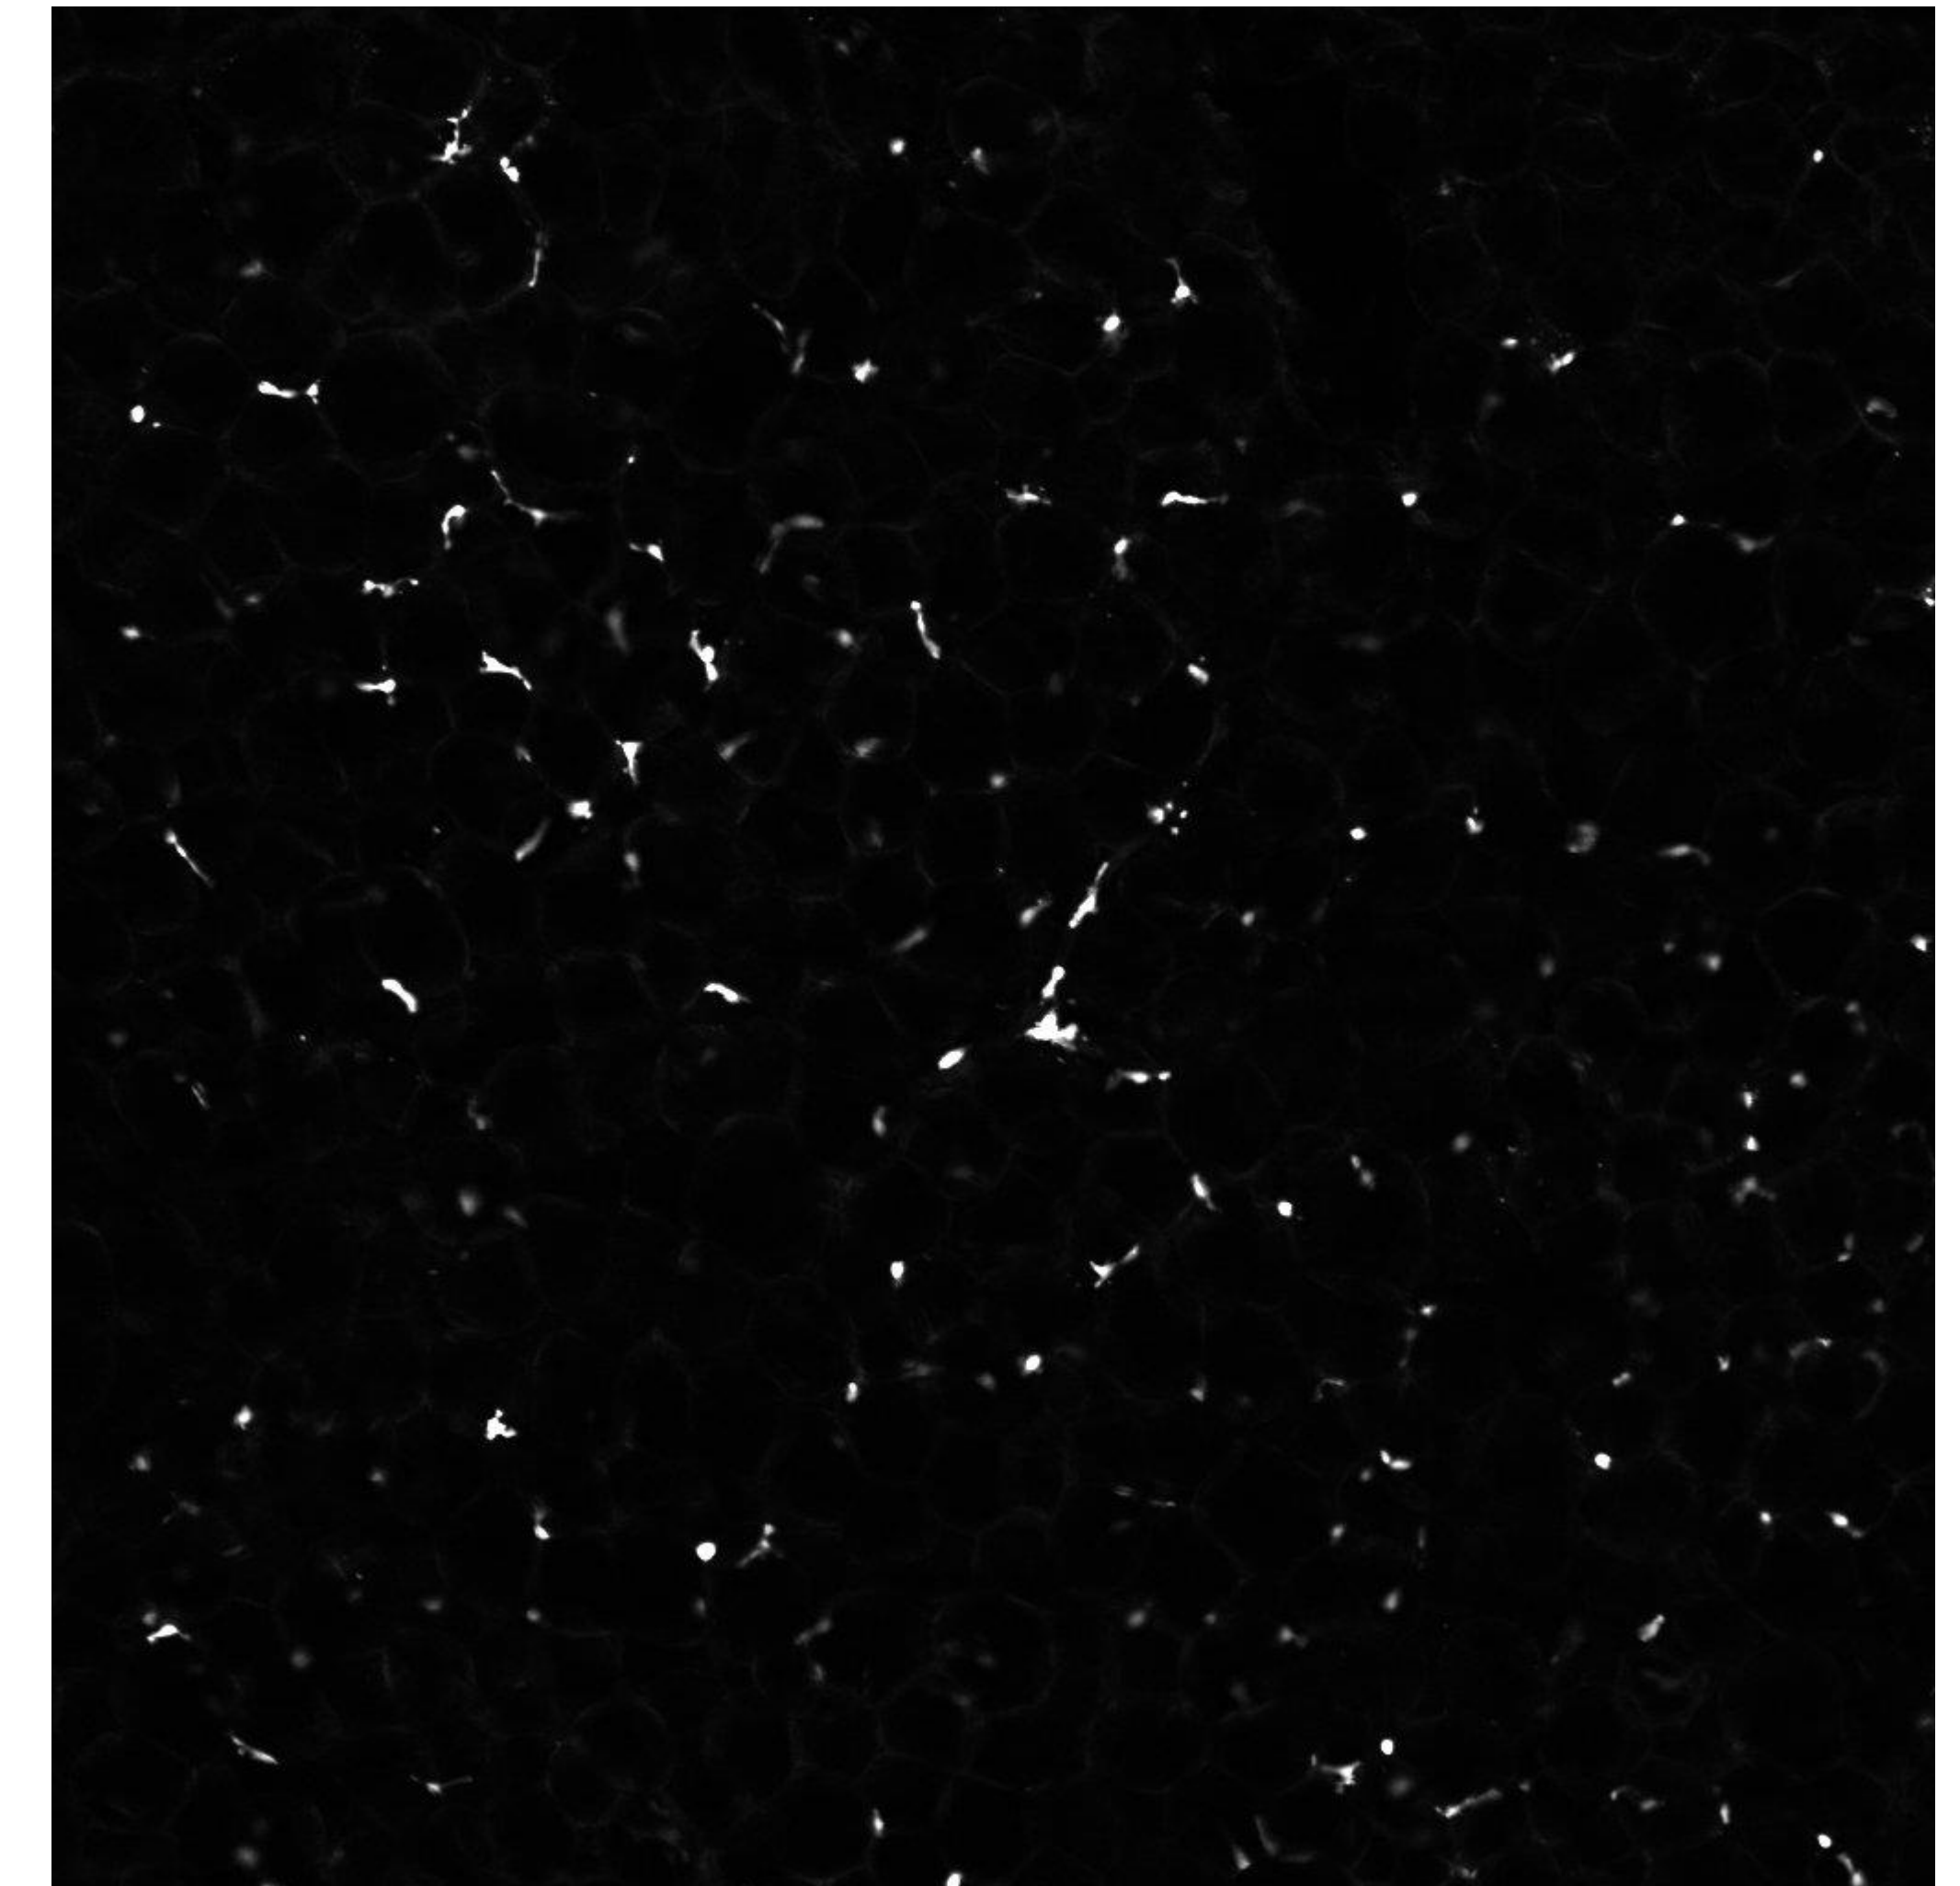

Unprocessed Images Figure 5B (right)

EWAT, male obese, MacGreen/LysM-Cre-TdTomato-Chimera, 10x

Merge

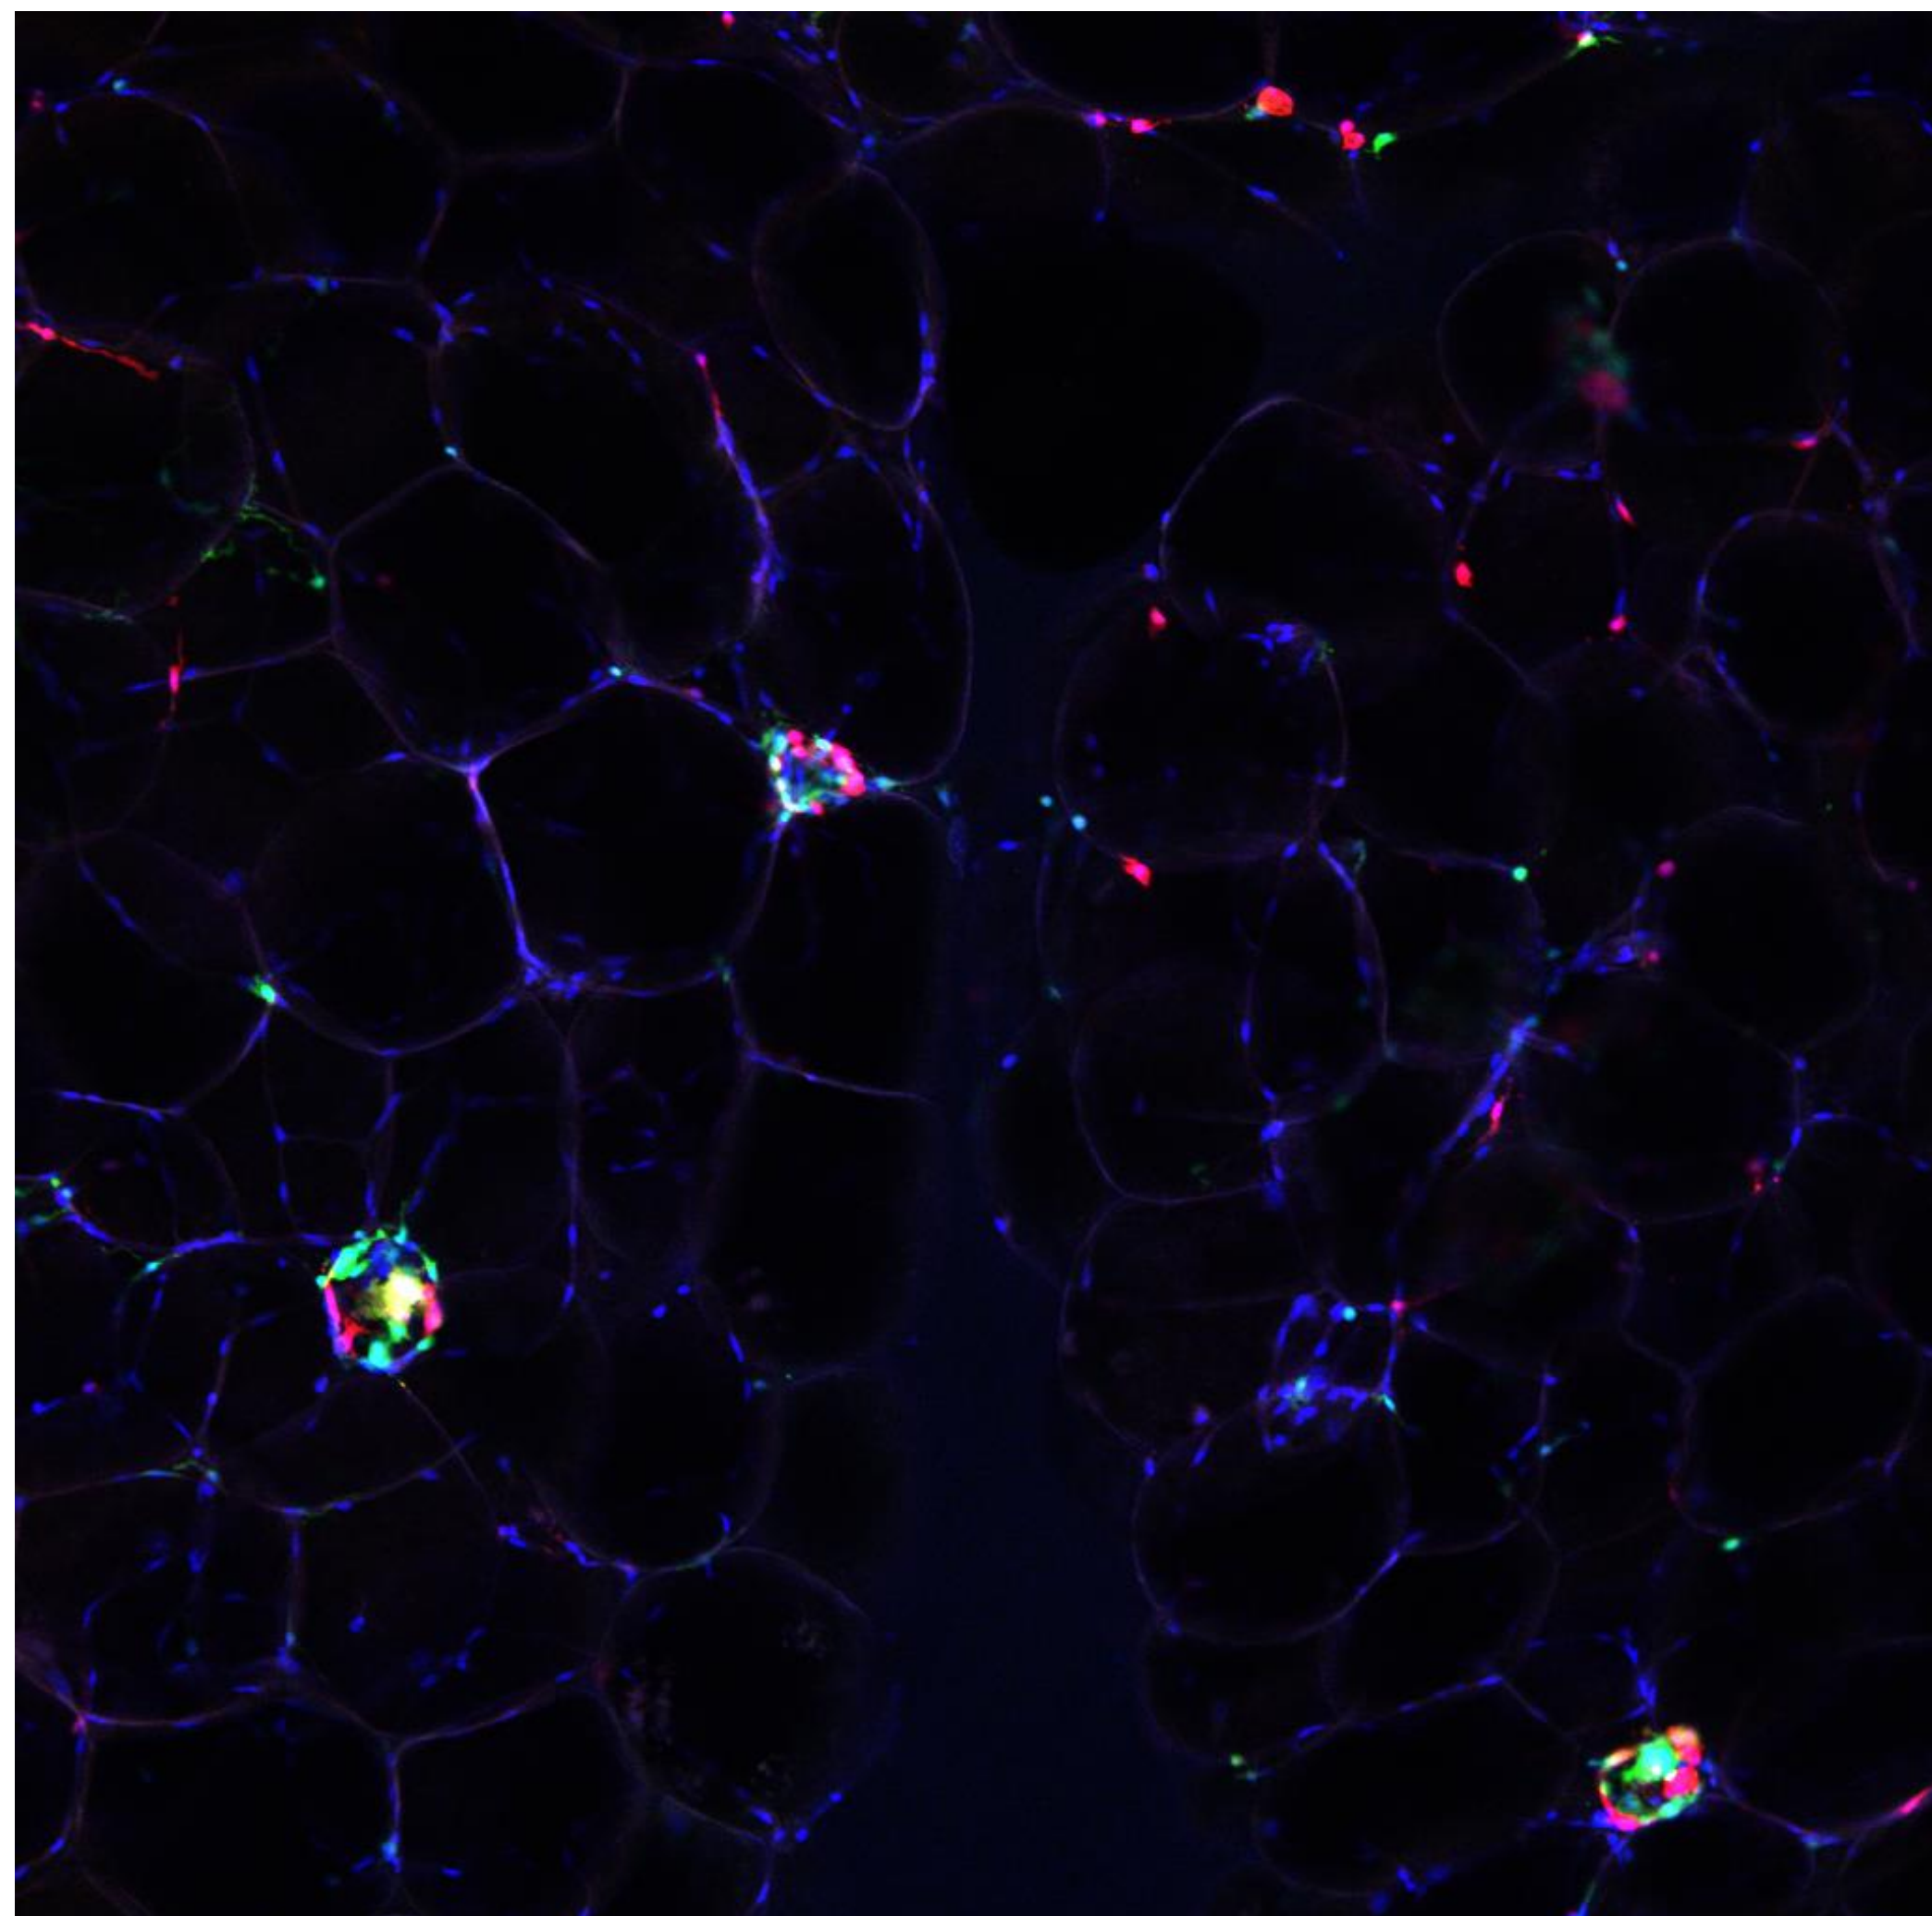

DAPI

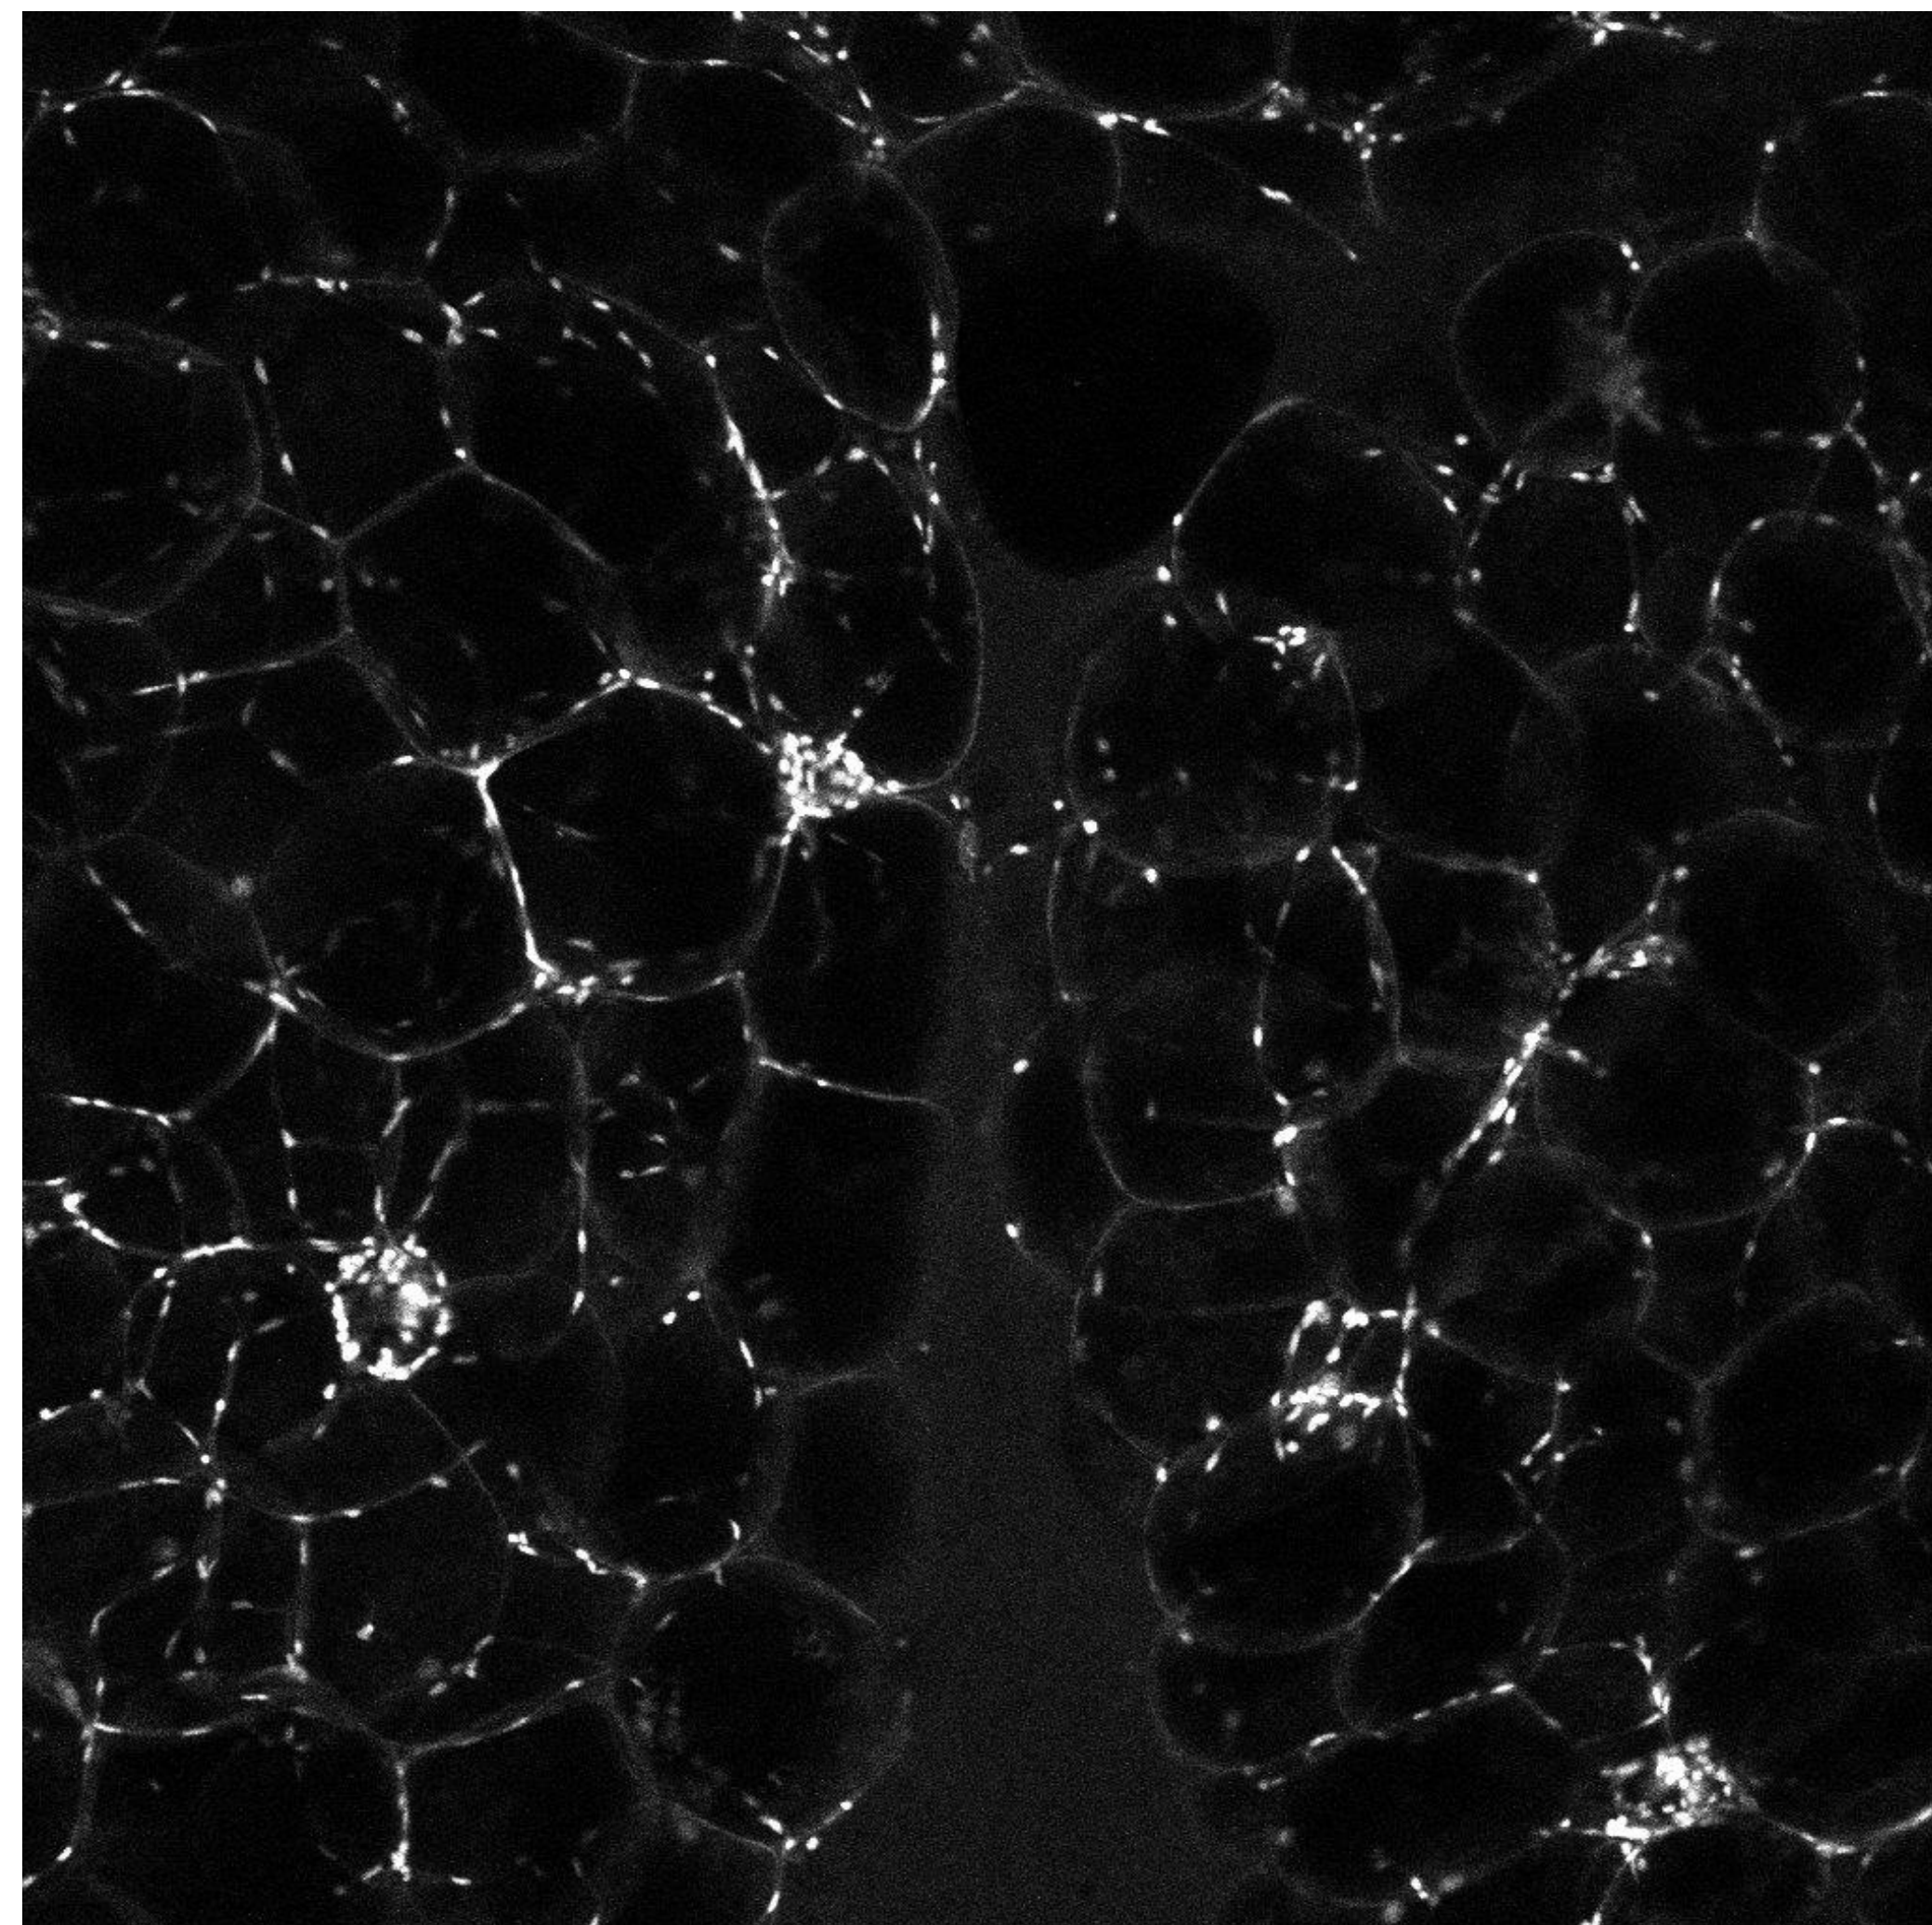

GFP

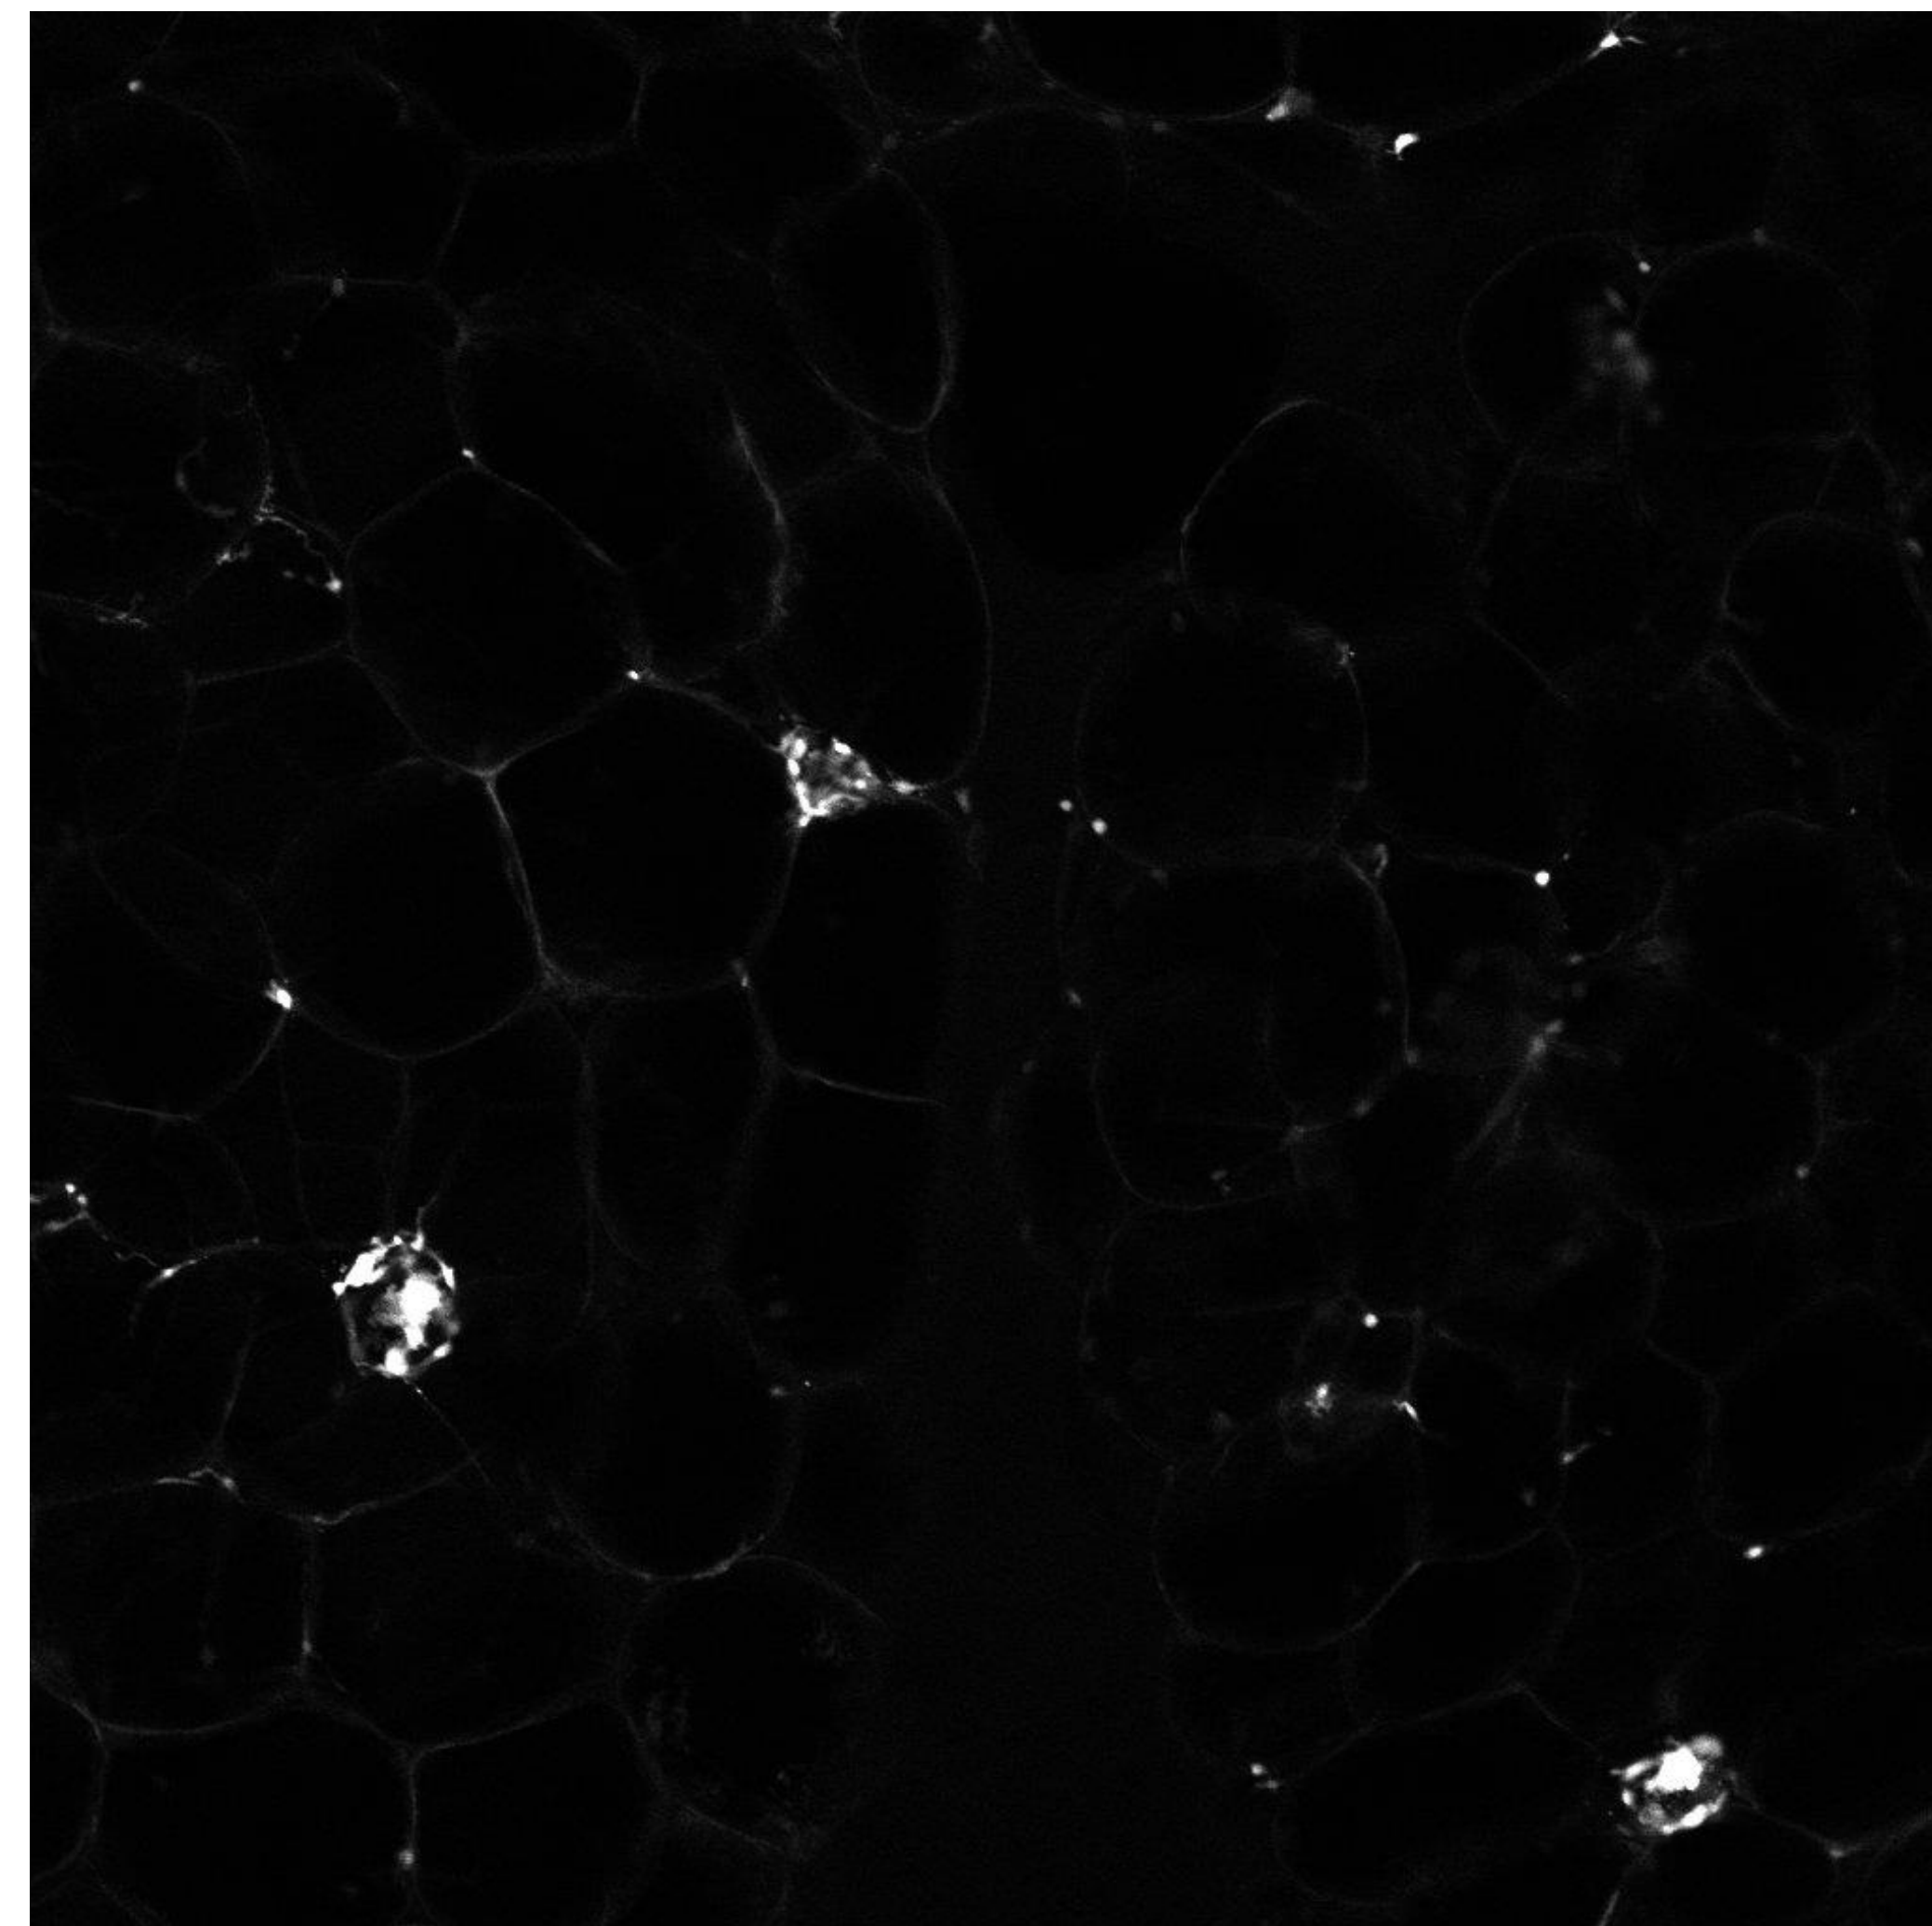

TdTomato/RFP

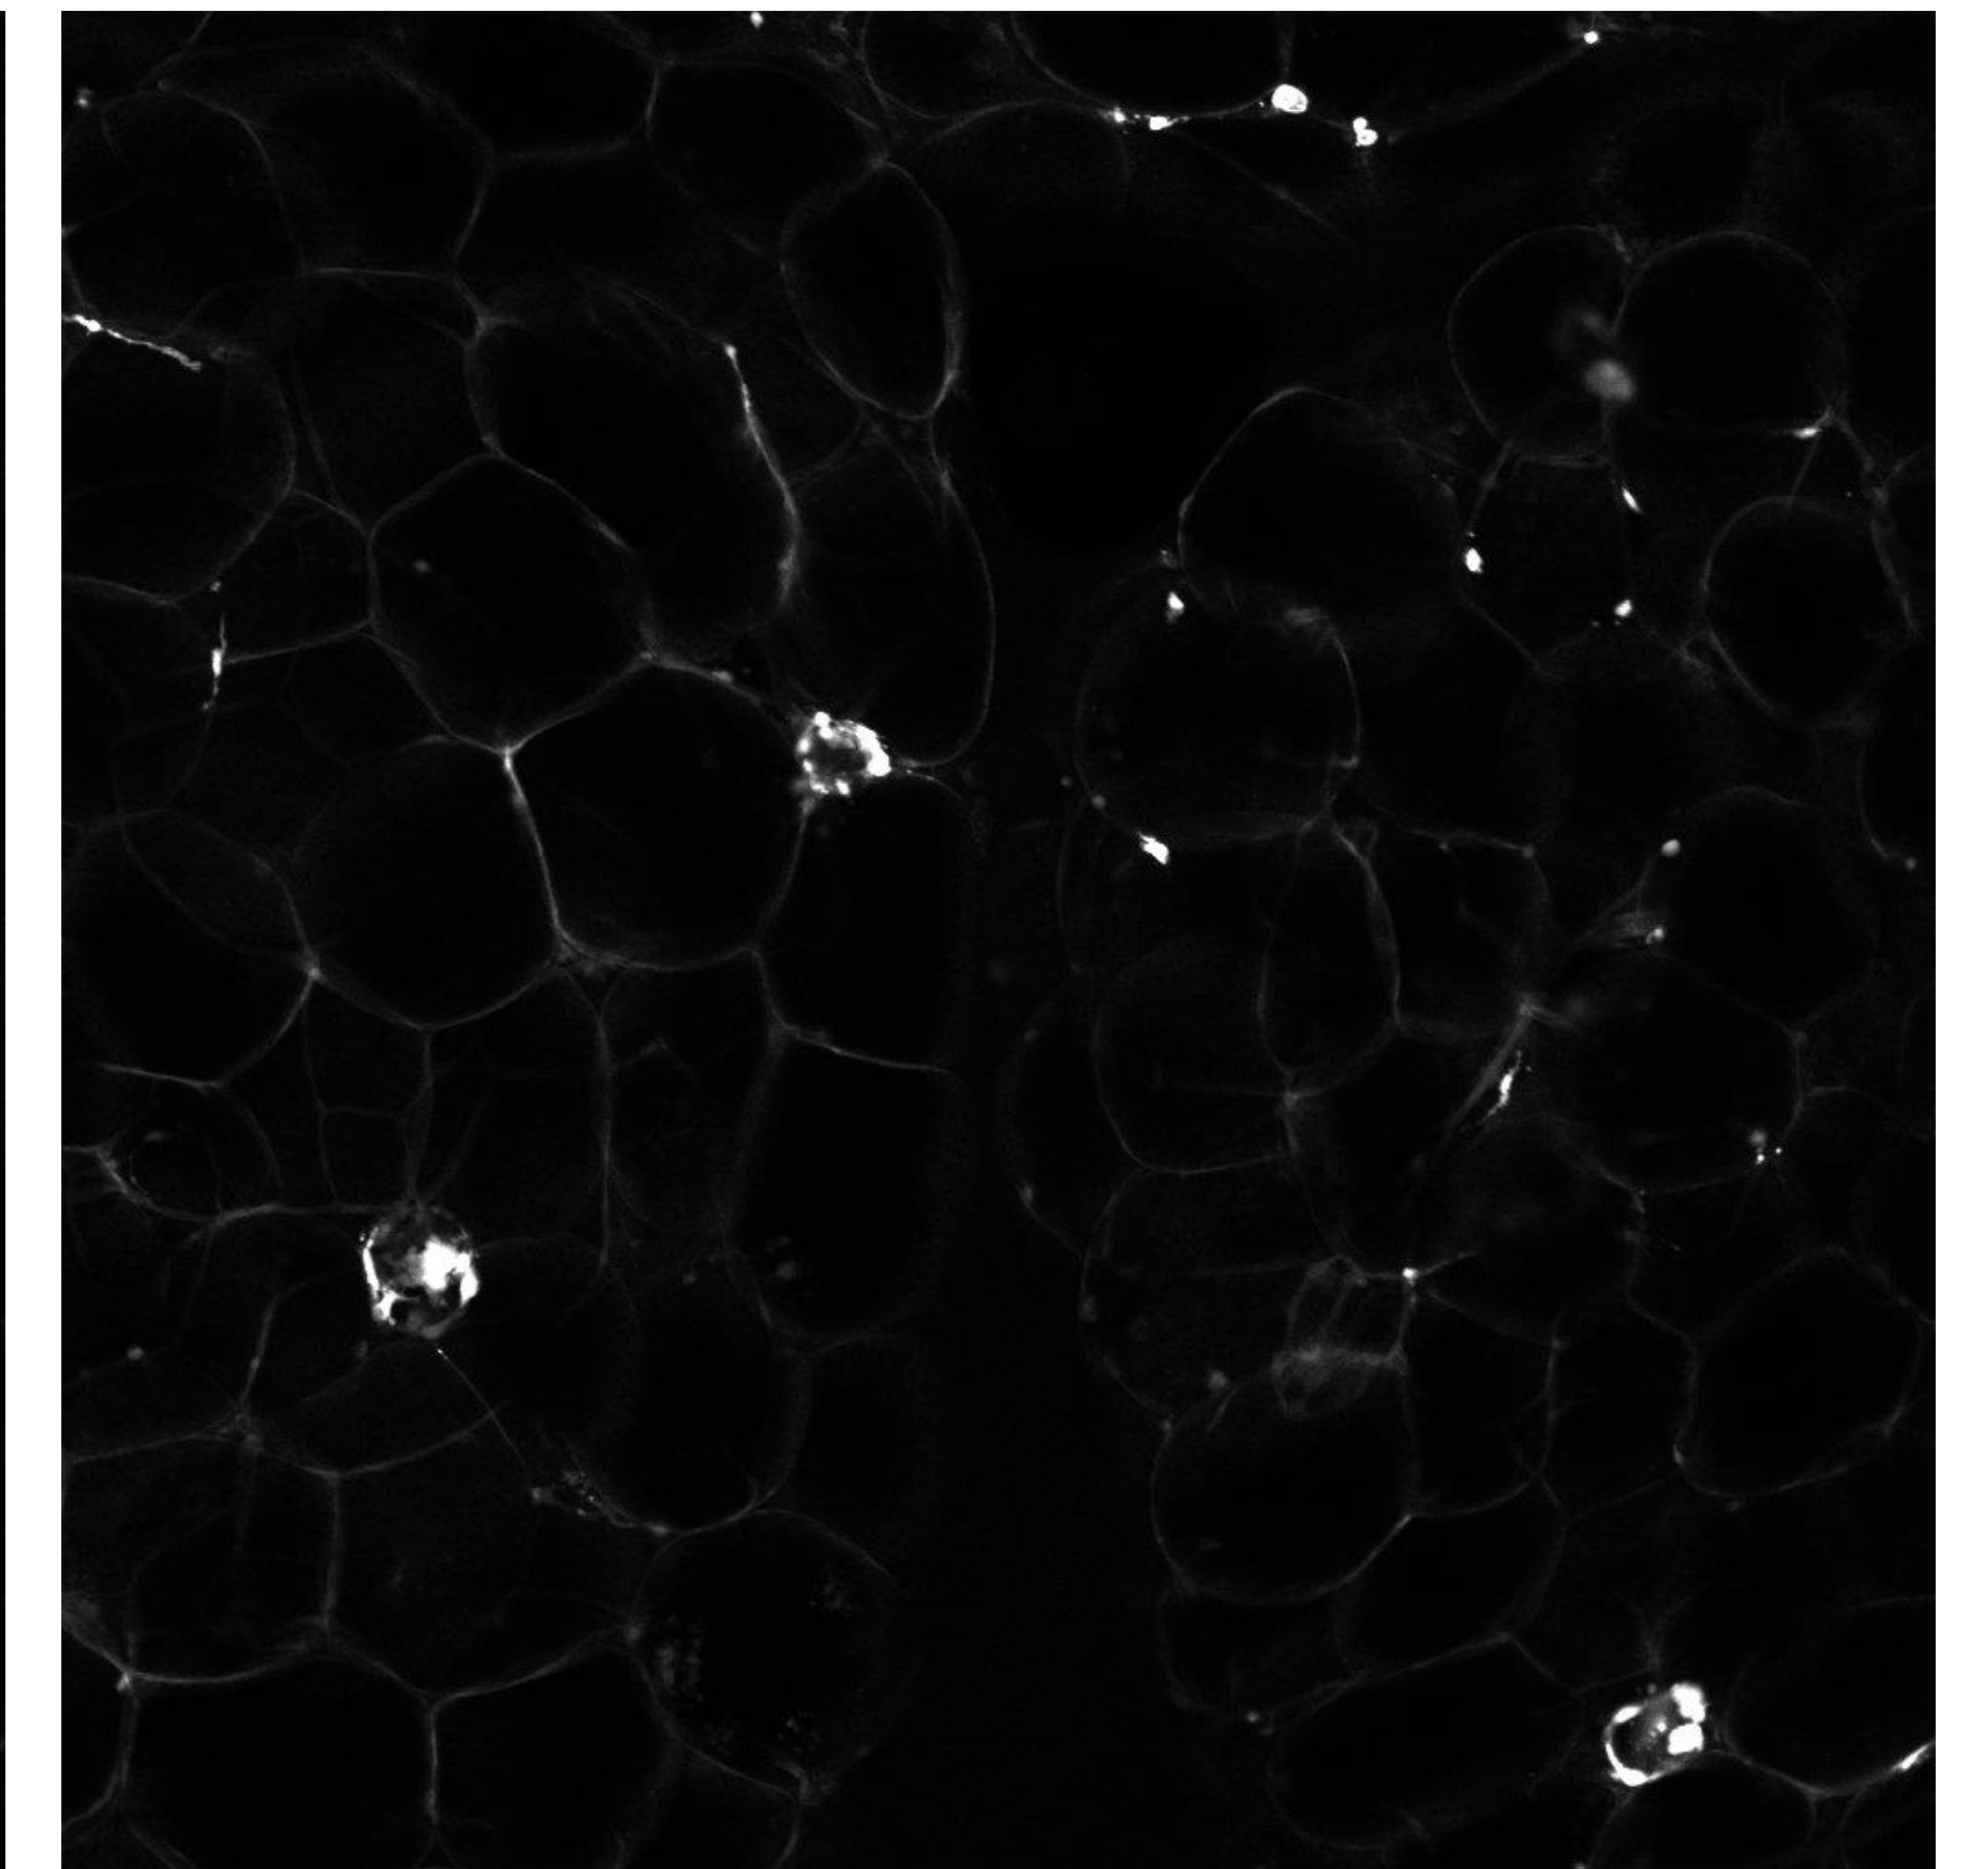

Unprocessed Images Figure 5C

EWAT, male obese, MacGreen/LysM-Cre-TdTomato-Chimera, 10x

Merge

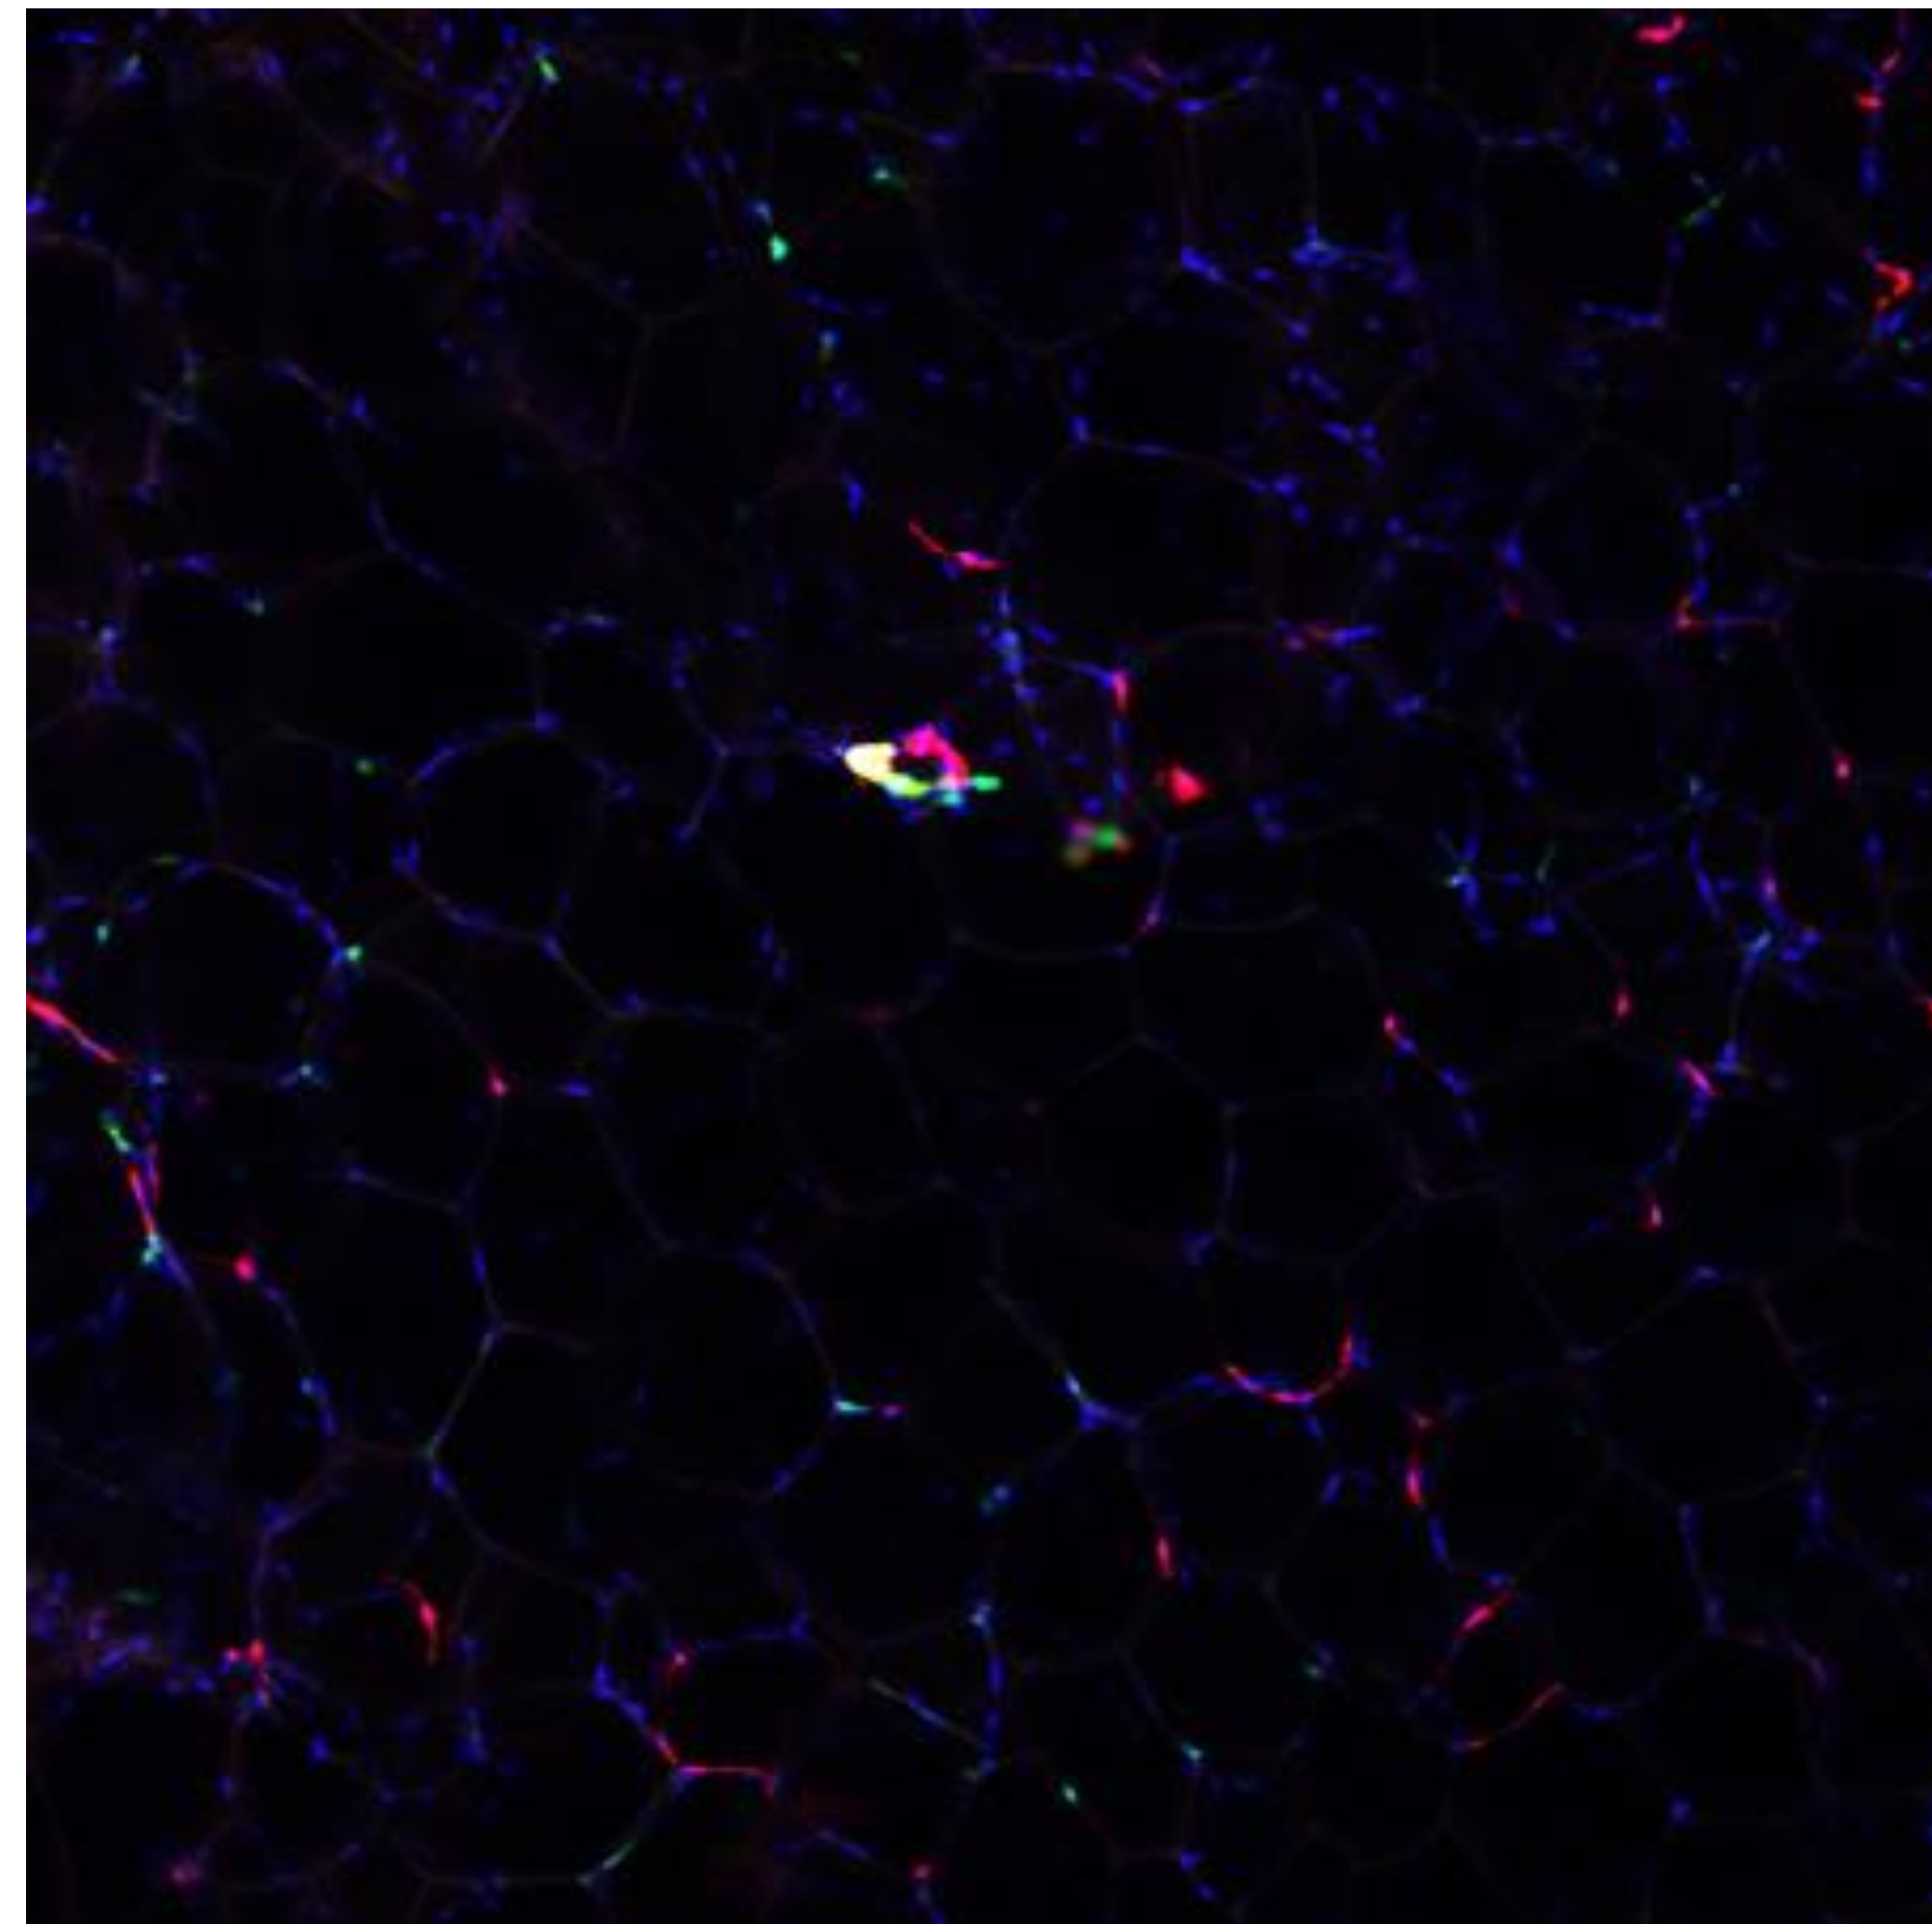

DAPI

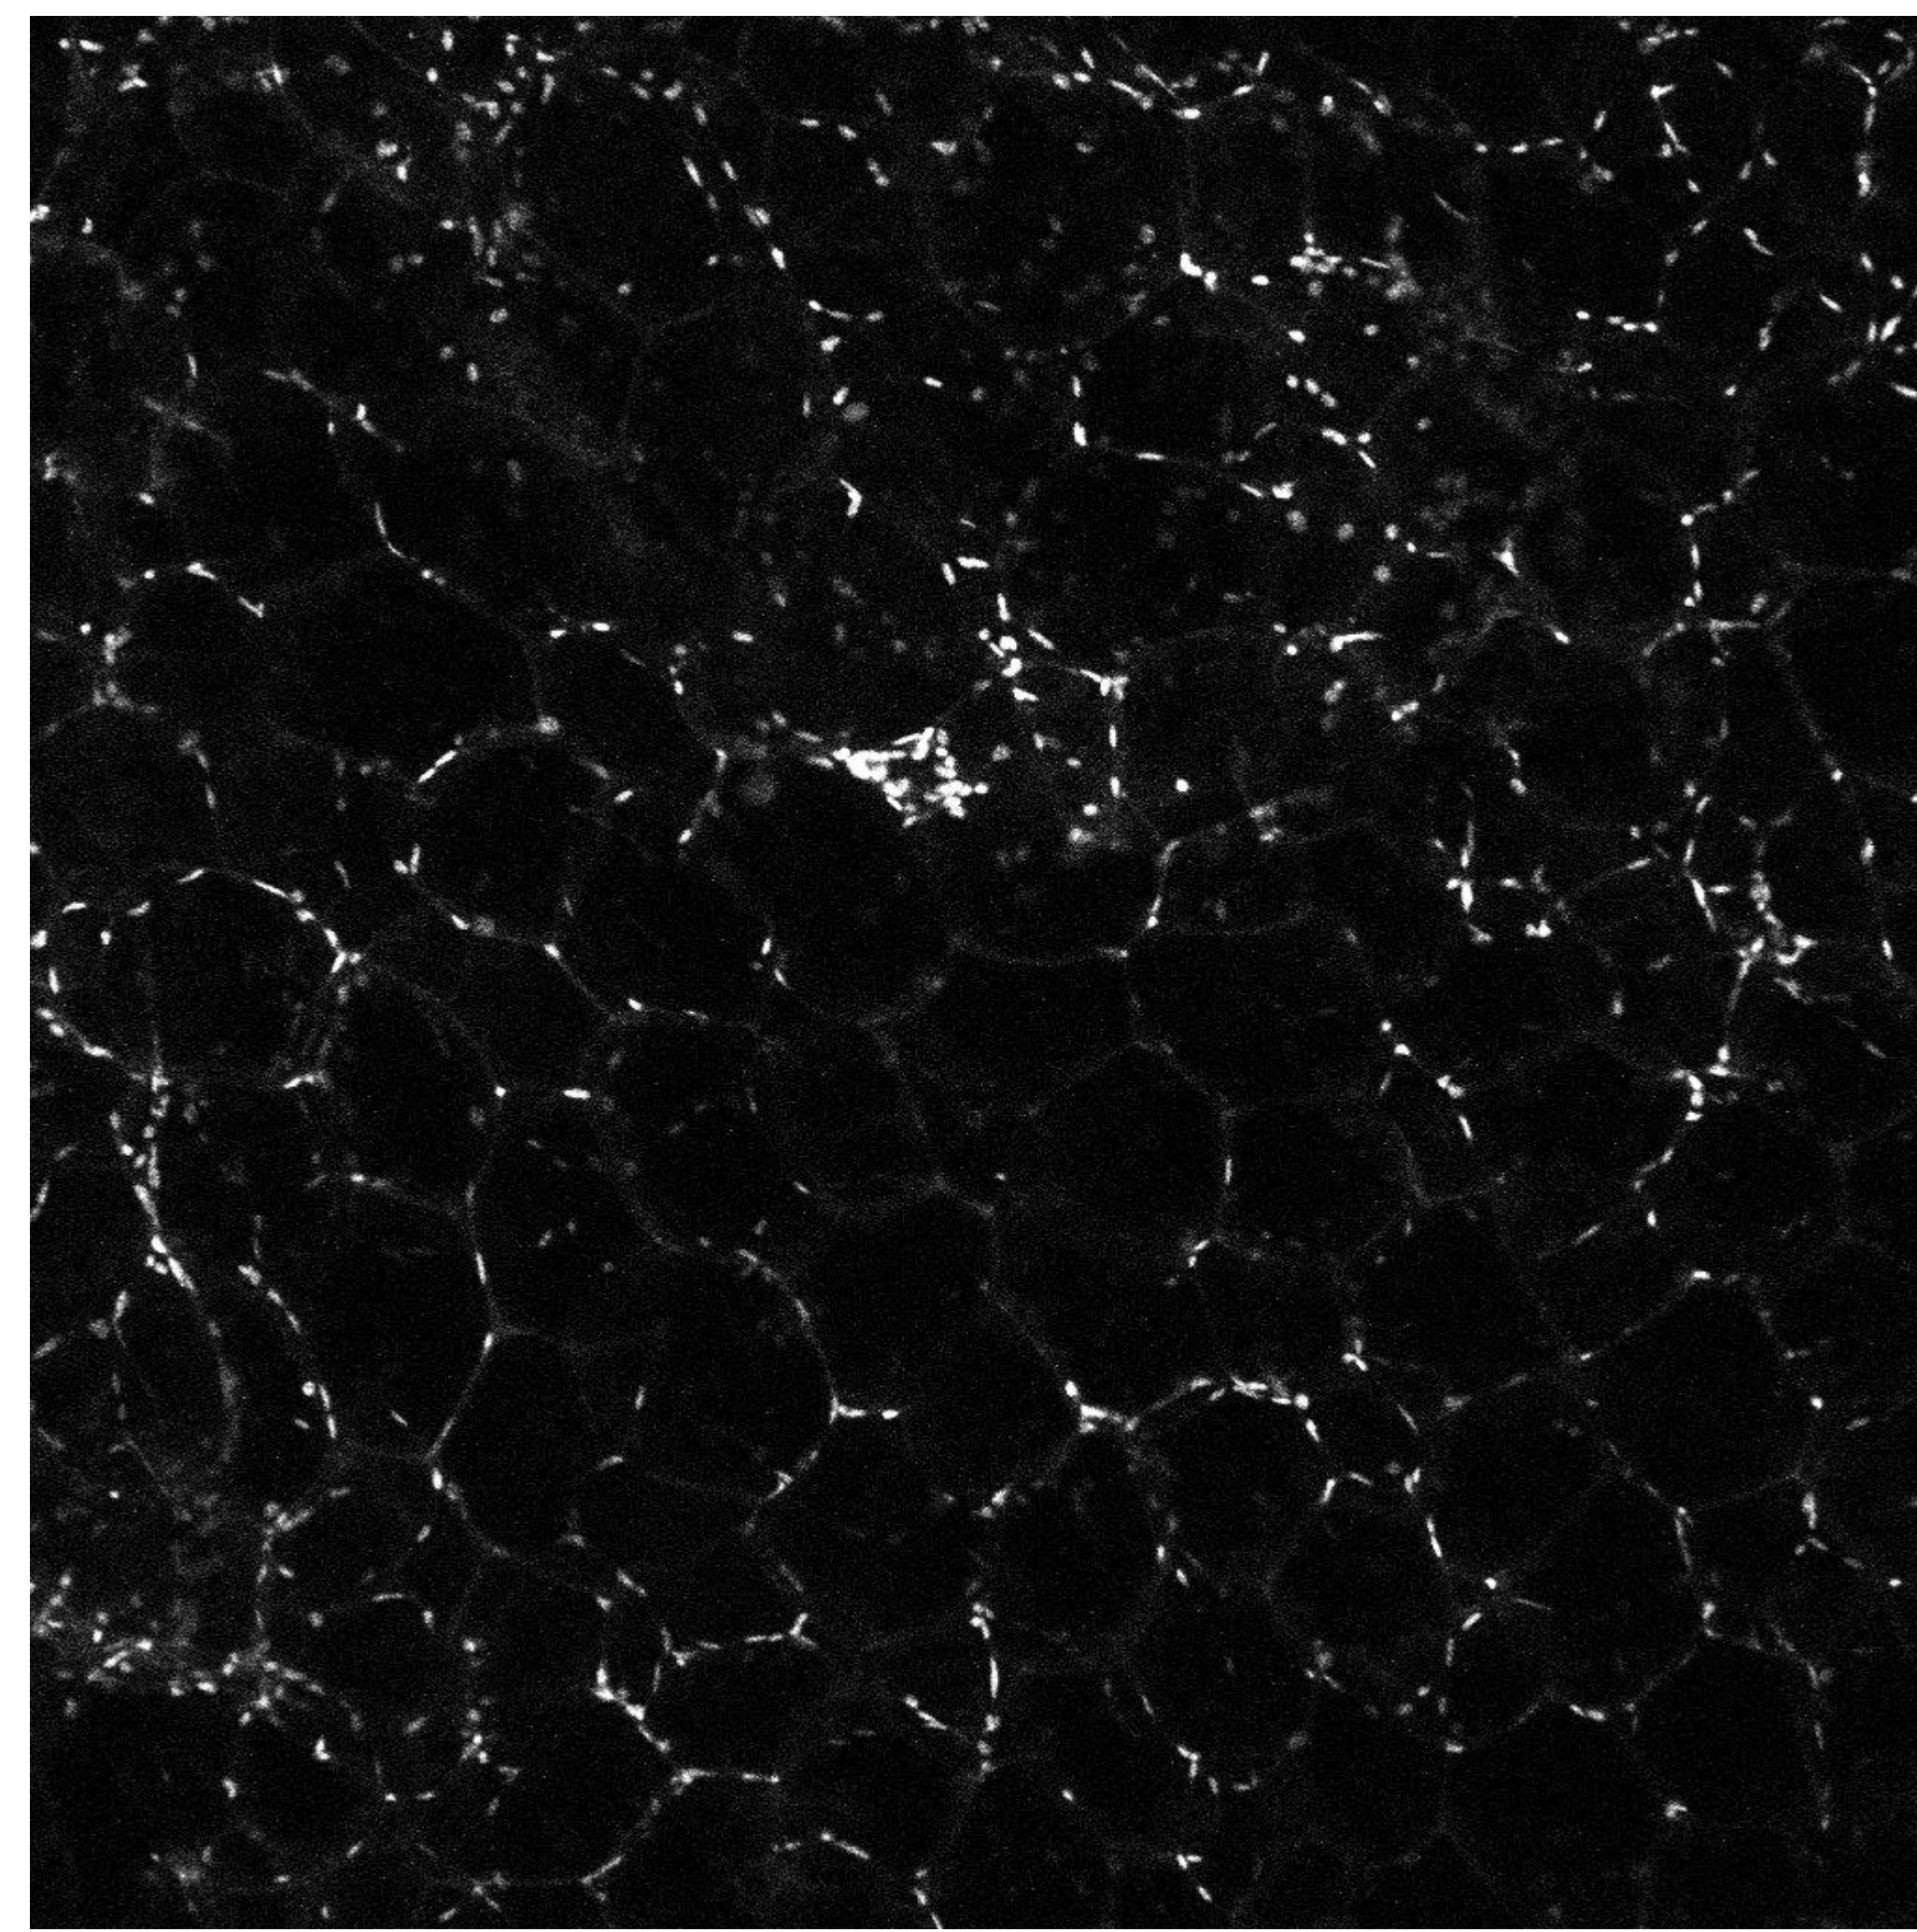

GFP

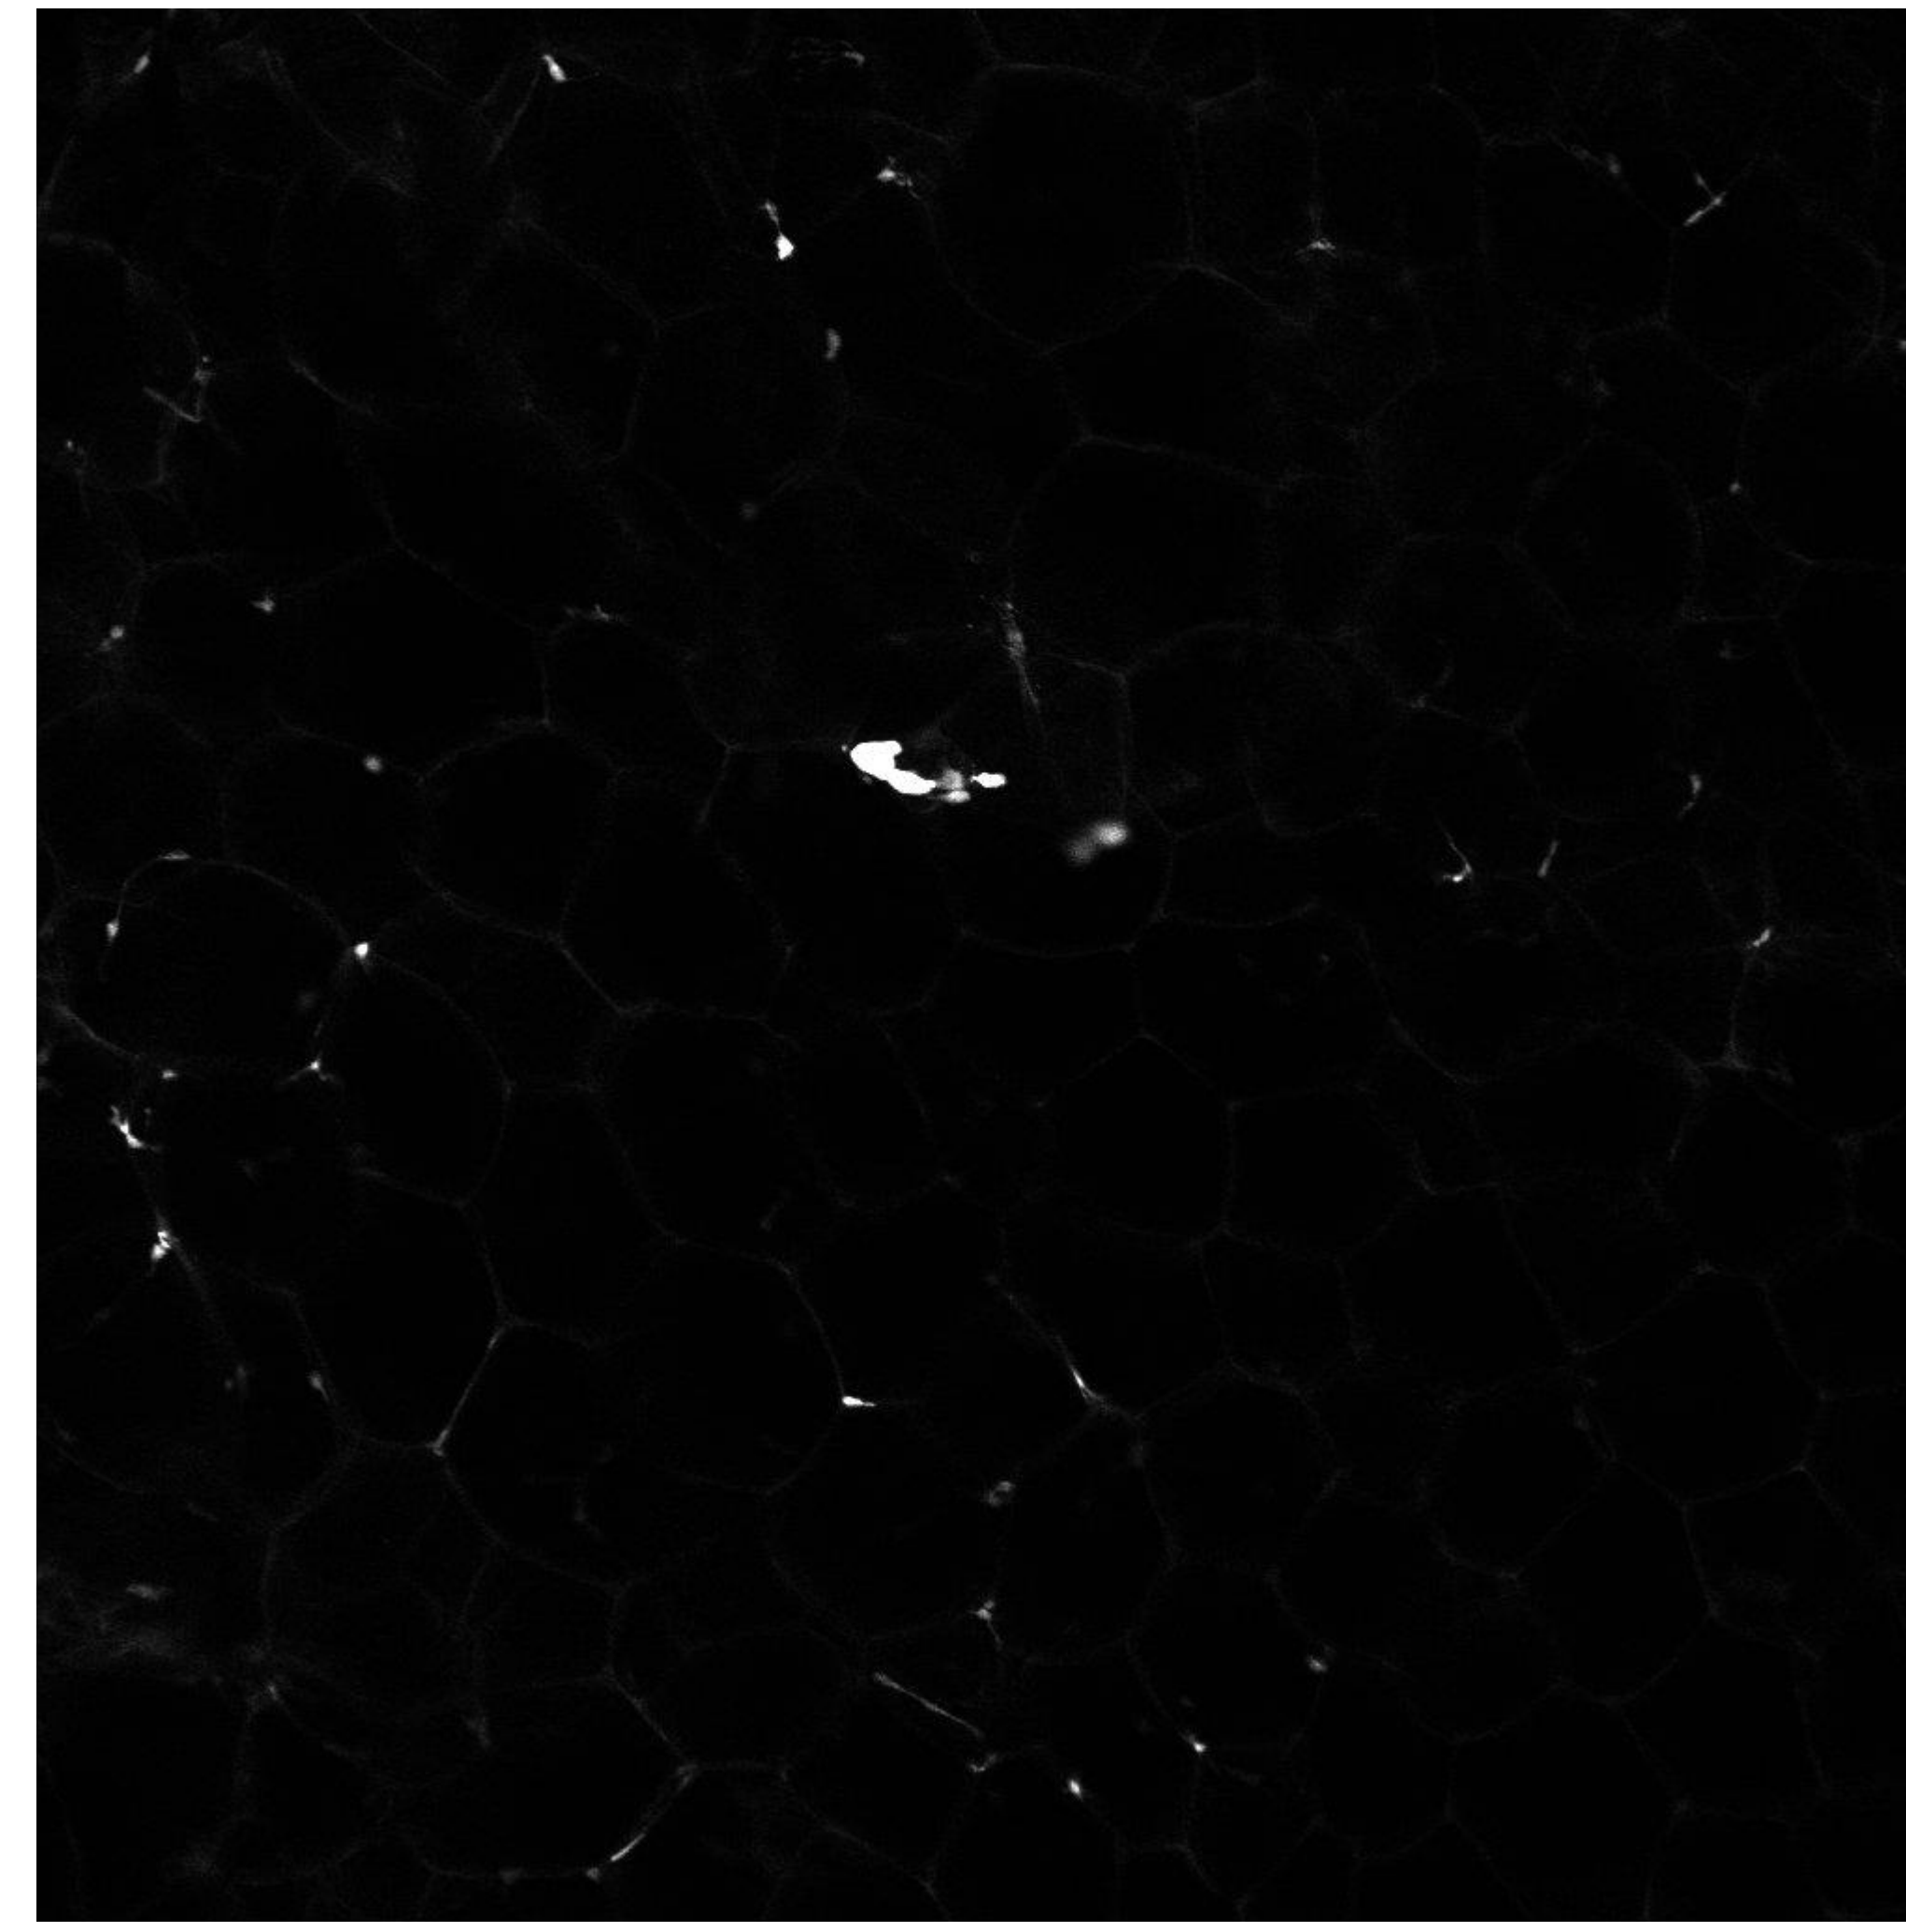

TdTomato/RFP

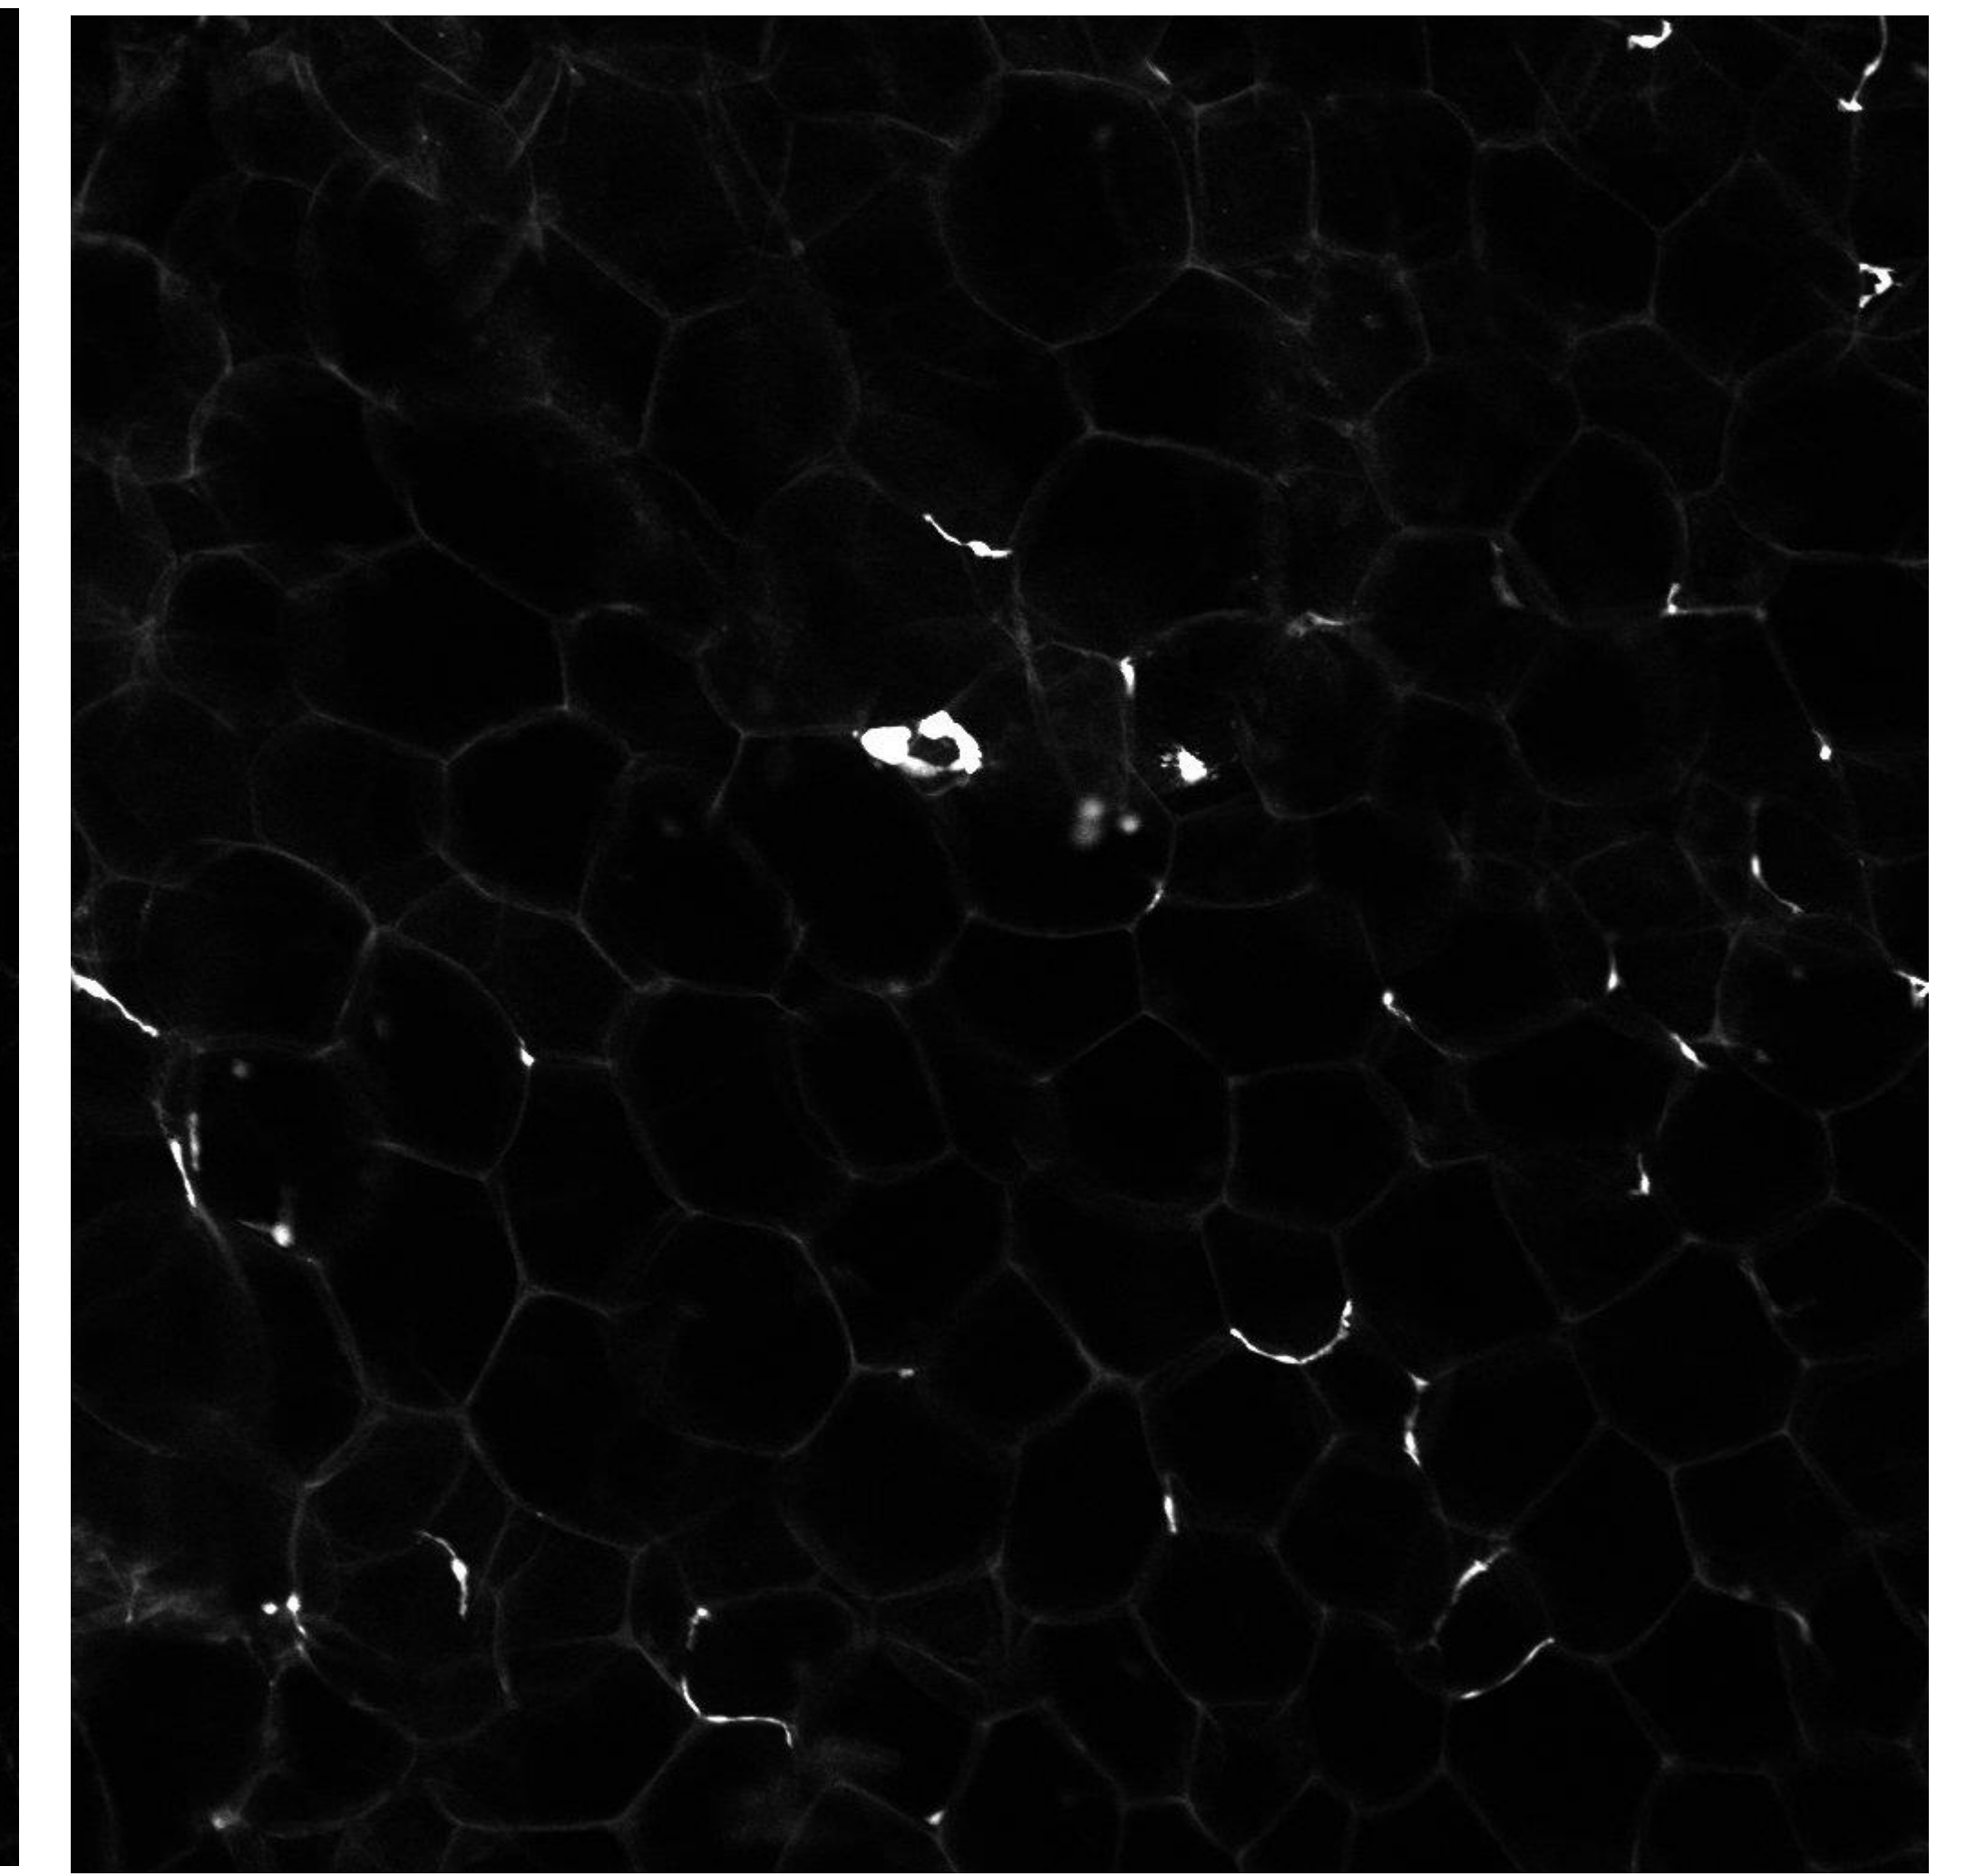

Unprocessed Images Figure 5D

EWAT, male obese, KonFATtie, 40x

Merge

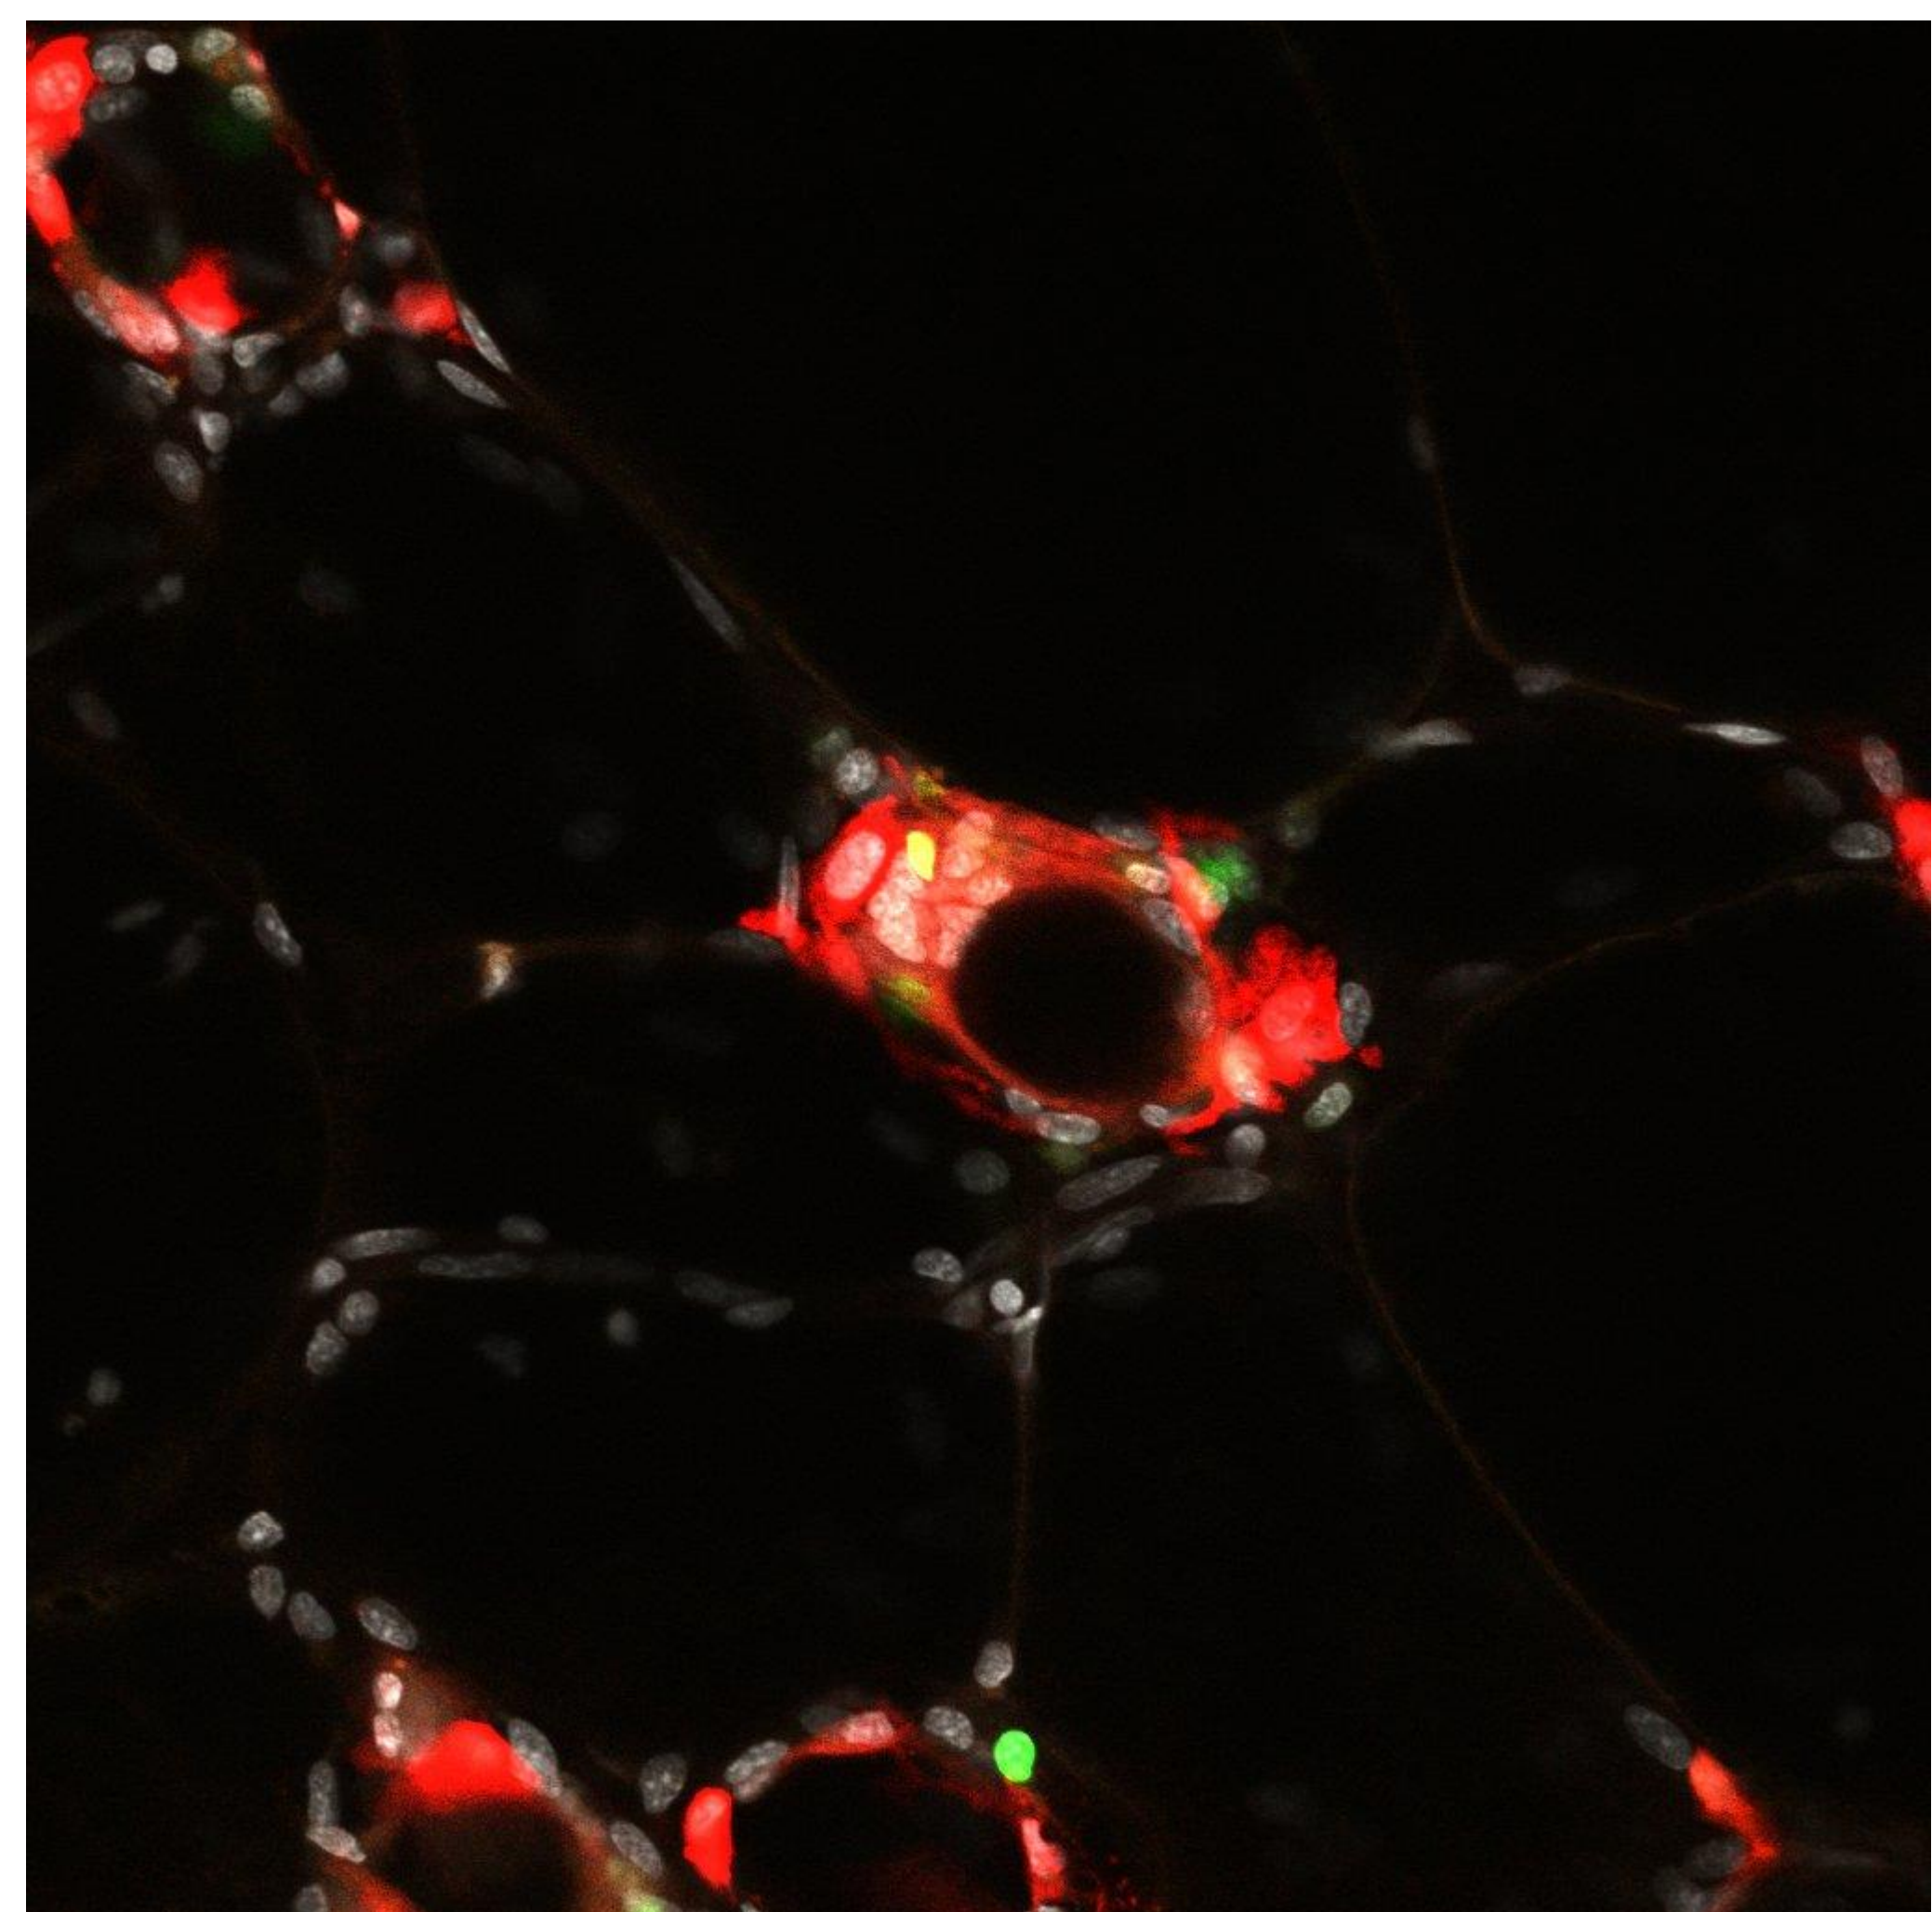

DRAQ5

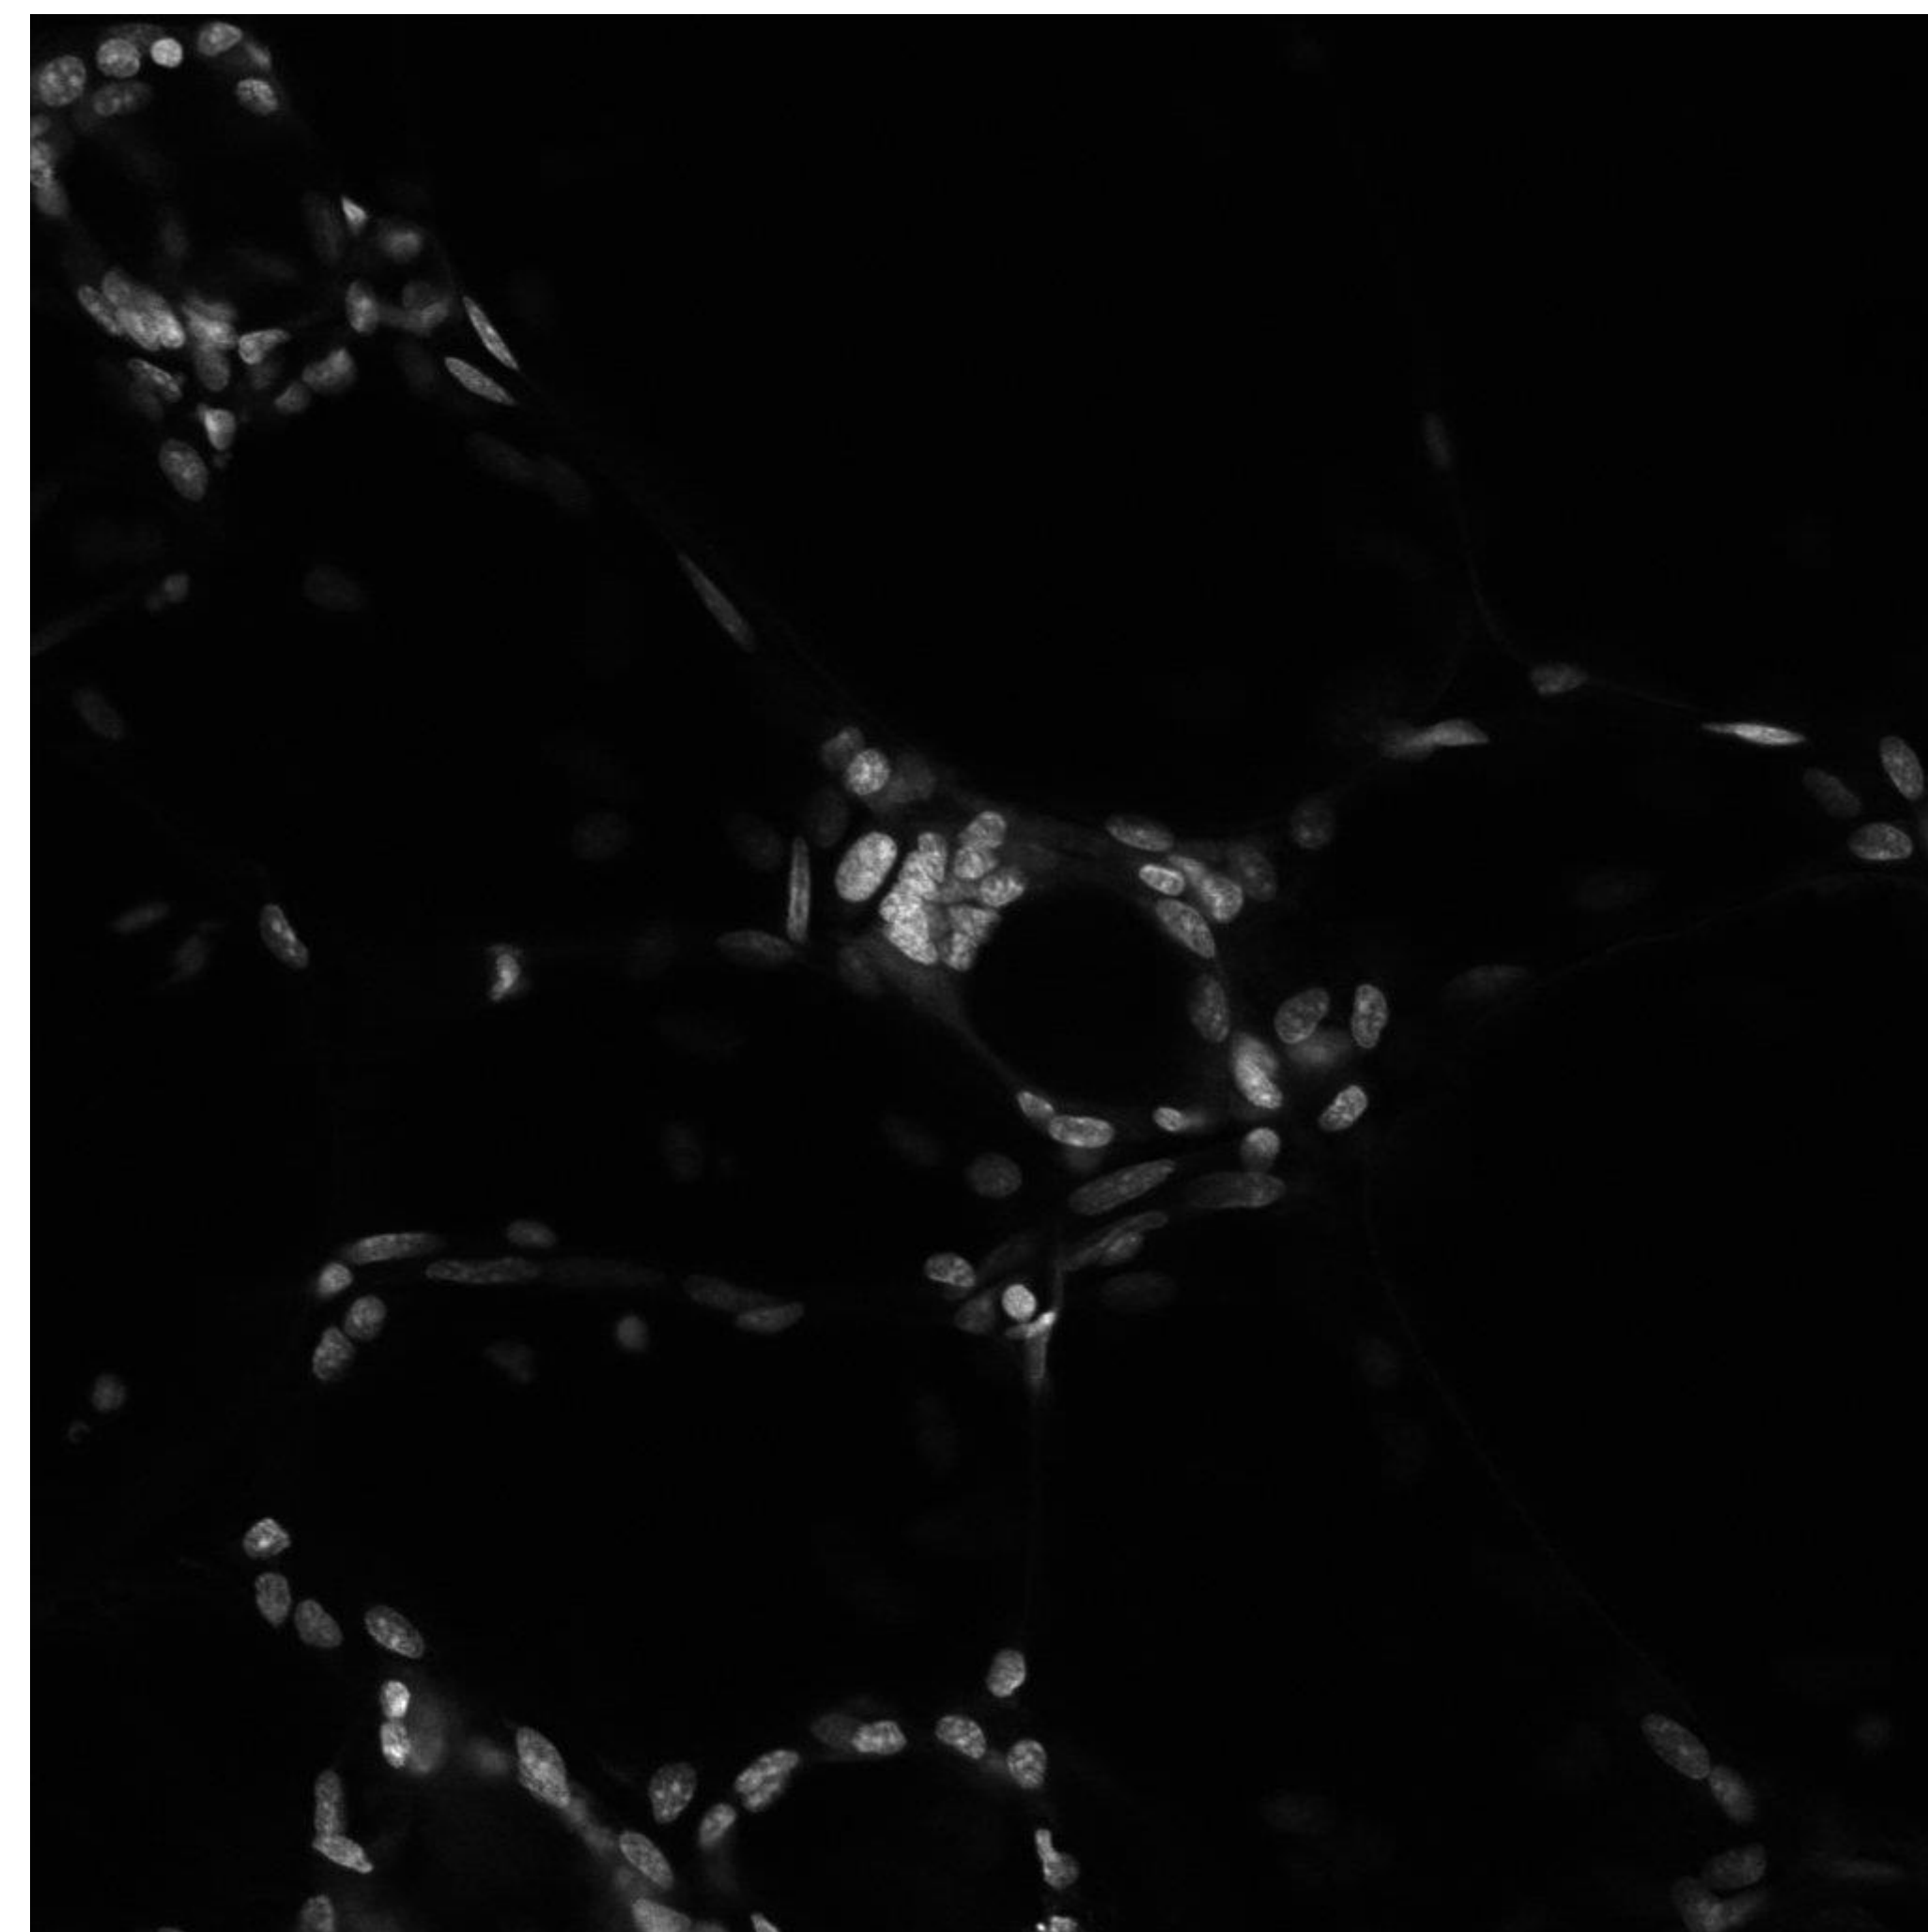

GFP/YFP

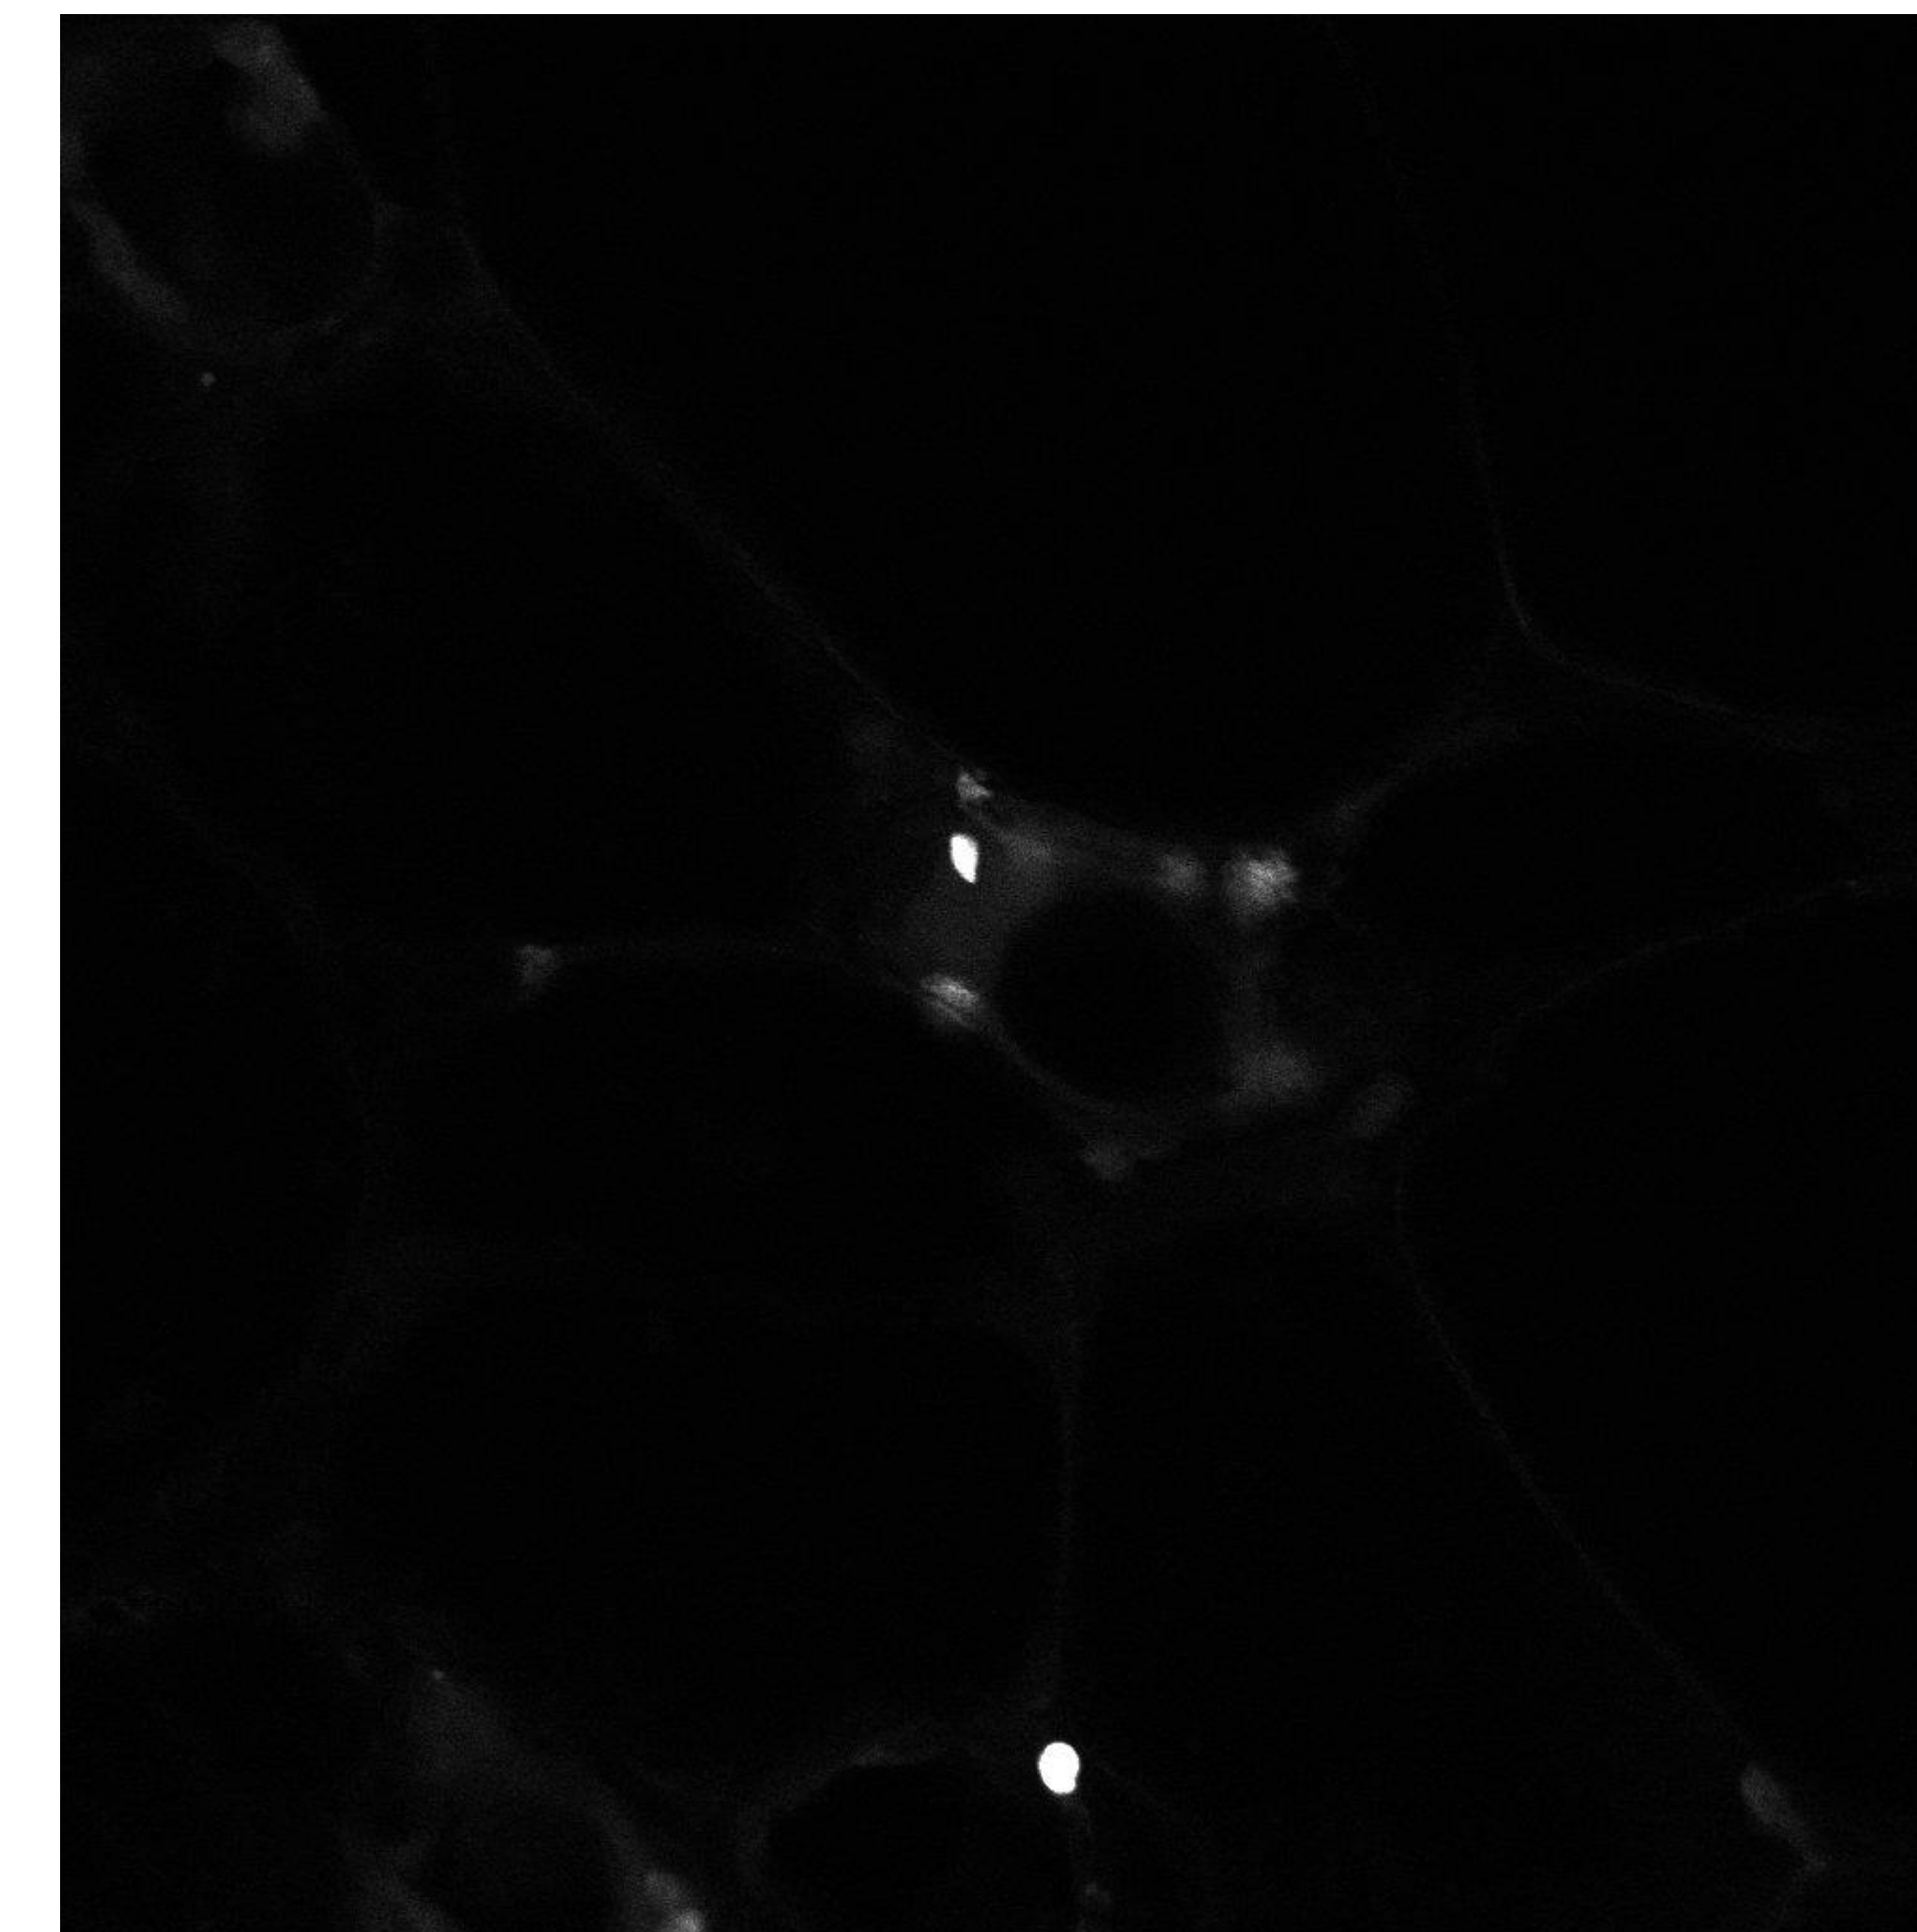

RFP

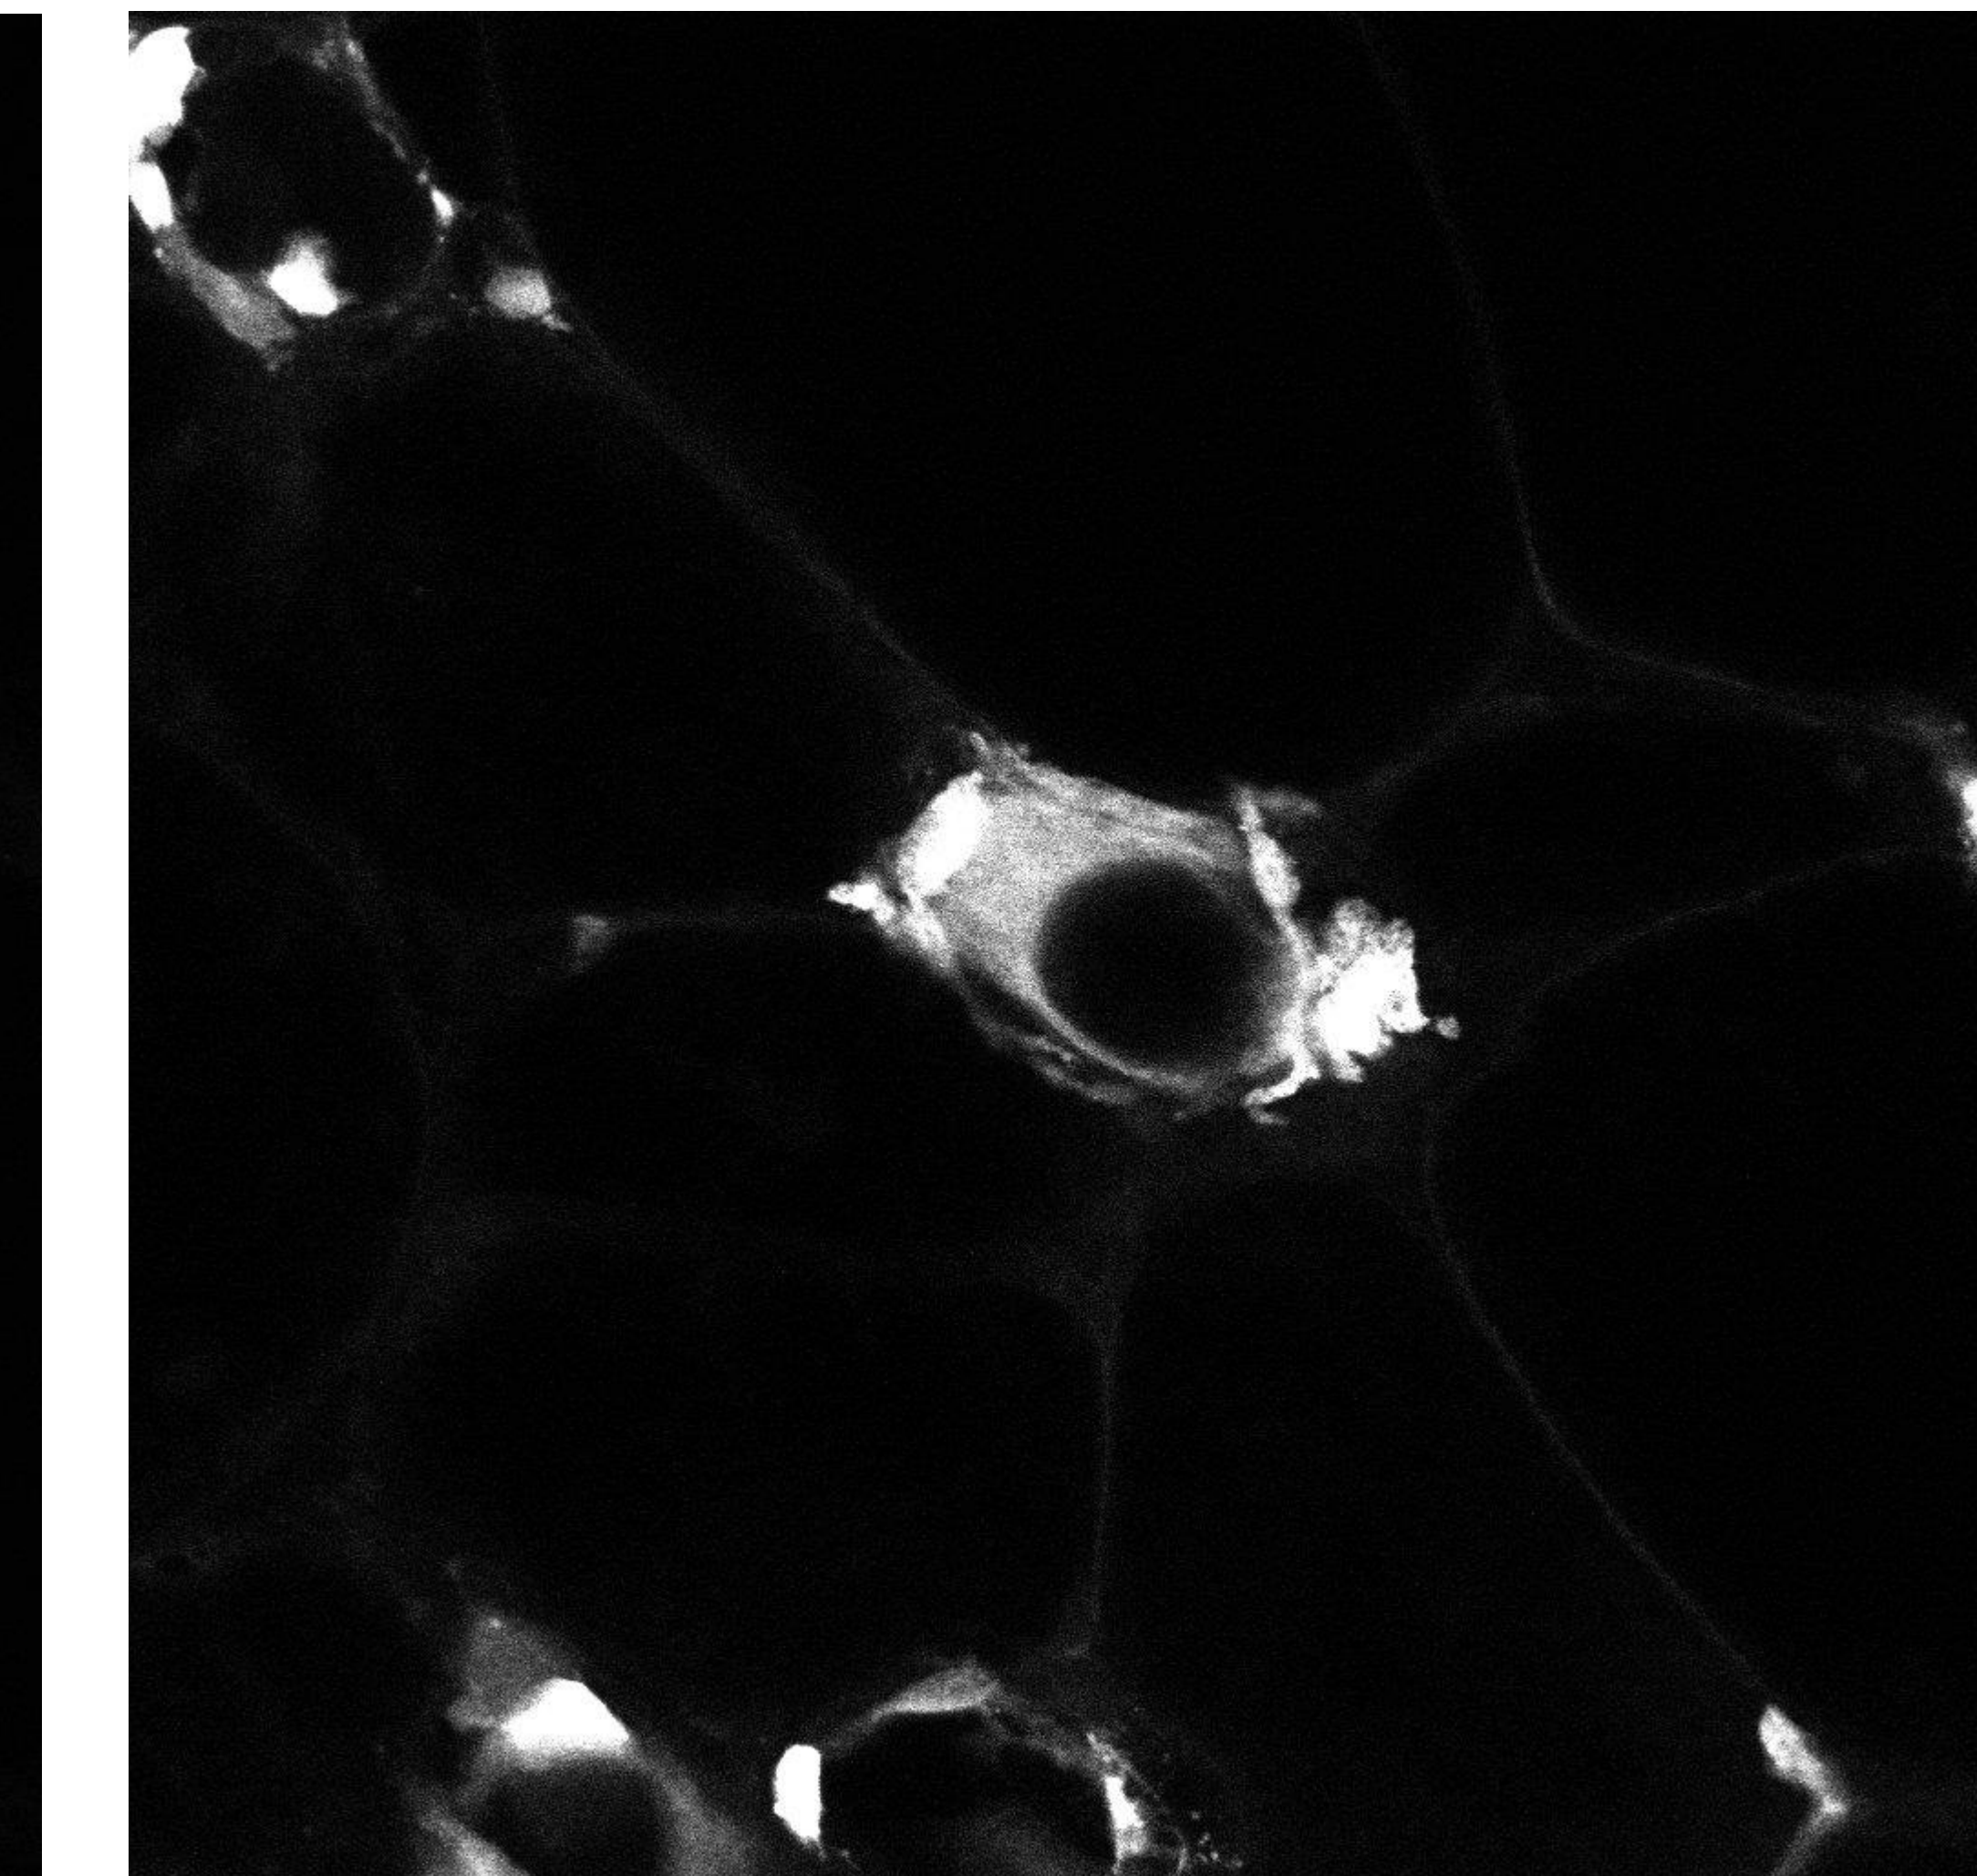

Supplement: Supplementary file 3 [file dba2e795f08217aa42359d1b.pdf]
