# Supplementary material
Source: Research Square preprint supplement (doi:10.21203/rs.3.rs-9655959/v1)
Supplement: Supplementary file 1 [file 8632e41ddb2a48776d1625fb.pdf]

| <b>GeneID</b> | <b>Base mean</b> | <b>log2(FC)</b> | <b>P-adj</b> |
|---------------|------------------|-----------------|--------------|
| Saa3          | 950,353446       | -3,390872       | 0,0005839    |
| Gm10715       | 2741,736049      | -3,294849       | 2,77E-05     |
| Gm10719       | 14535,03507      | -3,183743       | 8,80E-05     |
| Gm10722       | 3277,429563      | -3,182275       | 2,79E-05     |
| Gm21738       | 31823,92077      | -3,134615       | 0,0001048    |
| Gm10717       | 32259,57604      | -3,123977       | 0,0001403    |
| Gm11168       | 12750,39487      | -3,112951       | 8,14E-05     |
| Gm17535       | 869,1081412      | -3,04377        | 0,0006524    |
| Gm10801       | 67334,26877      | -3,021083       | 0,0004986    |
| Gm10718       | 4122,410307      | -2,972341       | 0,0007309    |
| Gm10800       | 280449,5928      | -2,969738       | 0,0004888    |
| Lamtor2       | 520,7096412      | -1,557481       | 1,35E-06     |
| Tppp3         | 1279,505684      | -1,537135       | 7,52E-08     |
| Plbd2         | 578,4028435      | -1,463141       | 5,21E-06     |
| Thbs1         | 1243,076229      | -1,362938       | 0,001267     |
| Ltc4s         | 546,2094681      | -1,352429       | 2,39E-05     |
| Cd209g        | 900,2030211      | -1,314219       | 1,74E-05     |
| Ucp2          | 31276,49901      | -1,304695       | 3,18E-08     |
| Fcna          | 783,1272038      | -1,265251       | 3,90E-05     |
| Hmox1         | 4934,521772      | -1,25421        | 1,41E-05     |
| Btbd2         | 1467,664281      | -1,07468        | 7,37E-05     |
| Pkm           | 2968,342712      | -1,064231       | 4,43E-05     |
| Rps10         | 3564,174163      | -1,052049       | 1,30E-07     |
| Cd63          | 18061,91598      | -1,047773       | 0,0052024    |
| Tnfsf13       | 1092,773315      | -1,032878       | 0,0011298    |
| Ifi2712a      | 2753,579319      | -1,016543       | 4,34E-08     |
| Fermt3        | 3243,178808      | -1,014172       | 4,09E-06     |
| Ly6e          | 4276,945559      | -1,006283       | 0,0006751    |
| Arpc1b        | 1114,368105      | -0,991444       | 0,0008885    |
| Arpc4         | 3220,107183      | -0,964827       | 0,0016555    |
| Snrpd1        | 1168,016347      | -0,961707       | 0,0056564    |
| Coro1a        | 1070,815698      | -0,951737       | 0,0004459    |
| Hcls1         | 789,8157001      | -0,939674       | 0,0026703    |
| Cfp           | 2011,270471      | -0,936949       | 8,02E-05     |
| Tspo          | 1653,082081      | -0,936238       | 0,0003446    |
| C1qa          | 8326,403804      | -0,932647       | 0,0008616    |
| Sec61g        | 3463,191716      | -0,909187       | 0,0014399    |
| Usp21         | 728,3838736      | -0,908397       | 0,0098199    |
| Ehd1          | 582,3592805      | -0,869858       | 0,008746     |
| Rhog          | 3456,674934      | -0,854247       | 0,0010987    |
| Rpl41         | 2313,852454      | -0,853634       | 0,0082868    |
| Dok2          | 939,2578934      | -0,845166       | 0,0012874    |
| Rps16         | 9062,485712      | -0,834268       | 0,0014403    |
| Pfdn5         | 1705,82609       | -0,814872       | 0,0005827    |
| Cd209f        | 2851,307791      | -0,810466       | 0,0057383    |
| H2-Ab1        | 33916,19051      | -0,798005       | 0,0089053    |
| Ifitm2        | 3395,930554      | -0,78647        | 0,0078852    |
| Psmg7         | 2270,743468      | -0,781742       | 0,0012105    |
| Ms4a6b        | 3690,690624      | -0,779967       | 0,0057383    |

|          |             |           |           |
|----------|-------------|-----------|-----------|
| Bsg      | 2414,340067 | -0,775529 | 0,0006627 |
| H2-Eb1   | 170977,7062 | -0,770422 | 0,0030163 |
| Eif3f    | 662,6646634 | -0,769575 | 0,0060535 |
| Drap1    | 1525,351461 | -0,765413 | 0,0099885 |
| Cyba     | 2283,917175 | -0,757496 | 0,0007309 |
| Selenow  | 2631,671868 | -0,756578 | 0,0074215 |
| Atp5e    | 1622,886759 | -0,75628  | 0,0055145 |
| Apoe     | 45721,21647 | -0,754747 | 0,0037796 |
| H2-DMA   | 921,9601081 | -0,753185 | 0,0090978 |
| H2-Aa    | 90639,62181 | -0,750457 | 0,0039015 |
| Tmed9    | 1432,702328 | -0,735844 | 0,0075914 |
| Tapbp    | 2209,703567 | -0,7293   | 0,000175  |
| Pld4     | 871,5271699 | -0,723806 | 0,0043322 |
| Epn1     | 1428,259384 | -0,697993 | 0,0023531 |
| Snrpb    | 852,3943404 | -0,676528 | 0,0061983 |
| AB124611 | 2096,480504 | -0,668245 | 0,0078799 |
| Marcksl1 | 7762,474672 | -0,656796 | 0,0046172 |
| Cnbp     | 1030,32292  | -0,651416 | 0,0088462 |
| Trim28   | 1333,319352 | -0,62199  | 0,0081661 |
| Atp6v0c  | 10646,70281 | -0,564804 | 0,0076101 |
| Emp3     | 6815,932879 | -0,561307 | 0,0036259 |
| Sgms1    | 2209,01283  | 0,6118471 | 0,0031256 |
| Serinc1  | 1229,476259 | 0,6222533 | 0,0099885 |
| Actn1    | 1719,516024 | 0,6257426 | 0,0070664 |
| Ctss     | 36780,92685 | 0,65298   | 0,0098808 |
| Abcg1    | 1451,159652 | 0,6635574 | 0,004113  |
| Cd200r1  | 807,0008963 | 0,6907351 | 0,0093928 |
| Cebpg    | 1282,730873 | 0,6958215 | 0,004236  |
| Tsc22d1  | 910,3633764 | 0,6990438 | 0,0078799 |
| Bnip3l   | 2488,764222 | 0,7076149 | 0,001088  |
| Nceh1    | 1506,718902 | 0,7225158 | 0,0093928 |
| Zmpste24 | 504,6536858 | 0,7316601 | 0,0085459 |
| Atp6v1a  | 7706,282728 | 0,7507377 | 0,0053177 |
| Stx12    | 737,2746796 | 0,7559451 | 0,0019992 |
| Sp1      | 2270,385054 | 0,769216  | 0,0099885 |
| Rnf128   | 1988,860339 | 0,770874  | 0,0039052 |
| Gpr137b  | 622,0216751 | 0,780189  | 0,0066396 |
| Soat1    | 1944,417532 | 0,7914105 | 0,0007309 |
| Fabp5    | 2918,41981  | 0,8038314 | 0,0024074 |
| Fosl2    | 1358,547866 | 0,8240017 | 0,0022625 |
| Fam214b  | 514,7669388 | 0,847012  | 0,0079439 |
| Cd36     | 19568,84871 | 0,8504067 | 0,0003255 |
| Tlk1     | 562,2726027 | 0,8525339 | 0,000786  |
| Npepps   | 877,5948178 | 0,8556164 | 0,0031769 |
| Rbm47    | 1028,006676 | 0,8796252 | 0,0074751 |
| Lrp12    | 981,1858275 | 0,8855314 | 0,0002309 |
| Adam8    | 740,9175188 | 0,8891769 | 0,0009116 |
| Adcy7    | 940,5967387 | 0,9017558 | 4,43E-05  |
| Anxa1    | 5563,555486 | 0,9179458 | 0,00095   |
| Plekhm3  | 833,1775139 | 0,9373222 | 0,0015526 |

|          |             |           |           |
|----------|-------------|-----------|-----------|
| Uhrf2    | 776,7410997 | 0,9485408 | 0,000317  |
| Tmem65   | 708,355339  | 0,9812329 | 0,0030163 |
| Lilrb4a  | 2350,116723 | 0,9866757 | 8,14E-05  |
| Fabp4    | 25986,19659 | 1,0297722 | 0,0013091 |
| Gpnmb    | 5336,754789 | 1,0453319 | 4,68E-06  |
| Gyg      | 979,6914459 | 1,0596447 | 8,80E-05  |
| mt-Co1   | 94631,5377  | 1,0855223 | 0,0027577 |
| Tnfaip2  | 637,0576143 | 1,1084823 | 1,61E-05  |
| Atp6v0d2 | 4468,04521  | 1,1160411 | 0,0001521 |
| Tmcc3    | 1926,611335 | 1,1233945 | 7,50E-05  |
| P2ry10b  | 1024,290915 | 1,1832667 | 0,0006751 |
| Lilr4b   | 1047,787838 | 1,2136713 | 0,0001003 |
| Pnlsr    | 1082,533229 | 1,2571683 | 0,0085518 |
| Igf2r    | 2369,523626 | 1,2914092 | 5,72E-06  |
| Ly6c1    | 528,6189435 | 1,3285027 | 0,0032849 |
| Cav1     | 627,7532593 | 1,5327466 | 0,0002455 |
| Pecam1   | 515,3090502 | 1,7092714 | 0,0013539 |
| Mmp12    | 4133,934746 | 1,7226899 | 3,28E-09  |
