# Supplementary material
Source: Research Square preprint supplement (doi:10.21203/rs.3.rs-9655959/v1)
Supplement: Supplementary file 2 [file c94483dd2e2c996363fabc19.pdf]

| Macrophages | cluster | gene     | avg_log2FC  | p_val_adj  |
|-------------|---------|----------|-------------|------------|
|             | c1      | Mmp12    | 2,031735298 | 0          |
|             | c1      | Gpnmb    | 1,547602895 | 0          |
|             | c1      | Itgb2    | 1,360465606 | 1,04E-214  |
|             | c1      | Wfs1     | 1,828611695 | 5,64E-183  |
|             | c1      | Creg1    | 1,426797203 | 1,39E-170  |
|             | c1      | Ctsk     | 1,527949859 | 2,25E-143  |
|             | c1      | Cd9      | 1,164759287 | 2,88E-135  |
|             | c1      | Rnf128   | 1,754521514 | 5,55E-134  |
|             | c1      | Cdkn1c   | 3,989083207 | 1,71E-127  |
|             | c1      | Ctsl     | 1,11251647  | 1,71E-120  |
|             | c1      | Anpep    | 1,171752433 | 9,84E-115  |
|             | c1      | Prdx1    | 1,420095429 | 9,42E-94   |
|             | c1      | Itgax    | 1,944636441 | 1,87E-93   |
|             | c1      | Mamdc2   | 2,805686068 | 2,46E-90   |
|             | c1      | Uchl1    | 3,039514667 | 2,46E-86   |
|             | c1      | Hvcn1    | 2,746884243 | 1,04E-77   |
|             | c1      | Sema4d   | 1,288987385 | 1,72E-73   |
|             | c1      | Pla2g7   | 1,337232313 | 2,79E-71   |
|             | c1      | Mmp19    | 1,76965491  | 3,34E-67   |
|             | c1      | Hgsnat   | 1,979734447 | 7,80E-67   |
|             | c2      | Hmg20b   | 4,154287173 | 1,21E-147  |
|             | c2      | Cpeb2    | 3,403238022 | 5,23E-92   |
|             | c2      | Triap1   | 3,505319058 | 1,33E-81   |
|             | c2      | Exoc1    | 3,709723736 | 1,23E-80   |
|             | c2      | Efr3b    | 3,191223332 | 1,05E-60   |
|             | c2      | Slc25a45 | 2,92201302  | 3,25E-58   |
|             | c2      | Sigmar1  | 3,061296367 | 4,09E-58   |
|             | c2      | Maoa     | 3,095851795 | 2,50E-51   |
|             | c2      | Gde1     | 3,213993176 | 1,22E-50   |
|             | c2      | Snu13    | 2,898484866 | 1,26E-50   |
|             | c2      | Gprc5b   | 2,955580192 | 1,85E-47   |
|             | c2      | Rab32    | 2,785717799 | 1,78E-44   |
|             | c2      | Trappc2l | 2,905589667 | 2,50E-41   |
|             | c2      | Prkch    | 2,434876478 | 4,97E-36   |
|             | c2      | Ms4a14   | 2,60260444  | 1,92E-33   |
|             | c2      | Gemin7   | 2,670430508 | 1,68E-31   |
|             | c2      | Slc49a4  | 2,672880547 | 5,99E-28   |
|             | c2      | Umps     | 2,55351194  | 1,30E-23   |
|             | c2      | Pgrmc2   | 1,950319301 | 4,76E-14   |
|             | c2      | Ube2d1   | 1,347908879 | 0,01241934 |
|             | c3      | Zranb3   | 3,35532715  | 4,58E-167  |
|             | c3      | Txn1     | 3,801822109 | 7,10E-149  |
|             | c3      | Khsrp    | 3,890455903 | 1,12E-126  |
|             | c3      | Naaa     | 3,990137691 | 2,08E-124  |
|             | c3      | Pcdh7    | 3,454284064 | 1,24E-121  |
|             | c3      | Rasgrp3  | 4,25988787  | 7,95E-117  |
|             | c3      | Ssbp4    | 3,029740372 | 2,35E-57   |

|    |          |             |            |
|----|----------|-------------|------------|
| c3 | Atxn7l3b | 2,793575289 | 2,53E-30   |
| c3 | Ckb      | 1,396211022 | 0,00024409 |
| c3 | Mif4gd   | 1,936321021 | 0,00049447 |
| c3 | Ndufa9   | 1,775575074 | 0,28583379 |
| c3 | Ttpal    | 1,483700825 | 1          |
| c3 | Mta3     | 1,448799247 | 1          |
| c3 | Cep164   | 1,892972688 | 1          |
| c3 | Fam222b  | 1,354683949 | 1          |
| c3 | Sox4     | 1,401313973 | 1          |
| c3 | Strada   | 1,860724941 | 1          |
| c3 | Apobr    | 1,024566596 | 1          |
| c3 | lft52    | 1,002125333 | 1          |
| c3 | Coa4     | 1,364948891 | 1          |
| c4 | Ndufs4   | 4,886588406 | 1,73E-207  |
| c4 | Cited2   | 4,375428062 | 1,13E-199  |
| c4 | Mpc2     | 4,424228692 | 1,20E-188  |
| c4 | Supt4a   | 4,417063982 | 1,39E-181  |
| c4 | Kansl1   | 4,144452943 | 4,69E-168  |
| c4 | Kars     | 4,287069094 | 1,04E-114  |
| c4 | Trrap    | 4,02028488  | 4,97E-106  |
| c4 | Pex11b   | 2,102974276 | 0,05995526 |
| c4 | Heca     | 1,743115673 | 0,11668141 |
| c4 | Gdf3     | 2,531191167 | 0,13423205 |
| c4 | Ankhd1   | 2,002444576 | 0,30356612 |
| c4 | Ankdd1a  | 1,597905464 | 0,58909973 |
| c4 | Zfp422   | 1,502281925 | 1          |
| c4 | Traf3ip1 | 1,344077754 | 1          |
| c4 | Deaf1    | 1,710123596 | 1          |
| c4 | H3c14    | 2,492457184 | 1          |
| c4 | Rab28    | 1,516065727 | 1          |
| c4 | Npepl1   | 1,097995697 | 1          |
| c4 | Twf1     | 1,490239896 | 1          |
| c4 | Clec4b1  | 1,446366577 | 1          |
| c5 | Upf3b    | 6,688670932 | 0          |
| c5 | Abcf1    | 5,715549925 | 0          |
| c5 | Mocos    | 5,107432811 | 1,63E-284  |
| c5 | Zkscan1  | 2,092043408 | 0,00305817 |
| c5 | Parp10   | 2,396516295 | 0,00504571 |
| c5 | Cwf19l2  | 2,854255752 | 0,00652815 |
| c5 | Cyp4f18  | 3,125120251 | 0,04287205 |
| c5 | Ttc32    | 3,238840189 | 0,09911149 |
| c5 | Zmynd15  | 2,769447994 | 0,13091664 |
| c5 | Psrc1    | 2,968048184 | 0,33092564 |
| c5 | Nsf      | 1,689547256 | 0,38183054 |
| c5 | lqcb1    | 3,097178031 | 0,51212982 |
| c5 | Car15    | 1,927545132 | 0,51980311 |
| c5 | Il18     | 2,978493999 | 0,61716528 |
| c5 | Ctnnd1   | 1,435765415 | 1          |

|                |                |             |                   |                  |
|----------------|----------------|-------------|-------------------|------------------|
| c5             | Tstd3          | 2,133998541 | 1                 |                  |
| c5             | Nfkbid         | 3,080843639 | 1                 |                  |
| c5             | Ppp1r15b       | 2,09203066  | 1                 |                  |
| c5             | Pard6a         | 2,557080476 | 1                 |                  |
| c5             | Abca8b         | 2,473041179 | 1                 |                  |
| c6             | Pacc1          | 6,545888344 | 0                 |                  |
| c6             | Gadd45b        | 6,18644353  | 0                 |                  |
| c6             | Pdik1l         | 3,211545327 | 1,93E-05          |                  |
| c6             | Gas2l3         | 2,02521188  | 0,00220942        |                  |
| c6             | H2ac10         | 4,153126609 | 0,00472707        |                  |
| c6             | Ttc9           | 3,840818217 | 0,00475721        |                  |
| c6             | Sqle           | 3,443418767 | 0,00742169        |                  |
| c6             | Dcaf10         | 2,706640856 | 0,04360297        |                  |
| c6             | Uhrf1          | 1,892905831 | 0,26660728        |                  |
| c6             | Dnal4          | 2,024256333 | 0,5542589         |                  |
| c6             | Bcl10          | 2,161122442 | 0,80651985        |                  |
| c6             | Zscan21        | 3,211124919 | 0,87463578        |                  |
| c6             | Klhdc1         | 3,041753947 | 1                 |                  |
| c6             | Plpp7          | 2,854381134 | 1                 |                  |
| c6             | Ticrr          | 2,659113015 | 1                 |                  |
| c6             | Rreb1          | 1,346628306 | 1                 |                  |
| c6             | Zbtb14         | 2,324365449 | 1                 |                  |
| c6             | Wdr83          | 3,001221459 | 1                 |                  |
| c6             | Gnb1l          | 3,786223859 | 1                 |                  |
| c6             | Slc6a8         | 1,373750366 | 1                 |                  |
| c7             | Mark4          | 4,434782603 | 2,93E-178         |                  |
| c7             | Araf           | 4,027497537 | 7,75E-140         |                  |
| c7             | Il1r1          | 4,021690293 | 1,75E-133         |                  |
| c7             | Hacd3          | 4,134864346 | 1,90E-124         |                  |
| c7             | Inpp5k         | 3,885913776 | 9,99E-90          |                  |
| c7             | Ubxn7          | 3,457090781 | 3,97E-86          |                  |
| c7             | Slc3a2         | 3,174444699 | 1,18E-83          |                  |
| c7             | Ddit3          | 3,120564783 | 3,18E-81          |                  |
| c7             | Tmem267        | 3,14182737  | 1,80E-57          |                  |
| c7             | Abca3          | 3,501712613 | 5,27E-53          |                  |
| c7             | Snx10          | 3,279582222 | 2,94E-51          |                  |
| c7             | Lrch3          | 2,703209079 | 1,25E-31          |                  |
| c7             | Ndufb1         | 2,801953521 | 5,12E-25          |                  |
| c7             | Smim12         | 1,665656712 | 0,4416492         |                  |
| c7             | Ube2o          | 1,976449404 | 1                 |                  |
| c7             | Ankrd13b       | 1,358845549 | 1                 |                  |
| c7             | Mndal          | 1,316216572 | 1                 |                  |
| c7             | Zfp607a        | 1,599322687 | 1                 |                  |
| c7             | Tcp11l2        | 1,160939015 | 1                 |                  |
| c7             | Ankdd1a        | 1,018228458 | 1                 |                  |
| <b>T-cells</b> | <b>cluster</b> | <b>gene</b> | <b>avg_log2FC</b> | <b>p_val_adj</b> |
|                | c8             | Saa3        | 5,965436243       | 0                |
|                | c8             | Sfrp1       | 5,578697925       | 0                |

|    |           |             |           |
|----|-----------|-------------|-----------|
| c8 | Cxcl9     | 7,152175204 | 0         |
| c8 | Gbp2      | 5,511845298 | 0         |
| c8 | Igkc      | 6,664288013 | 5,61E-189 |
| c8 | Ccl5      | 4,513363211 | 3,49E-138 |
| c8 | Slpi      | 4,355747601 | 3,44E-120 |
| c8 | C3        | 1,720332508 | 1,30E-107 |
| c8 | Serpina3g | 4,302862969 | 3,55E-89  |
| c8 | Stat1     | 2,659551337 | 1,69E-73  |
| c8 | Marcks11  | 2,966329331 | 3,79E-72  |
| c8 | Sh2d2a    | 3,987541182 | 6,32E-60  |
| c8 | Lyz2      | 1,068834714 | 7,62E-53  |
| c8 | H2-Eb1    | 1,132026792 | 1,75E-51  |
| c8 | Itgal     | 3,49744151  | 3,02E-49  |
| c8 | Il2rb     | 3,976175592 | 4,08E-48  |
| c8 | Il21r     | 3,153187117 | 5,74E-46  |
| c8 | Gimap3    | 4,366295898 | 2,69E-45  |
| c8 | Lcn2      | 2,899386617 | 2,97E-43  |
| c8 | Lck       | 4,372847826 | 7,35E-41  |

| <b>Mast cells</b> | <b>cluster</b> | <b>gene</b> | <b>avg_log2FC</b> | <b>p_val_adj</b> |
|-------------------|----------------|-------------|-------------------|------------------|
|                   | c11            | Tpsb2       | 6,891031457       | 0                |
|                   | c11            | Cma1        | 6,507685974       | 0                |
|                   | c11            | Mcpt4       | 8,55924409        | 0                |
|                   | c11            | Cpa3        | 6,161809474       | 0                |
|                   | c11            | Tpsab1      | 5,94092458        | 3,05E-210        |
|                   | c11            | Il1rl1      | 4,983885159       | 1,28E-168        |
|                   | c11            | Fcer1a      | 4,270155492       | 1,74E-57         |
|                   | c11            | Hdc         | 5,47701332        | 2,23E-57         |
|                   | c11            | Mrgprb1     | 4,327323558       | 2,83E-52         |
|                   | c11            | Kit         | 4,000078497       | 1,66E-50         |
|                   | c11            | Tph1        | 5,685333253       | 5,82E-38         |
|                   | c11            | Ms4a2       | 5,059844101       | 1,09E-24         |
|                   | c11            | Mrgprx2     | 4,812689068       | 1,78E-19         |
|                   | c11            | Myb         | 4,354310284       | 2,68E-15         |
|                   | c11            | Cyp11a1     | 5,201393356       | 1,99E-14         |
|                   | c11            | Gpr141b     | 4,925841891       | 2,01E-14         |
|                   | c11            | Tpsg1       | 4,67618537        | 1,14E-12         |
|                   | c11            | Rab44       | 3,779276962       | 2,15E-12         |
|                   | c11            | Serpinb1a   | 3,370643854       | 3,89E-12         |
|                   | c11            | Cd200r3     | 5,017328631       | 5,63E-10         |

| <b>Fibroblasts</b> | <b>cluster</b> | <b>gene</b> | <b>avg_log2FC</b> | <b>p_val_adj</b> |
|--------------------|----------------|-------------|-------------------|------------------|
|                    | c12            | Tmem192     | 5,611040755       | 0                |
|                    | c12            | Col6a5      | 5,132959825       | 0                |
|                    | c12            | Sdhd        | 5,006721809       | 2,64E-230        |
|                    | c12            | Gpam        | 3,893069487       | 3,17E-74         |
|                    | c12            | Scnn1a      | 6,269868121       | 6,34E-13         |
|                    | c12            | Adamts5     | 2,4349031         | 1,23E-09         |
|                    | c12            | Nphp3       | 2,792561001       | 0,01594025       |
|                    | c12            | Ndc80       | 2,540448418       | 0,44501169       |

|                   |                |             |                   |                  |
|-------------------|----------------|-------------|-------------------|------------------|
| c12               | Fkbp1b         | 1,776562804 | 0,83988493        |                  |
| c12               | Ndc1           | 2,37093149  | 1                 |                  |
| c12               | Slc12a9        | 1,975478781 | 1                 |                  |
| c12               | Sardh          | 2,347909338 | 1                 |                  |
| c12               | Adamts14       | 2,228411599 | 1                 |                  |
| c12               | Trpm4          | 2,052922718 | 1                 |                  |
| c12               | Chsy1          | 1,943557483 | 1                 |                  |
| c12               | Pstpip2        | 2,426366009 | 1                 |                  |
| c12               | Zfp748         | 2,336903188 | 1                 |                  |
| c12               | Ablim3         | 1,812475595 | 1                 |                  |
| c12               | Capza2         | 1,444163129 | 1                 |                  |
| c12               | Riok2          | 1,46000602  | 1                 |                  |
| c13               | Ccn2           | 7,496928912 | 0                 |                  |
| c13               | Serpine1       | 5,507064611 | 0                 |                  |
| c13               | Thbs1          | 4,411304878 | 1,45E-282         |                  |
| c13               | Tnc            | 3,207573495 | 4,52E-16          |                  |
| c13               | Arc            | 4,699130602 | 5,88E-16          |                  |
| c13               | Col3a1         | 1,085688314 | 1,66E-15          |                  |
| c13               | Fbn1           | 1,526094442 | 7,45E-06          |                  |
| c13               | Egr3           | 3,448398189 | 0,00020396        |                  |
| c13               | Fn1            | 1,155087341 | 0,00072984        |                  |
| c13               | Ccn1           | 2,023018145 | 0,00152166        |                  |
| c13               | Mettl17        | 3,032538537 | 0,0015824         |                  |
| c13               | Mfap4          | 2,72661885  | 0,00684333        |                  |
| c13               | Spry1          | 1,580617898 | 0,01514374        |                  |
| c13               | Svep1          | 1,583623982 | 0,02846061        |                  |
| c13               | Egr1           | 1,862789536 | 0,0354441         |                  |
| c13               | Cyp26b1        | 3,210350265 | 0,05845289        |                  |
| c13               | Fam78b         | 2,149508239 | 0,09935301        |                  |
| c13               | Prkab2         | 2,396106989 | 0,10573466        |                  |
| c13               | Pde1a          | 3,150860241 | 0,10710678        |                  |
| c13               | Lmbr1          | 3,499657331 | 0,10781482        |                  |
| c14               | Postn          | 1,01430914  | 8,64E-08          |                  |
| c14               | Cyp1b1         | 1,050306435 | 0,01728225        |                  |
| c14               | Gfpt2          | 1,118111488 | 0,30165168        |                  |
| c14               | Mxra7          | 1,028276892 | 1                 |                  |
| <b>Adipocytes</b> | <b>cluster</b> | <b>gene</b> | <b>avg_log2FC</b> | <b>p_val_adj</b> |
|                   | c18            | Hp          | 3,733926066       | 0                |
|                   | c18            | Plin4       | 4,669642665       | 0                |
|                   | c18            | Cidec       | 3,93824277        | 0                |
|                   | c18            | Dgat2       | 4,270806953       | 0                |
|                   | c18            | Slc1a5      | 3,807360091       | 0                |
|                   | c18            | Lipe        | 3,978291829       | 0                |
|                   | c18            | Npr3        | 4,005632667       | 0                |
|                   | c18            | Plin1       | 4,231160307       | 0                |
|                   | c18            | Itga7       | 4,558840386       | 0                |
|                   | c18            | G0s2        | 4,309407458       | 1,32E-296        |
|                   | c18            | Fabp4       | 2,032275751       | 3,54E-278        |

|     |         |             |           |
|-----|---------|-------------|-----------|
| c18 | Cav1    | 2,992215797 | 4,52E-274 |
| c18 | Adipoq  | 4,316246966 | 6,02E-269 |
| c18 | Slc7a10 | 5,789757004 | 1,33E-260 |
| c18 | Car3    | 3,793746253 | 1,01E-244 |
| c18 | Pck1    | 4,860822138 | 1,20E-225 |
| c18 | Lrg1    | 3,432922033 | 1,04E-218 |
| c18 | Ghr     | 3,506238759 | 1,92E-218 |
| c18 | Mmd     | 3,181181158 | 1,20E-214 |
| c18 | Gpd1    | 3,801770767 | 4,11E-196 |

| <b>Vascular cells</b> | <b>cluster</b> | <b>gene</b> | <b>avg_log2FC</b> | <b>p_val_adj</b> |
|-----------------------|----------------|-------------|-------------------|------------------|
|                       | c15            | Hba-a2      | 5,618469115       | 0                |
|                       | c15            | Hbb-bs      | 5,520367825       | 0                |
|                       | c15            | Flywch2     | 4,69895539        | 5,02E-06         |
|                       | c15            | Trp53inp2   | 1,841828993       | 0,00365954       |
|                       | c15            | Iqcb1       | 3,890250159       | 0,05863564       |
|                       | c15            | Plekha5     | 3,345766462       | 0,06303363       |
|                       | c15            | Abcc9       | 2,60888935        | 0,09494467       |
|                       | c15            | Gucy1b1     | 2,674935145       | 0,10506234       |
|                       | c15            | Ushbp1      | 2,702685372       | 0,1370174        |
|                       | c15            | Lgi4        | 4,136526665       | 0,40931127       |
|                       | c15            | Hbb-bt      | 2,654855024       | 0,43100568       |
|                       | c15            | Lamb2       | 2,321653123       | 0,95976532       |
|                       | c15            | Mms19       | 2,438635496       | 1                |
|                       | c15            | Ntrk2       | 2,300963979       | 1                |
|                       | c15            | Pald1       | 2,968020765       | 1                |
|                       | c15            | Fbxo11      | 2,664348449       | 1                |
|                       | c15            | Gtf2a2      | 2,001344899       | 1                |
|                       | c15            | Chaf1b      | 2,584946376       | 1                |
|                       | c15            | Dnajc9      | 2,169426774       | 1                |
|                       | c15            | Myo1d       | 2,786182712       | 1                |
|                       | c16            | Hbb-bs      | 8,159622355       | 0                |
|                       | c16            | Hba-a2      | 7,95511284        | 0                |
|                       | c16            | Alas2       | 8,275682406       | 8,95E-143        |
|                       | c16            | Hbb-bt      | 6,934440392       | 1,72E-111        |
|                       | c16            | Or5aq7      | 13,94074473       | 3,52E-50         |
|                       | c16            | Or12e14     | 14,18916823       | 3,52E-50         |
|                       | c16            | Pabpc4l     | 14,03490115       | 3,52E-50         |
|                       | c16            | Slc1a7      | 13,94074473       | 3,52E-50         |
|                       | c16            | Muc3a       | 14,14634514       | 3,52E-50         |
|                       | c16            | Pgpep1l     | 14,25595227       | 3,52E-50         |
|                       | c16            | Or51ah3     | 13,29636094       | 3,52E-50         |
|                       | c16            | Or5p60      | 14,41252809       | 3,52E-50         |
|                       | c16            | Ido1        | 12,01447401       | 3,52E-50         |
|                       | c16            | Fstl4       | 12,01447401       | 3,52E-50         |
|                       | c16            | Rnase9      | 15,02448351       | 3,52E-50         |
|                       | c16            | Rspo2       | 13,85252735       | 3,52E-50         |
|                       | c16            | Or9i14      | 14,12541332       | 3,52E-50         |
|                       | c16            | Dmrtc1b     | 14,03490115       | 3,52E-50         |

|     |        |             |           |
|-----|--------|-------------|-----------|
| c16 | Prg2   | 9,720701796 | 1,35E-23  |
| c16 | Skint6 | 9,343838972 | 1,35E-23  |
| c17 | Aqp1   | 4,939672035 | 0         |
| c17 | Tagln  | 5,996483079 | 0         |
| c17 | Rgs5   | 5,165705378 | 0         |
| c17 | Cldn5  | 5,089774218 | 8,46E-238 |
| c17 | Igfbp5 | 4,363749699 | 3,62E-201 |
| c17 | Ptprb  | 4,457475353 | 1,38E-128 |
| c17 | Card10 | 3,989347268 | 3,65E-113 |
| c17 | Cdk20  | 3,943281902 | 1,80E-92  |
| c17 | Myh11  | 3,958189985 | 3,31E-40  |
| c17 | Igf2   | 5,507776545 | 2,76E-30  |
| c17 | Pecam1 | 2,55409329  | 2,86E-29  |
| c17 | Acta2  | 3,100454496 | 1,11E-26  |
| c17 | Igfbp7 | 1,308070489 | 2,16E-26  |
| c17 | Gja5   | 5,499831252 | 3,90E-26  |
| c17 | Sox17  | 2,924094815 | 8,88E-26  |
| c17 | Tm4sf1 | 2,960517973 | 1,11E-23  |
| c17 | Sema3g | 3,7288737   | 6,94E-23  |
| c17 | Tspan7 | 3,00258966  | 1,74E-21  |
| c17 | Clu    | 2,270501308 | 4,09E-21  |
| c17 | Bcam   | 4,020884871 | 2,93E-20  |

| <b>Proliferation</b> | <b>cluster</b> | <b>gene</b> | <b>avg_log2FC</b> | <b>p_val_adj</b> |
|----------------------|----------------|-------------|-------------------|------------------|
|                      | c9             | Tk1         | 8,420969458       | 0                |
|                      | c9             | E2f2        | 5,261109669       | 3,78E-27         |
|                      | c9             | Kif22       | 3,825539433       | 1,06E-10         |
|                      | c9             | Esco2       | 4,186609725       | 3,59E-09         |
|                      | c9             | Aunip       | 4,638436881       | 2,68E-08         |
|                      | c9             | Psd         | 3,860552172       | 2,78E-08         |
|                      | c9             | Carf        | 4,925381574       | 4,02E-08         |
|                      | c9             | Naaladl1    | 5,000988341       | 4,02E-08         |
|                      | c9             | Cep57l1     | 3,35510946        | 2,28E-07         |
|                      | c9             | H2ac24      | 2,353144426       | 8,99E-07         |
|                      | c9             | Gipc2       | 4,811865418       | 1,20E-06         |
|                      | c9             | Insl6       | 4,44405715        | 1,20E-06         |
|                      | c9             | Cchcr1      | 3,47985741        | 1,43E-06         |
|                      | c9             | Kn1         | 4,272394522       | 3,18E-06         |
|                      | c9             | Kif11       | 2,371819502       | 4,00E-06         |
|                      | c9             | Dbf4        | 2,751622922       | 4,12E-06         |
|                      | c9             | Mis18bp1    | 3,197824035       | 4,53E-06         |
|                      | c9             | Mcm3        | 2,194752878       | 9,56E-05         |
|                      | c9             | Cenpm       | 3,605245851       | 9,60E-05         |
|                      | c9             | Clec4b1     | 2,375639349       | 0,00012302       |
|                      | c10            | Rrm2        | 7,194781359       | 0                |
|                      | c10            | Mki67       | 5,993146222       | 0                |
|                      | c10            | Slbp        | 5,201799668       | 0                |
|                      | c10            | Top2a       | 5,711720311       | 0                |
|                      | c10            | Trappc11    | 4,148235806       | 1,23E-98         |

|     |        |             |            |
|-----|--------|-------------|------------|
| c10 | Aurkb  | 2,685597228 | 1,95E-10   |
| c10 | Uhrf1  | 2,126788266 | 3,82E-09   |
| c10 | Tpx2   | 2,966656369 | 3,98E-09   |
| c10 | H2ac8  | 2,041570315 | 8,33E-07   |
| c10 | Prc1   | 2,232183716 | 4,64E-06   |
| c10 | Zgrf1  | 2,523509334 | 5,96E-06   |
| c10 | H1f1   | 1,778456793 | 2,42E-05   |
| c10 | Mxd3   | 3,124993943 | 4,51E-05   |
| c10 | Stmn1  | 1,142585273 | 6,43E-05   |
| c10 | H1f4   | 1,335311321 | 0,00013841 |
| c10 | Pkmyt1 | 2,496154438 | 0,00037393 |
| c10 | E2f8   | 2,064017314 | 0,00056779 |
| c10 | Ccnf   | 2,501168605 | 0,00092006 |
| c10 | Mybl2  | 2,479881587 | 0,00092622 |
| c10 | Cenpf  | 2,795474367 | 0,00145768 |
